# Supplementary material
Source: publisher figshare collection journal article supplement (https://gsapubs.figshare.com/articles/dataset/_/24512923)
Supplement: Supplementary file 1 [file 1]

## Sheet: Supplemental Table 1
Normal effective stress (MPa)	Shear displacement (mm)	Deformation bands (μm)
2	20.944	162.71
2	20.944	189.83
2	20.944	189.86
2	20.944	189.95
2	20.944	193.22
2	20.944	195.46
2	20.944	200.11
2	20.944	205.8
2	20.944	207.43
2	20.944	215.31
2	20.944	216.95
2	20.944	218.35
2	20.944	218.61
2	20.944	220.63
2	20.944	221.63
2	20.944	222.9
2	20.944	225.74
2	20.944	227.07
2	20.944	228.91
2	20.944	230.38
2	20.944	231.13
2	20.944	231.41
2	20.944	233.99
2	20.944	236.62
2	20.944	241.3
2	20.944	244.33
2	20.944	244.66
2	20.944	247.48
2	20.944	248.04
2	20.944	251.05
2	20.944	253.33
2	20.944	261.11
2	20.944	262.56
2	20.944	264.28
2	20.944	264.43
2	20.944	264.6
2	20.944	267.8
2	20.944	267.82
2	20.944	267.99
2	20.944	271.19
2	20.944	271.27
2	20.944	271.87
2	20.944	274.38
2	20.944	278.45
2	20.944	284.06
2	20.944	284.75
2	20.944	284.77
2	20.944	286.56
2	20.944	287.86
2	20.944	291.53
2	20.944	291.98
2	20.944	297.46
2	20.944	298.48
2	20.944	302.64
2	20.944	305.09
2	20.944	306.88
2	20.944	308.48
2	20.944	311.94
2	20.944	335.61
2	25.5254	138.84
2	25.5254	152.74
2	25.5254	159.45
2	25.5254	162.34
2	25.5254	164.07
2	25.5254	170
2	25.5254	182.55
2	25.5254	187.12
2	25.5254	189.72
2	25.5254	196.49
2	25.5254	198.01
2	25.5254	201.26
2	25.5254	215.25
2	25.5254	217.84
2	25.5254	221.76
2	25.5254	226.01
2	25.5254	229.11
2	25.5254	229.58
2	25.5254	235.34
2	25.5254	265.02
2	25.5254	281.39
2	25.5254	321.69
2	30.1069	144.08
2	30.1069	163.84
2	30.1069	168.01
2	30.1069	168.52
2	30.1069	171.15
2	30.1069	171.37
2	30.1069	174.73
2	30.1069	177.83
2	30.1069	180.41
2	30.1069	184.44
2	30.1069	186.69
2	30.1069	186.72
2	30.1069	187.05
2	30.1069	190.11
2	30.1069	190.11
2	30.1069	193.08
2	30.1069	195.38
2	30.1069	196.87
2	30.1069	197.49
2	30.1069	197.71
2	30.1069	198.63
2	30.1069	209.12
2	30.1069	216.51
2	30.1069	222.16
2	30.1069	234.61
2	30.1069	236.86
2	30.1069	237.1
2	30.1069	242.03
2	30.1069	242.91
2	30.1069	251.1
2	30.1069	262.02
2	30.1069	268.39
2	30.1069	278.1
2	30.1069	363.93
2	34.6884	191.45
2	34.6884	204
2	34.6884	223.09
2	34.6884	243.31
2	34.6884	245.48
2	34.6884	278.81
2	34.6884	279.44
2	34.6884	282.51
2	34.6884	285.48
2	34.6884	298.41
2	34.6884	299.73
2	34.6884	301.14
2	34.6884	303.88
2	34.6884	313.49
2	34.6884	323.2
2	34.6884	325.66
2	34.6884	336.95
2	34.6884	341.18
2	34.6884	342.74
2	34.6884	344.19
2	34.6884	345.56
2	34.6884	355.16
2	34.6884	385.77
2	34.6884	395.79
2	39.2699	112.31
2	39.2699	132.07
2	39.2699	132.07
2	39.2699	136.47
2	39.2699	139.65
2	39.2699	140.19
2	39.2699	147.22
2	39.2699	150.2
2	39.2699	151.13
2	39.2699	166.8
2	39.2699	166.98
2	39.2699	181.97
2	39.2699	185
2	39.2699	185.06
2	39.2699	188.09
2	39.2699	189.61
2	39.2699	203.25
2	39.2699	203.49
2	39.2699	206.33
2	39.2699	207.75
2	39.2699	209.34
2	39.2699	214.11
2	39.2699	221.12
2	39.2699	229.02
2	39.2699	253.73
2	39.2699	258.81
2	39.2699	291.28
2	39.2699	324.85
2	39.2699	343.38
2	39.2699	384.49
2	41.8879	152.69
2	41.8879	160.02
2	41.8879	161.64
2	41.8879	171.55
2	41.8879	172.51
2	41.8879	174.99
2	41.8879	175.58
2	41.8879	176.29
2	41.8879	176.46
2	41.8879	189.83
2	41.8879	195.68
2	41.8879	196.74
2	41.8879	202.74
2	41.8879	206.04
2	41.8879	210.17
2	41.8879	212.82
2	41.8879	214.54
2	41.8879	221.69
2	41.8879	224.74
2	41.8879	229.65
2	41.8879	232.39
2	41.8879	237.96
2	41.8879	244
2	41.8879	246.6
2	41.8879	252.53
2	41.8879	252.53
2	41.8879	253.29
2	41.8879	254.08
2	41.8879	256.58
2	41.8879	256.64
2	41.8879	258.35
2	41.8879	261.41
2	41.8879	262.63
2	41.8879	264.04
2	41.8879	264.75
2	41.8879	267.62
2	41.8879	269.37
2	41.8879	270.29
2	41.8879	271.26
2	41.8879	276.91
2	41.8879	295.48
2	41.8879	303.14
2	41.8879	310.46
2	41.8879	311.78
2	41.8879	316.29
2	41.8879	317.37
2	41.8879	319.79
2	41.8879	320.69
2	41.8879	323.11
2	41.8879	330.19
2	41.8879	332.25
2	41.8879	337.23
2	41.8879	339.45
2	41.8879	345.54
2	41.8879	362.22
2	51.0509	213.35
2	51.0509	218.68
2	51.0509	219.88
2	51.0509	235.36
2	51.0509	236.78
2	51.0509	238.52
2	51.0509	240.92
2	51.0509	249.25
2	51.0509	253.28
2	51.0509	255.06
2	51.0509	259.44
2	51.0509	260.2
2	51.0509	262.63
2	51.0509	265.46
2	51.0509	266.06
2	51.0509	266.06
2	51.0509	272.74
2	51.0509	272.77
2	51.0509	275.51
2	51.0509	279.21
2	51.0509	284.27
2	51.0509	290.26
2	51.0509	292.21
2	51.0509	298.82
2	51.0509	300.15
2	51.0509	303
2	51.0509	303.11
2	51.0509	305.21
2	51.0509	305.92
2	51.0509	310.32
2	51.0509	317.74
2	51.0509	342.54
2	51.0509	350.69
2	51.0509	351.78
2	51.0509	375.48
2	51.0509	391.75
2	51.0509	393.95
2	51.0509	395.41
2	51.0509	398.28
2	60.2139	138.76
2	60.2139	158.1
2	60.2139	158.22
2	60.2139	161.25
2	60.2139	161.33
2	60.2139	162.24
2	60.2139	163.35
2	60.2139	163.55
2	60.2139	170.62
2	60.2139	172.16
2	60.2139	172.92
2	60.2139	173.75
2	60.2139	174.22
2	60.2139	175.59
2	60.2139	179.57
2	60.2139	179.91
2	60.2139	180.31
2	60.2139	187.89
2	60.2139	189.86
2	60.2139	190.15
2	60.2139	192.44
2	60.2139	192.48
2	60.2139	193.27
2	60.2139	202.05
2	60.2139	203.56
2	60.2139	207.08
2	60.2139	213.48
2	60.2139	217.31
2	60.2139	218.28
2	60.2139	219.41
2	60.2139	227.88
2	60.2139	230.03
2	60.2139	230.31
2	60.2139	242.06
2	60.2139	246.24
2	60.2139	259.15
2	60.2139	265.26
2	60.2139	268.48
2	60.2139	310.5
2	60.2139	337.97
2	60.2139	397.89
2	62.8319	147.18
2	62.8319	149.93
2	62.8319	152.94
2	62.8319	153.65
2	62.8319	158.93
2	62.8319	161.79
2	62.8319	166.12
2	62.8319	170.59
2	62.8319	170.99
2	62.8319	176.5
2	62.8319	179.44
2	62.8319	179.88
2	62.8319	185.39
2	62.8319	185.39
2	62.8319	186.57
2	62.8319	188.6
2	62.8319	188.6
2	62.8319	194.21
2	62.8319	194.32
2	62.8319	197.06
2	62.8319	200.02
2	62.8319	200.35
2	62.8319	204.57
2	62.8319	204.65
2	62.8319	208.39
2	62.8319	208.39
2	62.8319	208.91
2	62.8319	211.85
2	62.8319	211.88
2	62.8319	212.97
2	62.8319	214.79
2	62.8319	214.89
2	62.8319	215.71
2	62.8319	216.99
2	62.8319	216.99
2	62.8319	220.43
2	62.8319	222.83
2	62.8319	223.7
2	62.8319	224.47
2	62.8319	224.81
2	62.8319	225.75
2	62.8319	225.76
2	62.8319	229.43
2	62.8319	229.71
2	62.8319	230.02
2	62.8319	231.5
2	62.8319	232.4
2	62.8319	235.9
2	62.8319	237.09
2	62.8319	238.95
2	62.8319	239.56
2	62.8319	239.96
2	62.8319	241.19
2	62.8319	241.34
2	62.8319	241.34
2	62.8319	241.46
2	62.8319	241.66
2	62.8319	242.28
2	62.8319	242.48
2	62.8319	242.75
2	62.8319	243.74
2	62.8319	244.12
2	62.8319	244.44
2	62.8319	245.08
2	62.8319	245.3
2	62.8319	245.31
2	62.8319	246.98
2	62.8319	247.06
2	62.8319	247.87
2	62.8319	249.35
2	62.8319	249.49
2	62.8319	249.64
2	62.8319	249.89
2	62.8319	250.07
2	62.8319	250.3
2	62.8319	252.75
2	62.8319	254.16
2	62.8319	254.39
2	62.8319	256.15
2	62.8319	256.29
2	62.8319	256.78
2	62.8319	256.99
2	62.8319	258.26
2	62.8319	258.64
2	62.8319	259.57
2	62.8319	259.67
2	62.8319	259.83
2	62.8319	259.91
2	62.8319	261.97
2	62.8319	262.26
2	62.8319	262.77
2	62.8319	263.17
2	62.8319	264.1
2	62.8319	264.34
2	62.8319	264.96
2	62.8319	265.23
2	62.8319	265.89
2	62.8319	266.91
2	62.8319	267.13
2	62.8319	267.13
2	62.8319	267.8
2	62.8319	269.61
2	62.8319	269.91
2	62.8319	269.94
2	62.8319	271.22
2	62.8319	272.37
2	62.8319	272.38
2	62.8319	273.53
2	62.8319	274.05
2	62.8319	276.16
2	62.8319	276.3
2	62.8319	276.57
2	62.8319	279.78
2	62.8319	281.03
2	62.8319	281.83
2	62.8319	282.38
2	62.8319	282.86
2	62.8319	283.71
2	62.8319	283.83
2	62.8319	286.35
2	62.8319	286.41
2	62.8319	287.17
2	62.8319	287.64
2	62.8319	287.86
2	62.8319	288.63
2	62.8319	288.63
2	62.8319	288.75
2	62.8319	288.94
2	62.8319	289.65
2	62.8319	290.02
2	62.8319	290.77
2	62.8319	291.53
2	62.8319	291.93
2	62.8319	292.02
2	62.8319	292.27
2	62.8319	293.81
2	62.8319	294.06
2	62.8319	294.57
2	62.8319	295.45
2	62.8319	295.73
2	62.8319	297.15
2	62.8319	298.24
2	62.8319	298.28
2	62.8319	299.41
2	62.8319	299.76
2	62.8319	299.89
2	62.8319	299.95
2	62.8319	300.92
2	62.8319	301.61
2	62.8319	302.99
2	62.8319	303.57
2	62.8319	304.04
2	62.8319	304.25
2	62.8319	304.5
2	62.8319	305.47
2	62.8319	305.63
2	62.8319	306.41
2	62.8319	306.53
2	62.8319	306.67
2	62.8319	306.71
2	62.8319	307.35
2	62.8319	309.46
2	62.8319	309.46
2	62.8319	310.17
2	62.8319	310.78
2	62.8319	311.15
2	62.8319	311.37
2	62.8319	312.31
2	62.8319	313.06
2	62.8319	314.17
2	62.8319	314.55
2	62.8319	315.37
2	62.8319	316
2	62.8319	316.91
2	62.8319	317.34
2	62.8319	318.95
2	62.8319	320.65
2	62.8319	321.21
2	62.8319	321.87
2	62.8319	322.17
2	62.8319	322.18
2	62.8319	322.34
2	62.8319	325.24
2	62.8319	325.77
2	62.8319	326.62
2	62.8319	327.06
2	62.8319	327.96
2	62.8319	328.81
2	62.8319	329.98
2	62.8319	330.52
2	62.8319	331.4
2	62.8319	331.42
2	62.8319	331.46
2	62.8319	332.06
2	62.8319	334.9
2	62.8319	335.36
2	62.8319	336.06
2	62.8319	336.67
2	62.8319	336.99
2	62.8319	337.03
2	62.8319	337.23
2	62.8319	338.38
2	62.8319	339.64
2	62.8319	343.53
2	62.8319	343.69
2	62.8319	344.47
2	62.8319	344.74
2	62.8319	347.19
2	62.8319	347.83
2	62.8319	348.02
2	62.8319	348.32
2	62.8319	348.99
2	62.8319	348.99
2	62.8319	349.82
2	62.8319	349.82
2	62.8319	351.72
2	62.8319	353.52
2	62.8319	356.16
2	62.8319	356.26
2	62.8319	357.18
2	62.8319	358.01
2	62.8319	358.74
2	62.8319	358.74
2	62.8319	358.85
2	62.8319	359.01
2	62.8319	359.45
2	62.8319	360.87
2	62.8319	361.72
2	62.8319	362.43
2	62.8319	363.54
2	62.8319	365.49
2	62.8319	366.5
2	62.8319	366.57
2	62.8319	368.49
2	62.8319	373.2
2	62.8319	373.23
2	62.8319	373.68
2	62.8319	373.86
2	62.8319	375.65
2	62.8319	375.93
2	62.8319	376.94
2	62.8319	378.7
2	62.8319	380.56
2	62.8319	380.67
2	62.8319	380.99
2	62.8319	385.01
2	62.8319	385.22
2	62.8319	386.63
2	62.8319	387.1
2	62.8319	388.44
2	62.8319	389.81
2	62.8319	390.38
2	62.8319	391.87
2	62.8319	391.9
2	62.8319	392.92
2	62.8319	394.36
2	62.8319	403.15
2	62.8319	405.73
2	62.8319	407.69
2	62.8319	414.23
2	62.8319	420.98
2	69.3768	134.77
2	69.3768	141.87
2	69.3768	148.86
2	69.3768	162.24
2	69.3768	165.99
2	69.3768	172.56
2	69.3768	188.67
2	69.3768	193.16
2	69.3768	195.76
2	69.3768	199.48
2	69.3768	201.59
2	69.3768	206.43
2	69.3768	209.16
2	69.3768	211.91
2	69.3768	217.29
2	69.3768	219.82
2	69.3768	220.49
2	69.3768	225.83
2	69.3768	232.13
2	69.3768	234.71
2	69.3768	238.83
2	69.3768	239.93
2	69.3768	239.93
2	69.3768	240.94
2	69.3768	253.35
2	69.3768	255.48
2	69.3768	263.95
2	69.3768	268.29
2	69.3768	269.55
2	69.3768	271.57
2	69.3768	272.2
2	69.3768	272.73
2	69.3768	273.32
2	69.3768	280.45
2	69.3768	307.57
2	69.3768	328.77
2	69.3768	328.78
2	69.3768	337.08
2	69.3768	337.28
2	69.3768	363
2	69.3768	371.42
2	69.3768	373.28
2	69.3768	374.25
2	69.3768	379.91
2	69.3768	382.31
2	69.3768	393.15
2	69.3768	415.69
2	69.3768	426.56
2	69.3768	427.41
2	76.5763	128.44
2	76.5763	132.91
2	76.5763	139.53
2	76.5763	148.62
2	76.5763	148.62
2	76.5763	152.38
2	76.5763	157.19
2	76.5763	159.24
2	76.5763	163.91
2	76.5763	168.81
2	76.5763	171.53
2	76.5763	172.51
2	76.5763	176.36
2	76.5763	176.74
2	76.5763	176.98
2	76.5763	179.22
2	76.5763	179.22
2	76.5763	181.27
2	76.5763	183.19
2	76.5763	184.22
2	76.5763	185.18
2	76.5763	186.94
2	76.5763	188.01
2	76.5763	188.68
2	76.5763	189.8
2	76.5763	190.74
2	76.5763	191.12
2	76.5763	191.77
2	76.5763	191.93
2	76.5763	192.83
2	76.5763	193.63
2	76.5763	194.56
2	76.5763	195.34
2	76.5763	198.14
2	76.5763	199.84
2	76.5763	199.92
2	76.5763	201.26
2	76.5763	202.24
2	76.5763	203.21
2	76.5763	204.64
2	76.5763	205.6
2	76.5763	206.13
2	76.5763	206.27
2	76.5763	206.54
2	76.5763	207.32
2	76.5763	207.74
2	76.5763	207.93
2	76.5763	209.34
2	76.5763	210.14
2	76.5763	212.42
2	76.5763	213.12
2	76.5763	213.85
2	76.5763	214.69
2	76.5763	215.76
2	76.5763	215.88
2	76.5763	219.1
2	76.5763	219.29
2	76.5763	219.82
2	76.5763	220.02
2	76.5763	220.22
2	76.5763	220.95
2	76.5763	221.27
2	76.5763	221.46
2	76.5763	221.92
2	76.5763	222.38
2	76.5763	222.93
2	76.5763	222.99
2	76.5763	223.8
2	76.5763	226.2
2	76.5763	226.58
2	76.5763	227.38
2	76.5763	228.96
2	76.5763	229.45
2	76.5763	230.75
2	76.5763	231.02
2	76.5763	232.35
2	76.5763	232.35
2	76.5763	232.64
2	76.5763	233.28
2	76.5763	233.8
2	76.5763	234.44
2	76.5763	235.11
2	76.5763	235.26
2	76.5763	235.26
2	76.5763	236.64
2	76.5763	237.45
2	76.5763	237.9
2	76.5763	238.07
2	76.5763	238.08
2	76.5763	238.14
2	76.5763	239
2	76.5763	239.35
2	76.5763	240.9
2	76.5763	240.92
2	76.5763	240.97
2	76.5763	242.12
2	76.5763	243.08
2	76.5763	243.86
2	76.5763	245.6
2	76.5763	245.79
2	76.5763	246.98
2	76.5763	248.31
2	76.5763	249.38
2	76.5763	249.88
2	76.5763	251.19
2	76.5763	252.06
2	76.5763	252.51
2	76.5763	252.66
2	76.5763	252.73
2	76.5763	254.38
2	76.5763	254.89
2	76.5763	254.96
2	76.5763	255.86
2	76.5763	256.06
2	76.5763	256.18
2	76.5763	257.16
2	76.5763	257.3
2	76.5763	258.2
2	76.5763	258.58
2	76.5763	260.15
2	76.5763	261.28
2	76.5763	261.28
2	76.5763	261.47
2	76.5763	262.72
2	76.5763	262.77
2	76.5763	263.6
2	76.5763	264.05
2	76.5763	264.07
2	76.5763	264.13
2	76.5763	264.31
2	76.5763	264.37
2	76.5763	266.42
2	76.5763	266.66
2	76.5763	267.27
2	76.5763	268.68
2	76.5763	268.78
2	76.5763	268.97
2	76.5763	269.2
2	76.5763	269.94
2	76.5763	270.47
2	76.5763	271.37
2	76.5763	271.68
2	76.5763	272.84
2	76.5763	272.96
2	76.5763	273.43
2	76.5763	274.73
2	76.5763	275.93
2	76.5763	276.47
2	76.5763	279.39
2	76.5763	279.64
2	76.5763	279.91
2	76.5763	280.53
2	76.5763	281.13
2	76.5763	283.14
2	76.5763	283.68
2	76.5763	284.04
2	76.5763	284.58
2	76.5763	284.8
2	76.5763	286.25
2	76.5763	289.89
2	76.5763	291.15
2	76.5763	294.34
2	76.5763	295.94
2	76.5763	296.08
2	76.5763	296.79
2	76.5763	297.26
2	76.5763	297.94
2	76.5763	299.81
2	76.5763	299.88
2	76.5763	299.92
2	76.5763	300.16
2	76.5763	300.19
2	76.5763	304.22
2	76.5763	306.7
2	76.5763	308.16
2	76.5763	310.32
2	76.5763	310.39
2	76.5763	310.75
2	76.5763	311.63
2	76.5763	311.91
2	76.5763	313.54
2	76.5763	315.31
2	76.5763	315.93
2	76.5763	316.13
2	76.5763	318.48
2	76.5763	320.59
2	76.5763	320.76
2	76.5763	328.65
2	76.5763	330
2	76.5763	331.12
2	76.5763	331.37
2	76.5763	334.11
2	76.5763	336.54
2	76.5763	338.11
2	76.5763	342.54
2	76.5763	349.28
2	76.5763	349.51
2	76.5763	356.49
2	76.5763	357.95
2	76.5763	361.22
2	76.5763	361.73
2	76.5763	363.11
2	76.5763	363.53
2	76.5763	373.27
2	76.5763	377.44
2	76.5763	379.1
2	76.5763	382.94
2	76.5763	387.56
2	76.5763	387.9
2	76.5763	389.55
2	76.5763	393.99
2	76.5763	401.25
2	76.5763	402.41
2	76.5763	405.03
2	76.5763	413.32
2	78.5398	132.85
2	78.5398	143.86
2	78.5398	155.26
2	78.5398	164.95
2	78.5398	179.08
2	78.5398	184.22
2	78.5398	187.04
2	78.5398	189.6
2	78.5398	196.72
2	78.5398	203.63
2	78.5398	208.09
2	78.5398	208.92
2	78.5398	210.53
2	78.5398	212.78
2	78.5398	213.76
2	78.5398	214.06
2	78.5398	214.29
2	78.5398	215.07
2	78.5398	216.23
2	78.5398	221.01
2	78.5398	225
2	78.5398	228.1
2	78.5398	230.05
2	78.5398	234.08
2	78.5398	235.12
2	78.5398	238.83
2	78.5398	239.59
2	78.5398	242.34
2	78.5398	249.59
2	78.5398	252.46
2	78.5398	253.83
2	78.5398	256.26
2	78.5398	256.91
2	78.5398	257.01
2	78.5398	257.19
2	78.5398	258.31
2	78.5398	260.03
2	78.5398	261.17
2	78.5398	264.94
2	78.5398	266.8
2	78.5398	267.38
2	78.5398	267.44
2	78.5398	270.75
2	78.5398	273.45
2	78.5398	277.75
2	78.5398	278.71
2	78.5398	285.47
2	78.5398	286.21
2	78.5398	293.34
2	78.5398	327.67
2	78.5398	336.4
2	78.5398	336.59
2	78.5398	338.64
2	78.5398	350.84
2	78.5398	364.99
2	78.5398	374.78
2	78.5398	425.02
2	78.5398	434.92
2	78.5398	445.06
2	78.5398	454.92
2	83.7758	218.76
2	83.7758	241.01
2	83.7758	242.82
2	83.7758	246.21
2	83.7758	278.03
2	83.7758	280.52
2	83.7758	280.6
2	83.7758	281.09
2	83.7758	284.19
2	83.7758	286.49
2	83.7758	286.87
2	83.7758	288.14
2	83.7758	290.7
2	83.7758	295.68
2	83.7758	296.71
2	83.7758	301.27
2	83.7758	303.3
2	83.7758	303.65
2	83.7758	311
2	83.7758	317.14
2	83.7758	321.17
2	83.7758	326.75
2	83.7758	338.28
2	83.7758	349.62
2	83.7758	352.84
2	83.7758	360.08
2	83.7758	361.44
2	83.7758	395.34
2	83.7758	412.81
2	83.7758	426.21
2	83.7758	436.41
2	90.3208	147.32
2	90.3208	147.37
2	90.3208	147.52
2	90.3208	151.17
2	90.3208	154.6
2	90.3208	155.35
2	90.3208	156.97
2	90.3208	157.34
2	90.3208	160.52
2	90.3208	162.01
2	90.3208	164.42
2	90.3208	165.13
2	90.3208	169.79
2	90.3208	170.82
2	90.3208	173.75
2	90.3208	177.64
2	90.3208	181.45
2	90.3208	181.92
2	90.3208	183.21
2	90.3208	186.27
2	90.3208	187.63
2	90.3208	188.2
2	90.3208	189.83
2	90.3208	190.83
2	90.3208	191.19
2	90.3208	191.54
2	90.3208	192.73
2	90.3208	194.78
2	90.3208	194.79
2	90.3208	197.61
2	90.3208	198.26
2	90.3208	198.38
2	90.3208	200.93
2	90.3208	201.23
2	90.3208	201.92
2	90.3208	201.92
2	90.3208	202.86
2	90.3208	203.5
2	90.3208	203.91
2	90.3208	206.58
2	90.3208	209.12
2	90.3208	210.27
2	90.3208	211.1
2	90.3208	213.28
2	90.3208	214
2	90.3208	216.72
2	90.3208	216.97
2	90.3208	217.79
2	90.3208	218.25
2	90.3208	220.96
2	90.3208	222.36
2	90.3208	223.03
2	90.3208	223.91
2	90.3208	224.91
2	90.3208	226.77
2	90.3208	227.08
2	90.3208	227.29
2	90.3208	227.69
2	90.3208	227.97
2	90.3208	230.19
2	90.3208	230.5
2	90.3208	230.67
2	90.3208	231.65
2	90.3208	231.69
2	90.3208	232.19
2	90.3208	232.21
2	90.3208	232.21
2	90.3208	232.32
2	90.3208	234.21
2	90.3208	234.98
2	90.3208	235.07
2	90.3208	236.54
2	90.3208	236.87
2	90.3208	237.13
2	90.3208	237.73
2	90.3208	238.32
2	90.3208	238.82
2	90.3208	239.12
2	90.3208	239.46
2	90.3208	240.63
2	90.3208	240.84
2	90.3208	241.29
2	90.3208	242.03
2	90.3208	242.03
2	90.3208	242.75
2	90.3208	243.27
2	90.3208	243.72
2	90.3208	244.85
2	90.3208	245.31
2	90.3208	246
2	90.3208	246.89
2	90.3208	247.81
2	90.3208	247.97
2	90.3208	248.48
2	90.3208	248.56
2	90.3208	250.35
2	90.3208	251.4
2	90.3208	251.73
2	90.3208	253.29
2	90.3208	253.34
2	90.3208	253.42
2	90.3208	254.42
2	90.3208	255.12
2	90.3208	255.48
2	90.3208	256.74
2	90.3208	258.17
2	90.3208	258.9
2	90.3208	259.18
2	90.3208	260.84
2	90.3208	260.88
2	90.3208	261.02
2	90.3208	261.22
2	90.3208	262.18
2	90.3208	262.94
2	90.3208	263.1
2	90.3208	263.76
2	90.3208	264.18
2	90.3208	264.19
2	90.3208	264.37
2	90.3208	265.69
2	90.3208	265.89
2	90.3208	266.46
2	90.3208	266.93
2	90.3208	267.05
2	90.3208	267.09
2	90.3208	267.59
2	90.3208	270.96
2	90.3208	271.09
2	90.3208	271.76
2	90.3208	272.96
2	90.3208	273.58
2	90.3208	273.91
2	90.3208	275.73
2	90.3208	275.73
2	90.3208	275.97
2	90.3208	276.28
2	90.3208	278.53
2	90.3208	278.63
2	90.3208	278.67
2	90.3208	279.17
2	90.3208	279.53
2	90.3208	279.53
2	90.3208	279.97
2	90.3208	281.59
2	90.3208	281.63
2	90.3208	282.97
2	90.3208	283.01
2	90.3208	283.33
2	90.3208	284.21
2	90.3208	284.57
2	90.3208	285.69
2	90.3208	287.71
2	90.3208	287.85
2	90.3208	288.26
2	90.3208	290.37
2	90.3208	290.38
2	90.3208	291.7
2	90.3208	291.8
2	90.3208	293.08
2	90.3208	294.52
2	90.3208	296.17
2	90.3208	297.67
2	90.3208	297.82
2	90.3208	297.85
2	90.3208	298.66
2	90.3208	299.17
2	90.3208	300.41
2	90.3208	302.35
2	90.3208	303.34
2	90.3208	304.75
2	90.3208	306.14
2	90.3208	308.89
2	90.3208	309.29
2	90.3208	309.36
2	90.3208	314.86
2	90.3208	315.53
2	90.3208	316.84
2	90.3208	317.52
2	90.3208	318.68
2	90.3208	320.3
2	90.3208	321.06
2	90.3208	324.18
2	90.3208	324.67
2	90.3208	324.67
2	90.3208	324.76
2	90.3208	325.79
2	90.3208	326.19
2	90.3208	326.74
2	90.3208	327.02
2	90.3208	327.57
2	90.3208	327.57
2	90.3208	327.71
2	90.3208	328.09
2	90.3208	329.27
2	90.3208	329.73
2	90.3208	330.45
2	90.3208	333
2	90.3208	335.86
2	90.3208	336.05
2	90.3208	336.11
2	90.3208	336.28
2	90.3208	337.57
2	90.3208	337.96
2	90.3208	338.03
2	90.3208	340.91
2	90.3208	342.52
2	90.3208	343.12
2	90.3208	343.3
2	90.3208	343.74
2	90.3208	343.87
2	90.3208	344.88
2	90.3208	347.52
2	90.3208	347.59
2	90.3208	349.05
2	90.3208	349.16
2	90.3208	350.8
2	90.3208	351.16
2	90.3208	351.21
2	90.3208	351.35
2	90.3208	351.9
2	90.3208	352.04
2	90.3208	352.21
2	90.3208	354.16
2	90.3208	354.89
2	90.3208	356.15
2	90.3208	358.15
2	90.3208	361.55
2	90.3208	364.88
2	90.3208	365.14
2	90.3208	365.19
2	90.3208	365.2
2	90.3208	365.21
2	90.3208	365.49
2	90.3208	366.38
2	90.3208	366.63
2	90.3208	367.39
2	90.3208	369.04
2	90.3208	369.12
2	90.3208	370.36
2	90.3208	370.53
2	90.3208	374.15
2	90.3208	374.31
2	90.3208	374.5
2	90.3208	376.85
2	90.3208	379.59
2	90.3208	385.14
2	90.3208	387.9
2	90.3208	389.93
2	90.3208	400.86
2	90.3208	404.32
2	90.3208	414.55
2	90.3208	414.93
2	90.3208	415.51
2	90.3208	420.45
2	90.3208	422.08
2	90.3208	422.08
2	90.3208	423.79
2	90.3208	429.67
2	90.3208	435.65
2	90.3208	439.64
2	90.3208	444.81
2	90.3208	447.59
2	90.3208	448.28
2	90.3208	449.59
2	90.3208	453.98
2	90.3208	455.68
2	90.3208	456.55
2	90.3208	458.45
2	90.3208	460.62
2	90.3208	473.75
2	102.102	143.58
2	102.102	148.23
2	102.102	151.42
2	102.102	179.1
2	102.102	191.81
2	102.102	194.8
2	102.102	199.45
2	102.102	217.04
2	102.102	223.88
2	102.102	250.12
2	102.102	253.32
2	102.102	259.96
2	102.102	262.91
2	102.102	275.66
2	102.102	291.98
2	102.102	292.81
2	102.102	313.96
2	102.102	314.95
2	102.102	318.06
2	102.102	325.13
2	102.102	328.89
2	102.102	335.3
2	102.102	336.82
2	102.102	337.26
2	102.102	338.27
2	102.102	338.64
2	102.102	339.72
2	102.102	340.44
2	102.102	341.65
2	102.102	345.74
2	102.102	345.74
2	102.102	345.86
2	102.102	348.35
2	102.102	349.49
2	102.102	350.44
2	102.102	351.96
2	102.102	362.43
2	102.102	362.87
2	102.102	364.29
2	102.102	368.49
2	102.102	370.59
2	102.102	371.52
2	102.102	373.05
2	102.102	373.43
2	102.102	377.61
	102.102	378.31
	102.102	379.42
	102.102	381.3
	102.102	382.18
	102.102	388.21
	102.102	400.36
	102.102	403.38
	102.102	407.4
	102.102	412.46
	102.102	415.87
	102.102	425.63
	102.102	427.49
	102.102	444.34
	102.102	444.5
	102.102	454.65
	104.065	134.4
	104.065	149.55
	104.065	160.93
	104.065	166.65
	104.065	168.54
	104.065	178.99
	104.065	180.74
	104.065	184.37
	104.065	188.83
	104.065	191.34
	104.065	191.96
	104.065	195.52
	104.065	199.68
	104.065	205.03
	104.065	205.45
	104.065	205.5
	104.065	205.76
	104.065	205.76
	104.065	206.71
	104.065	207.41
	104.065	208.6
	104.065	210.04
	104.065	210.26
	104.065	210.85
	104.065	211.58
	104.065	212.54
	104.065	215.86
	104.065	217.87
	104.065	218.08
	104.065	220.59
	104.065	220.59
	104.065	221.62
	104.065	224.43
	104.065	225.36
	104.065	226.87
	104.065	227.62
	104.065	228.24
	104.065	234.91
	104.065	236.83
	104.065	237.6
	104.065	238.87
	104.065	239.57
	104.065	240.21
	104.065	241.38
	104.065	242
	104.065	242.7
	104.065	243.96
	104.065	244.67
	104.065	246.69
	104.065	246.88
	104.065	248.21
	104.065	248.51
	104.065	249.79
	104.065	250.99
	104.065	255.88
	104.065	256.69
	104.065	257.89
	104.065	258.84
	104.065	260.03
	104.065	260.28
	104.065	260.36
	104.065	266.25
	104.065	267.98
	104.065	269.05
	104.065	271.09
	104.065	282.37
	104.065	289.83
	104.065	294.13
	104.065	297.07
	104.065	297.19
	104.065	300.01
	104.065	300.76
	104.065	304.04
	104.065	304.04
	104.065	305.88
	104.065	306.96
	104.065	307.14
	104.065	307.17
	104.065	307.91
	104.065	309.74
	104.065	310.7
	104.065	310.86
	104.065	311.11
	104.065	311.11
	104.065	311.82
	104.065	311.9
	104.065	312.52
	104.065	313.06
	104.065	314.88
	104.065	315.03
	104.065	315.62
	104.065	315.62
	104.065	317.21
	104.065	318.94
	104.065	319.17
	104.065	320.64
	104.065	320.71
	104.065	321.5
	104.065	322.14
	104.065	322.64
	104.065	323.55
	104.065	324.29
	104.065	324.81
	104.065	326.5
	104.065	327.18
	104.065	328.04
	104.065	329.46
	104.065	330.04
	104.065	330.49
	104.065	332.35
	104.065	332.53
	104.065	332.59
	104.065	332.81
	104.065	333.75
	104.065	334.31
	104.065	335.41
	104.065	337.04
	104.065	337.04
	104.065	338.72
	104.065	341.51
	104.065	342.65
	104.065	343.21
	104.065	343.6
	104.065	343.74
	104.065	347.26
	104.065	348.32
	104.065	348.85
	104.065	349.28
	104.065	350.51
	104.065	350.79
	104.065	351.07
	104.065	351.21
	104.065	351.46
	104.065	352.36
	104.065	353.9
	104.065	354.19
	104.065	354.33
	104.065	354.4
	104.065	354.84
	104.065	355.2
	104.065	355.8
	104.065	357.63
	104.065	360.5
	104.065	360.74
	104.065	361.03
	104.065	361.4
	104.065	361.43
	104.065	362.02
	104.065	362.26
	104.065	363.44
	104.065	365.5
	104.065	370.63
	104.065	371.54
	104.065	372.81
	104.065	373.58
	104.065	378.36
	104.065	379.93
	104.065	381.96
	104.065	382.4
	104.065	385.05
	104.065	388.79
	104.065	388.87
	104.065	389.93
	104.065	391.19
	104.065	391.27
	104.065	394.13
	104.065	396.29
	104.065	398.8
	104.065	399.39
	104.065	400.17
	104.065	402.78
	104.065	403.49
	104.065	407.9
	104.065	408.16
	104.065	408.57
	104.065	409.04
	104.065	417.91
	104.065	418.57
	104.065	420.6
	104.065	420.96
	104.065	420.96
	104.065	421.83
	104.065	425.21
	104.065	426.2
	104.065	426.31
	104.065	428.07
	104.065	429.41
	104.065	429.42
	104.065	429.5
	104.065	429.66
	104.065	431.8
	104.065	433.16
	104.065	434.52
	104.065	434.98
	104.065	435.19
	104.065	438.49
	104.065	438.82
	104.065	439.45
	104.065	441.27
	104.065	442.34
	104.065	444.13
	104.065	444.21
	104.065	445.19
	104.065	445.59
	104.065	447.74
	104.065	449.1
	104.065	450.04
	104.065	452.75
	104.065	452.87
	104.065	453.92
	104.065	454.82
	104.065	455.44
	104.065	455.93
	104.065	457.09
	104.065	459
	104.065	459.33
	104.065	459.86
	104.065	461.5
	104.065	461.8
	104.065	462.31
	104.065	467.14
	104.065	469.07
	104.065	470.28
	104.065	470.38
	104.065	470.71
	104.065	474.01
	104.065	478.14
	104.065	478.53
	104.065	484.24
	104.065	486.97
	104.065	487.86
	104.72	209.49
	104.72	233.68
	104.72	234.12
	104.72	234.66
	104.72	238.67
	104.72	243.42
	104.72	244.45
	104.72	247.27
	104.72	252.74
	104.72	255.09
	104.72	257.64
	104.72	263.29
	104.72	266.94
	104.72	270.05
	104.72	274.8
	104.72	278.74
	104.72	282.64
	104.72	285.67
	104.72	310.59
	104.72	317.22
	104.72	330.48
	104.72	331.74
	104.72	338.21
	104.72	340.64
	104.72	341.22
	104.72	343
	104.72	354.99
	104.72	370.13
	104.72	371.84
	104.72	373.13
	104.72	374.47
	104.72	376.58
	104.72	377.3
	104.72	377.82
	104.72	386.25
	104.72	387.39
	104.72	393.61
	104.72	398.4
	104.72	408.49
	104.72	410.16
	104.72	410.35
	104.72	415.83
	104.72	416.34
	104.72	417.23
	104.72	420.62
	104.72	421.24
	104.72	424.6
	104.72	427.65
	104.72	431.62
	117.81	204.75
	117.81	205.08
	117.81	205.86
	117.81	212.85
	117.81	213.12
	117.81	218.67
	117.81	221.26
	117.81	222.57
	117.81	222.81
	117.81	224.92
	117.81	227.24
	117.81	227.48
	117.81	230.17
	117.81	234.88
	117.81	236.15
	117.81	236.3
	117.81	236.6
	117.81	237.3
	117.81	239.84
	117.81	240.03
	117.81	240.03
	117.81	240.57
	117.81	243.13
	117.81	243.15
	117.81	245.74
	117.81	245.92
	117.81	246.42
	117.81	247.7
	117.81	248.25
	117.81	249.18
	117.81	249.77
	117.81	249.78
	117.81	251.08
	117.81	251.42
	117.81	251.9
	117.81	254.1
	117.81	254.93
	117.81	254.98
	117.81	255.75
	117.81	257.15
	117.81	257.39
	117.81	258.82
	117.81	258.94
	117.81	259.76
	117.81	260.22
	117.81	260.3
	117.81	260.3
	117.81	261.2
	117.81	262.11
	117.81	262.11
	117.81	262.27
	117.81	262.81
	117.81	263.09
	117.81	263.19
	117.81	264.3
	117.81	264.31
	117.81	264.32
	117.81	264.74
	117.81	266.2
	117.81	266.71
	117.81	267.27
	117.81	268.16
	117.81	268.29
	117.81	268.29
	117.81	268.97
	117.81	269.4
	117.81	269.77
	117.81	271.76
	117.81	272.54
	117.81	272.84
	117.81	272.86
	117.81	273.21
	117.81	274.39
	117.81	274.72
	117.81	275.19
	117.81	275.57
	117.81	275.93
	117.81	276.57
	117.81	276.78
	117.81	276.81
	117.81	277.91
	117.81	278.04
	117.81	278.15
	117.81	278.56
	117.81	278.77
	117.81	279.36
	117.81	280.13
	117.81	280.18
	117.81	282.25
	117.81	283.02
	117.81	283.02
	117.81	285.77
	117.81	286.21
	117.81	287.2
	117.81	287.57
	117.81	289.1
	117.81	289.93
	117.81	290.76
	117.81	291.29
	117.81	291.37
	117.81	291.79
	117.81	291.99
	117.81	292.32
	117.81	292.5
	117.81	293.63
	117.81	294.87
	117.81	296.08
	117.81	296.33
	117.81	297.07
	117.81	297.26
	117.81	299.14
	117.81	299.51
	117.81	301.86
	117.81	302.07
	117.81	302.18
	117.81	302.62
	117.81	304.22
	117.81	304.62
	117.81	306.14
	117.81	306.32
	117.81	306.41
	117.81	306.61
	117.81	308.16
	117.81	308.76
	117.81	309.18
	117.81	310.19
	117.81	310.39
	117.81	313.09
	117.81	313.54
	117.81	313.58
	117.81	313.79
	117.81	316.13
	117.81	317.03
	117.81	317.61
	117.81	317.69
	117.81	318.44
	117.81	319.21
	117.81	320.76
	117.81	323.93
	117.81	325.12
	117.81	328.47
	117.81	329.79
	117.81	330
	117.81	330.84
	117.81	331.65
	117.81	338.96
	117.81	342.54
	117.81	346.01
	117.81	349.22
	117.81	349.51
	117.81	356.01
	117.81	356.08
	117.81	356.43
	117.81	356.49
	117.81	359.29
	117.81	360.96
	117.81	363.11
	117.81	363.29
	117.81	365.39
	117.81	369.54
	117.81	373.27
	117.81	373.73
	117.81	385.52
	117.81	387.56
	117.81	387.9
	117.81	388.83
	117.81	389.27
	117.81	389.55
	117.81	390.3
	117.81	390.48
	117.81	393.99
	117.81	394.71
	117.81	395.98
	117.81	396.82
	117.81	396.89
	117.81	397.46
	117.81	401.04
	117.81	401.25
	117.81	404.31
	117.81	404.99
	117.81	405.03
	117.81	408.81
	117.81	412.42
	117.81	414.32
	117.81	415.77
	117.81	423.01
	117.81	424.18
	117.81	425.83
	117.81	427.27
	117.81	427.27
	117.81	427.7
	117.81	427.7
	117.81	430.49
	117.81	430.53
	117.81	430.89
	117.81	433.09
	117.81	433.43
	117.81	433.65
	117.81	437.14
	117.81	440.62
	117.81	448.55
	117.81	449.94
	117.81	452.2
	117.81	456.11
	117.81	459.59
	117.81	459.9
	117.81	461.56
	117.81	469.63
	117.81	470.19
	117.81	470.94
	117.81	471.22
	117.81	473.53
	117.81	474.16
	117.81	474.74
	117.81	479.42
	117.81	480.49
	117.81	482.55
	117.81	482.96
	117.81	483.64
	117.81	483.99
	117.81	487.55
	117.81	487.68
	117.81	489.77
	117.81	489.99
	117.81	489.99
	117.81	490.87
	117.81	492.88
	117.81	493.88
	117.81	494.43
	117.81	496.03
	117.81	496.78
	117.81	497.29
	117.81	497.73
	117.81	499.68
	117.81	500.22
	117.81	500.74
	117.81	500.97
	117.81	502.49
	117.81	502.84
	117.81	504.37
	117.81	504.47
	117.81	505.8
	117.81	507.41
	117.81	507.88
	117.81	510.88
	117.81	511.26
	117.81	511.41
	117.81	512.48
	117.81	514.27
	117.81	518.12
	117.81	518.74
	117.81	519.25
	117.81	520.99
	117.81	521.01
	117.81	521.55
	117.81	521.69
	117.81	524.63
	117.81	525.68
	120.428	147.5
	120.428	152.6
	120.428	160.89
	120.428	164.73
	120.428	167.15
	120.428	172.51
	120.428	173.36
	120.428	181.04
	120.428	184.04
	120.428	184.88
	120.428	187.39
	120.428	194.35
	120.428	195.74
	120.428	196.72
	120.428	197.29
	120.428	197.51
	120.428	200.44
	120.428	200.68
	120.428	203.39
	120.428	205.01
	120.428	205.64
	120.428	208.63
	120.428	209.99
	120.428	215.09
	120.428	217.38
	120.428	220.56
	120.428	221.11
	120.428	224.58
	120.428	225.03
	120.428	225.03
	120.428	225.89
	120.428	226.43
	120.428	228.6
	120.428	229.43
	120.428	229.53
	120.428	230.53
	120.428	230.92
	120.428	232.74
	120.428	240.98
	120.428	241.85
	120.428	242.96
	120.428	247.5
	120.428	248.47
	120.428	249.65
	120.428	251.25
	120.428	252.51
	120.428	256.51
	120.428	260.13
	120.428	265.87
	120.428	266.03
	120.428	279.51
	120.428	283.54
	120.428	286.08
	120.428	291.68
	120.428	300.5
	120.428	303.97
	120.428	324.78
	120.428	331.32
	120.428	345.02
	120.428	388.42
	127.627	172.7
	127.627	183.89
	127.627	183.89
	127.627	190.12
	127.627	193.41
	127.627	199.46
	127.627	215.78
	127.627	218.94
	127.627	230.48
	127.627	234.19
	127.627	240.31
	127.627	240.65
	127.627	247.65
	127.627	250.21
	127.627	276.11
	127.627	276.37
	127.627	280.46
	127.627	283.42
	127.627	287.98
	127.627	291.94
	127.627	292.69
	127.627	299.94
	127.627	308.89
	127.627	308.89
	127.627	317.55
	127.627	335.43
	127.627	343.01
	127.627	343.43
	127.627	355.31
	127.627	360.62
	127.627	362.6
	127.627	370.32
	127.627	370.32
	127.627	372.43
	127.627	377.53
	127.627	377.91
	127.627	406.81
	127.627	408.26
	127.627	417.83
	127.627	422.62
	127.627	426.3
	127.627	428.36
	127.627	433.55
	127.627	438.8
	127.627	443.14
	127.627	443.47
	127.627	447.75
	127.627	452.29
	127.627	456.73
	127.627	463
	127.627	463.47
	127.627	464.22
	127.627	467.93
	127.627	478.61
	127.627	479.73
	127.627	481.96
	127.627	487.91
	127.627	491.43
	127.627	507.28
	127.627	545.08
	132.645	125.3
	132.645	125.3
	132.645	125.73
	132.645	126.94
	132.645	133.19
	132.645	135.51
	132.645	136.62
	132.645	137.26
	132.645	139.46
	132.645	140.09
	132.645	142.3
	132.645	145.14
	132.645	147.12
	132.645	152.74
	132.645	156.28
	132.645	160.54
	132.645	161.9
	132.645	162.78
	132.645	162.78
	132.645	168.25
	132.645	181.01
	132.645	182.31
	132.645	194.61
	132.645	198.39
	132.645	199.96
	132.645	221.74
	132.645	226.84
	132.645	229.5
	132.645	242.47
	132.645	243.81
	132.645	245.54
	132.645	249.63
	132.645	252.92
	132.645	259.57
	132.645	264.52
	132.645	264.95
	132.645	272.37
	132.645	272.46
	132.645	273.75
	132.645	274.18
	132.645	277.49
	132.645	278.33
	132.645	282.38
	132.645	282.65
	132.645	285.26
	132.645	293.5
	132.645	296.17
	132.645	304.97
	132.645	309.11
	132.645	315.55
	132.645	323.6
	132.645	334.53
	138.754	171.41
	138.754	174.39
	138.754	177.75
	138.754	182.73
	138.754	187.84
	138.754	189.73
	138.754	197.05
	138.754	206.37
	138.754	209.71
	138.754	214.44
	138.754	215.35
	138.754	216.21
	138.754	217.73
	138.754	219.58
	138.754	219.89
	138.754	220.69
	138.754	221.43
	138.754	221.51
	138.754	223.88
	138.754	224.82
	138.754	228.3
	138.754	228.87
	138.754	233.9
	138.754	235.65
	138.754	238.04
	138.754	246.75
	138.754	249.01
	138.754	250.04
	138.754	252.92
	138.754	254.49
	138.754	257.81
	138.754	265
	138.754	271.11
	138.754	278.21
	138.754	285.23
	138.754	288.8
	138.754	291.13
	138.754	294.79
	138.754	303.99
[truncated: 397 more rows]

## Sheet: Supplemental Table 2
Sample Number	Normal effective stress (MPa)	Shear displacement (°)	Casting thin section number	Sampling Point No.	Grain size(μm)
Uc5 Db3	2Mpa	120°	1	1	259.43
Uc5 Db3	2Mpa	120°	1	2	101.86
Uc5 Db3	2Mpa	120°	1	3	217.21
Uc5 Db3	2Mpa	120°	1	4	180.32
Uc5 Db3	2Mpa	120°	1	5	272.42
Uc5 Db3	2Mpa	120°	1	6	192.96
Uc5 Db3	2Mpa	120°	1	7	178.49
Uc5 Db3	2Mpa	120°	1	8	215.39
Uc5 Db3	2Mpa	120°	1	9	145.61
Uc5 Db3	2Mpa	120°	1	10	227.61
Uc5 Db3	2Mpa	120°	1	11	176.59
Uc5 Db3	2Mpa	120°	1	12	152.2
Uc5 Db3	2Mpa	120°	1	13	294.52
Uc5 Db3	2Mpa	120°	1	14	192.24
Uc5 Db3	2Mpa	120°	1	15	149.94
Uc5 Db3	2Mpa	120°	1	16	2.5
Uc5 Db3	2Mpa	120°	1	17	13.46
Uc5 Db3	2Mpa	120°	1	18	5
Uc5 Db3	2Mpa	120°	1	19	5.59
Uc5 Db3	2Mpa	120°	1	20	5
Uc5 Db3	2Mpa	120°	1	21	5
Uc5 Db3	2Mpa	120°	1	22	2.5
Uc5 Db3	2Mpa	120°	1	23	2.5
Uc5 Db3	2Mpa	120°	1	24	7.5
Uc5 Db3	2Mpa	120°	1	25	12.5
Uc5 Db3	2Mpa	120°	1	26	10.31
Uc5 Db3	2Mpa	120°	1	27	5.59
Uc5 Db3	2Mpa	120°	1	28	5
Uc5 Db3	2Mpa	120°	1	29	7.5
Uc5 Db3	2Mpa	120°	1	30	5
Uc5 Db3	2Mpa	120°	1	31	57.78
Uc5 Db3	2Mpa	120°	1	32	40.24
Uc5 Db3	2Mpa	120°	1	33	41.93
Uc5 Db3	2Mpa	120°	1	34	25.18
Uc5 Db3	2Mpa	120°	1	35	28.34
Uc5 Db3	2Mpa	120°	1	36	41.67
Uc5 Db3	2Mpa	120°	1	37	35.85
Uc5 Db3	2Mpa	120°	1	38	37.56
Uc5 Db3	2Mpa	120°	1	39	42.19
Uc5 Db3	2Mpa	120°	1	40	46.82
Uc5 Db3	2Mpa	120°	1	41	28.95
Uc5 Db3	2Mpa	120°	1	42	50.35
Uc5 Db3	2Mpa	120°	1	43	43.36
Uc5 Db3	2Mpa	120°	1	44	38.25
Uc5 Db3	2Mpa	120°	1	45	30.76
Uc5 Db3	2Mpa	120°	1	46	176.59
Uc5 Db3	2Mpa	120°	1	47	263.86
Uc5 Db3	2Mpa	120°	1	48	206.32
Uc5 Db3	2Mpa	120°	1	49	172.95
Uc5 Db3	2Mpa	120°	1	50	198.31
Uc5 Db3	2Mpa	120°	1	51	116.85
Uc5 Db3	2Mpa	120°	1	52	174.33
Uc5 Db3	2Mpa	120°	1	53	174.94
Uc5 Db3	2Mpa	120°	1	54	213.83
Uc5 Db3	2Mpa	120°	1	55	173.48
Uc5 Db3	2Mpa	120°	1	56	121.98
Uc5 Db3	2Mpa	120°	1	57	129.58
Uc5 Db3	2Mpa	120°	1	58	129.3
Uc5 Db3	2Mpa	120°	1	59	150.09
Uc5 Db3	2Mpa	120°	1	60	150.23
Ua4 Dd2	2Mpa	120°	1	1	172.95
Ua4 Dd2	2Mpa	120°	1	2	152.97
Ua4 Dd2	2Mpa	120°	1	3	96.38
Ua4 Dd2	2Mpa	120°	1	4	125.64
Ua4 Dd2	2Mpa	120°	1	5	134.89
Ua4 Dd2	2Mpa	120°	1	6	221.54
Ua4 Dd2	2Mpa	120°	1	7	170.79
Ua4 Dd2	2Mpa	120°	1	8	121.78
Ua4 Dd2	2Mpa	120°	1	9	252.32
Ua4 Dd2	2Mpa	120°	1	10	226.82
Ua4 Dd2	2Mpa	120°	1	11	104.94
Ua4 Dd2	2Mpa	120°	1	12	153.16
Ua4 Dd2	2Mpa	120°	1	13	164.48
Ua4 Dd2	2Mpa	120°	1	14	147.43
Ua4 Dd2	2Mpa	120°	1	15	166.09
Ua4 Dd2	2Mpa	120°	1	16	3.12
Ua4 Dd2	2Mpa	120°	1	17	3.12
Ua4 Dd2	2Mpa	120°	1	18	6.25
Ua4 Dd2	2Mpa	120°	1	19	6.25
Ua4 Dd2	2Mpa	120°	1	20	3.12
Ua4 Dd2	2Mpa	120°	1	21	3.13
Ua4 Dd2	2Mpa	120°	1	22	3.13
Ua4 Dd2	2Mpa	120°	1	23	4.42
Ua4 Dd2	2Mpa	120°	1	24	3.13
Ua4 Dd2	2Mpa	120°	1	25	3.13
Ua4 Dd2	2Mpa	120°	1	26	3.12
Ua4 Dd2	2Mpa	120°	1	27	6.25
Ua4 Dd2	2Mpa	120°	1	28	6.99
Ua4 Dd2	2Mpa	120°	1	29	4.42
Ua4 Dd2	2Mpa	120°	1	30	4.42
Ua4 Dd2	2Mpa	120°	1	31	45.11
Ua4 Dd2	2Mpa	120°	1	32	28.53
Ua4 Dd2	2Mpa	120°	1	33	40.73
Ua4 Dd2	2Mpa	120°	1	34	35.56
Ua4 Dd2	2Mpa	120°	1	35	43.05
Ua4 Dd2	2Mpa	120°	1	36	38.2
Ua4 Dd2	2Mpa	120°	1	37	34.76
Ua4 Dd2	2Mpa	120°	1	38	54.13
Ua4 Dd2	2Mpa	120°	1	39	39.08
Ua4 Dd2	2Mpa	120°	1	40	52.07
Ua4 Dd2	2Mpa	120°	1	41	48.59
Ua4 Dd2	2Mpa	120°	1	42	40.35
Ua4 Dd2	2Mpa	120°	1	43	46.13
Ua4 Dd2	2Mpa	120°	1	44	43.77
Ua4 Dd2	2Mpa	120°	1	45	41.65
Ua4 Dd2	2Mpa	120°	1	46	171.24
Ua4 Dd2	2Mpa	120°	1	47	162.13
Ua4 Dd2	2Mpa	120°	1	48	167.74
Ua4 Dd2	2Mpa	120°	1	49	203.3
Ua4 Dd2	2Mpa	120°	1	50	168.82
Ua4 Dd2	2Mpa	120°	1	51	148.93
Ua4 Dd2	2Mpa	120°	1	52	130.06
Ua4 Dd2	2Mpa	120°	1	53	152.78
Ua4 Dd2	2Mpa	120°	1	54	205.95
Ua4 Dd2	2Mpa	120°	1	55	274.45
Ua4 Dd2	2Mpa	120°	1	56	149.07
Ua4 Dd2	2Mpa	120°	1	57	100.96
Ua4 Dd2	2Mpa	120°	1	58	210.36
Ua4 Dd2	2Mpa	120°	1	59	229.73
Ua4 Dd2	2Mpa	120°	1	60	266.38
Uc5 Db3	2Mpa	120°	2	1	125.63
Uc5 Db3	2Mpa	120°	2	2	113.66
Uc5 Db3	2Mpa	120°	2	3	164.77
Uc5 Db3	2Mpa	120°	2	4	106.34
Uc5 Db3	2Mpa	120°	2	5	133.03
Uc5 Db3	2Mpa	120°	2	6	157.13
Uc5 Db3	2Mpa	120°	2	7	158.82
Uc5 Db3	2Mpa	120°	2	8	185.16
Uc5 Db3	2Mpa	120°	2	9	265.87
Uc5 Db3	2Mpa	120°	2	10	147.88
Uc5 Db3	2Mpa	120°	2	11	175.38
Uc5 Db3	2Mpa	120°	2	12	151.57
Uc5 Db3	2Mpa	120°	2	13	157.58
Uc5 Db3	2Mpa	120°	2	14	191.83
Uc5 Db3	2Mpa	120°	2	15	183.99
Uc5 Db3	2Mpa	120°	2	16	8.88
Uc5 Db3	2Mpa	120°	2	17	5.51
Uc5 Db3	2Mpa	120°	2	18	4.93
Uc5 Db3	2Mpa	120°	2	19	5.51
Uc5 Db3	2Mpa	120°	2	20	4.93
Uc5 Db3	2Mpa	120°	2	21	2.46
Uc5 Db3	2Mpa	120°	2	22	4.93
Uc5 Db3	2Mpa	120°	2	23	4.93
Uc5 Db3	2Mpa	120°	2	24	9.85
Uc5 Db3	2Mpa	120°	2	25	4.93
Uc5 Db3	2Mpa	120°	2	26	5.51
Uc5 Db3	2Mpa	120°	2	27	4.93
Uc5 Db3	2Mpa	120°	2	28	7.39
Uc5 Db3	2Mpa	120°	2	29	7.39
Uc5 Db3	2Mpa	120°	2	30	7.79
Uc5 Db3	2Mpa	120°	2	31	54.41
Uc5 Db3	2Mpa	120°	2	32	34.83
Uc5 Db3	2Mpa	120°	2	33	53.06
Uc5 Db3	2Mpa	120°	2	34	40.62
Uc5 Db3	2Mpa	120°	2	35	38.24
Uc5 Db3	2Mpa	120°	2	36	22.71
Uc5 Db3	2Mpa	120°	2	37	46.48
Uc5 Db3	2Mpa	120°	2	38	41.29
Uc5 Db3	2Mpa	120°	2	39	42.09
Uc5 Db3	2Mpa	120°	2	40	35.86
Uc5 Db3	2Mpa	120°	2	41	31.16
Uc5 Db3	2Mpa	120°	2	42	35.27
Uc5 Db3	2Mpa	120°	2	43	45.42
Uc5 Db3	2Mpa	120°	2	44	52.25
Uc5 Db3	2Mpa	120°	2	45	38.24
Uc5 Db3	2Mpa	120°	2	46	205.71
Uc5 Db3	2Mpa	120°	2	47	227.14
Uc5 Db3	2Mpa	120°	2	48	141.11
Uc5 Db3	2Mpa	120°	2	49	149.68
Uc5 Db3	2Mpa	120°	2	50	124.26
Uc5 Db3	2Mpa	120°	2	51	140.42
Uc5 Db3	2Mpa	120°	2	52	271.82
Uc5 Db3	2Mpa	120°	2	53	184.83
Uc5 Db3	2Mpa	120°	2	54	110.3
Uc5 Db3	2Mpa	120°	2	55	104.22
Uc5 Db3	2Mpa	120°	2	56	201.07
Uc5 Db3	2Mpa	120°	2	57	134.94
Uc5 Db3	2Mpa	120°	2	58	270.68
Uc5 Db3	2Mpa	120°	2	59	235.82
Uc5 Db3	2Mpa	120°	2	60	178.56
Ua4 Dd2	2Mpa	120°	2	1	146.3
Ua4 Dd2	2Mpa	120°	2	2	230.16
Ua4 Dd2	2Mpa	120°	2	3	155.89
Ua4 Dd2	2Mpa	120°	2	4	146.39
Ua4 Dd2	2Mpa	120°	2	5	132.64
Ua4 Dd2	2Mpa	120°	2	6	176.74
Ua4 Dd2	2Mpa	120°	2	7	124.84
Ua4 Dd2	2Mpa	120°	2	8	129.61
Ua4 Dd2	2Mpa	120°	2	9	191.63
Ua4 Dd2	2Mpa	120°	2	10	177.89
Ua4 Dd2	2Mpa	120°	2	11	172.27
Ua4 Dd2	2Mpa	120°	2	12	152.36
Ua4 Dd2	2Mpa	120°	2	13	84.97
Ua4 Dd2	2Mpa	120°	2	14	97.96
Ua4 Dd2	2Mpa	120°	2	15	121.1
Ua4 Dd2	2Mpa	120°	2	16	5.97
Ua4 Dd2	2Mpa	120°	2	17	12.31
Ua4 Dd2	2Mpa	120°	2	18	5.97
Ua4 Dd2	2Mpa	120°	2	19	9.44
Ua4 Dd2	2Mpa	120°	2	20	18.16
Ua4 Dd2	2Mpa	120°	2	21	12.31
Ua4 Dd2	2Mpa	120°	2	22	12.31
Ua4 Dd2	2Mpa	120°	2	23	5.97
Ua4 Dd2	2Mpa	120°	2	24	12.31
Ua4 Dd2	2Mpa	120°	2	25	4.22
Ua4 Dd2	2Mpa	120°	2	26	4.22
Ua4 Dd2	2Mpa	120°	2	27	3.98
Ua4 Dd2	2Mpa	120°	2	28	8.2
Ua4 Dd2	2Mpa	120°	2	29	1.99
Ua4 Dd2	2Mpa	120°	2	30	1.99
Ua4 Dd2	2Mpa	120°	2	31	43.02
Ua4 Dd2	2Mpa	120°	2	32	31.12
Ua4 Dd2	2Mpa	120°	2	33	39.78
Ua4 Dd2	2Mpa	120°	2	34	30.36
Ua4 Dd2	2Mpa	120°	2	35	61.38
Ua4 Dd2	2Mpa	120°	2	36	58.48
Ua4 Dd2	2Mpa	120°	2	37	44.68
Ua4 Dd2	2Mpa	120°	2	38	32.79
Ua4 Dd2	2Mpa	120°	2	39	36.56
Ua4 Dd2	2Mpa	120°	2	40	33.33
Ua4 Dd2	2Mpa	120°	2	41	49.11
Ua4 Dd2	2Mpa	120°	2	42	45.43
Ua4 Dd2	2Mpa	120°	2	43	56.94
Ua4 Dd2	2Mpa	120°	2	44	47.8
Ua4 Dd2	2Mpa	120°	2	45	59.12
Ua4 Dd2	2Mpa	120°	2	46	241.93
Ua4 Dd2	2Mpa	120°	2	47	136.55
Ua4 Dd2	2Mpa	120°	2	48	169.92
Ua4 Dd2	2Mpa	120°	2	49	169.92
Ua4 Dd2	2Mpa	120°	2	50	187.1
Ua4 Dd2	2Mpa	120°	2	51	198.09
Ua4 Dd2	2Mpa	120°	2	52	169.88
Ua4 Dd2	2Mpa	120°	2	53	169.13
Ua4 Dd2	2Mpa	120°	2	54	189.5
Ua4 Dd2	2Mpa	120°	2	55	241.24
Ua4 Dd2	2Mpa	120°	2	56	131.59
Ua4 Dd2	2Mpa	120°	2	57	100.64
Ua4 Dd2	2Mpa	120°	2	58	108.62
Ua4 Dd2	2Mpa	120°	2	59	232.54
Ua4 Dd2	2Mpa	120°	2	60	139.39
Uc5 Db3	2Mpa	120°	3	1	263.42
Uc5 Db3	2Mpa	120°	3	2	141.91
Uc5 Db3	2Mpa	120°	3	3	172.01
Uc5 Db3	2Mpa	120°	3	4	133.75
Uc5 Db3	2Mpa	120°	3	5	185.42
Uc5 Db3	2Mpa	120°	3	6	274.65
Uc5 Db3	2Mpa	120°	3	7	145.88
Uc5 Db3	2Mpa	120°	3	8	160.47
Uc5 Db3	2Mpa	120°	3	9	115.01
Uc5 Db3	2Mpa	120°	3	10	135.75
Uc5 Db3	2Mpa	120°	3	11	190.15
Uc5 Db3	2Mpa	120°	3	12	75.01
Uc5 Db3	2Mpa	120°	3	13	138.99
Uc5 Db3	2Mpa	120°	3	14	114.97
Uc5 Db3	2Mpa	120°	3	15	194.09
Uc5 Db3	2Mpa	120°	3	16	4.35
Uc5 Db3	2Mpa	120°	3	17	3.08
Uc5 Db3	2Mpa	120°	3	18	4.35
Uc5 Db3	2Mpa	120°	3	19	3.08
Uc5 Db3	2Mpa	120°	3	20	11.1
Uc5 Db3	2Mpa	120°	3	21	9.73
Uc5 Db3	2Mpa	120°	3	22	3.08
Uc5 Db3	2Mpa	120°	3	23	6.88
Uc5 Db3	2Mpa	120°	3	24	6.15
Uc5 Db3	2Mpa	120°	3	25	6.15
Uc5 Db3	2Mpa	120°	3	26	9.73
Uc5 Db3	2Mpa	120°	3	27	6.15
Uc5 Db3	2Mpa	120°	3	28	6.15
Uc5 Db3	2Mpa	120°	3	29	3.08
Uc5 Db3	2Mpa	120°	3	30	3.08
Uc5 Db3	2Mpa	120°	3	31	52.48
Uc5 Db3	2Mpa	120°	3	32	44.09
Uc5 Db3	2Mpa	120°	3	33	49.46
Uc5 Db3	2Mpa	120°	3	34	57.1
Uc5 Db3	2Mpa	120°	3	35	35.33
Uc5 Db3	2Mpa	120°	3	36	71.01
Uc5 Db3	2Mpa	120°	3	37	75.1
Uc5 Db3	2Mpa	120°	3	38	75.62
Uc5 Db3	2Mpa	120°	3	39	30.3
Uc5 Db3	2Mpa	120°	3	40	38.79
Uc5 Db3	2Mpa	120°	3	41	51.8
Uc5 Db3	2Mpa	120°	3	42	44.45
Uc5 Db3	2Mpa	120°	3	43	44.45
Uc5 Db3	2Mpa	120°	3	44	32.33
Uc5 Db3	2Mpa	120°	3	45	64.66
Uc5 Db3	2Mpa	120°	3	46	150.94
Uc5 Db3	2Mpa	120°	3	47	231.06
Uc5 Db3	2Mpa	120°	3	48	157.69
Uc5 Db3	2Mpa	120°	3	49	86.91
Uc5 Db3	2Mpa	120°	3	50	93.44
Uc5 Db3	2Mpa	120°	3	51	168.82
Uc5 Db3	2Mpa	120°	3	52	121.13
Uc5 Db3	2Mpa	120°	3	53	159.8
Uc5 Db3	2Mpa	120°	3	54	99.16
Uc5 Db3	2Mpa	120°	3	55	80.79
Uc5 Db3	2Mpa	120°	3	56	209.62
Uc5 Db3	2Mpa	120°	3	57	142.94
Uc5 Db3	2Mpa	120°	3	58	74.05
Uc5 Db3	2Mpa	120°	3	59	147.07
Uc5 Db3	2Mpa	120°	3	60	175.94
Ua4 Dd2	2Mpa	120°	3	1	174.21
Ua4 Dd2	2Mpa	120°	3	2	169.38
Ua4 Dd2	2Mpa	120°	3	3	114.37
Ua4 Dd2	2Mpa	120°	3	4	179.38
Ua4 Dd2	2Mpa	120°	3	5	211.18
Ua4 Dd2	2Mpa	120°	3	6	102.88
Ua4 Dd2	2Mpa	120°	3	7	151.18
Ua4 Dd2	2Mpa	120°	3	8	148.38
Ua4 Dd2	2Mpa	120°	3	9	180.57
Ua4 Dd2	2Mpa	120°	3	10	131.59
Ua4 Dd2	2Mpa	120°	3	11	147.11
Ua4 Dd2	2Mpa	120°	3	12	152.46
Ua4 Dd2	2Mpa	120°	3	13	195.59
Ua4 Dd2	2Mpa	120°	3	14	126.96
Ua4 Dd2	2Mpa	120°	3	15	129.42
Ua4 Dd2	2Mpa	120°	3	16	6.15
Ua4 Dd2	2Mpa	120°	3	17	15.38
Ua4 Dd2	2Mpa	120°	3	18	3.08
Ua4 Dd2	2Mpa	120°	3	19	6.15
Ua4 Dd2	2Mpa	120°	3	20	3.08
Ua4 Dd2	2Mpa	120°	3	21	3.08
Ua4 Dd2	2Mpa	120°	3	22	4.35
Ua4 Dd2	2Mpa	120°	3	23	3.08
Ua4 Dd2	2Mpa	120°	3	24	4.35
Ua4 Dd2	2Mpa	120°	3	25	3.08
Ua4 Dd2	2Mpa	120°	3	26	6.15
Ua4 Dd2	2Mpa	120°	3	27	4.35
Ua4 Dd2	2Mpa	120°	3	28	8.71
Ua4 Dd2	2Mpa	120°	3	29	6.15
Ua4 Dd2	2Mpa	120°	3	30	3.08
Ua4 Dd2	2Mpa	120°	3	31	55.79
Ua4 Dd2	2Mpa	120°	3	32	42.82
Ua4 Dd2	2Mpa	120°	3	33	49.94
Ua4 Dd2	2Mpa	120°	3	34	47.34
Ua4 Dd2	2Mpa	120°	3	35	51.27
Ua4 Dd2	2Mpa	120°	3	36	44.17
Ua4 Dd2	2Mpa	120°	3	37	50.65
Ua4 Dd2	2Mpa	120°	3	38	39.82
Ua4 Dd2	2Mpa	120°	3	39	46.76
Ua4 Dd2	2Mpa	120°	3	40	37.65
Ua4 Dd2	2Mpa	120°	3	41	33.07
Ua4 Dd2	2Mpa	120°	3	42	62.91
Ua4 Dd2	2Mpa	120°	3	43	36.97
Ua4 Dd2	2Mpa	120°	3	44	36.34
Ua4 Dd2	2Mpa	120°	3	45	45.4
Ua4 Dd2	2Mpa	120°	3	46	135.4
Ua4 Dd2	2Mpa	120°	3	47	254.33
Ua4 Dd2	2Mpa	120°	3	48	198.97
Ua4 Dd2	2Mpa	120°	3	49	174.56
Ua4 Dd2	2Mpa	120°	3	50	183.49
Ua4 Dd2	2Mpa	120°	3	51	230.43
Ua4 Dd2	2Mpa	120°	3	52	204.51
Ua4 Dd2	2Mpa	120°	3	53	213.36
Ua4 Dd2	2Mpa	120°	3	54	184.88
Ua4 Dd2	2Mpa	120°	3	55	183.07
Ua4 Dd2	2Mpa	120°	3	56	217.4
Ua4 Dd2	2Mpa	120°	3	57	193.82
Ua4 Dd2	2Mpa	120°	3	58	166.21
Ua4 Dd2	2Mpa	120°	3	59	123.17
Ua4 Dd2	2Mpa	120°	3	60	193.89
Uc5 Db3	2Mpa	120°	4	1	215.49
Uc5 Db3	2Mpa	120°	4	2	205.5
Uc5 Db3	2Mpa	120°	4	3	210.22
Uc5 Db3	2Mpa	120°	4	4	286.24
Uc5 Db3	2Mpa	120°	4	5	268.25
Uc5 Db3	2Mpa	120°	4	6	229.17
Uc5 Db3	2Mpa	120°	4	7	170.1
Uc5 Db3	2Mpa	120°	4	8	252.43
Uc5 Db3	2Mpa	120°	4	9	235.93
Uc5 Db3	2Mpa	120°	4	10	149.49
Uc5 Db3	2Mpa	120°	4	11	207.35
Uc5 Db3	2Mpa	120°	4	12	230.93
Uc5 Db3	2Mpa	120°	4	13	293.54
Uc5 Db3	2Mpa	120°	4	14	140.57
Uc5 Db3	2Mpa	120°	4	15	144.65
Uc5 Db3	2Mpa	120°	4	16	9.37
Uc5 Db3	2Mpa	120°	4	17	3.12
Uc5 Db3	2Mpa	120°	4	18	6.99
Uc5 Db3	2Mpa	120°	4	19	3.12
Uc5 Db3	2Mpa	120°	4	20	6.25
Uc5 Db3	2Mpa	120°	4	21	3.12
Uc5 Db3	2Mpa	120°	4	22	6.99
Uc5 Db3	2Mpa	120°	4	23	12.5
Uc5 Db3	2Mpa	120°	4	24	3.12
Uc5 Db3	2Mpa	120°	4	25	4.42
Uc5 Db3	2Mpa	120°	4	26	3.12
Uc5 Db3	2Mpa	120°	4	27	6.99
Uc5 Db3	2Mpa	120°	4	28	9.88
Uc5 Db3	2Mpa	120°	4	29	6.99
Uc5 Db3	2Mpa	120°	4	30	3.12
Uc5 Db3	2Mpa	120°	4	31	53.12
Uc5 Db3	2Mpa	120°	4	32	42.95
Uc5 Db3	2Mpa	120°	4	33	48.46
Uc5 Db3	2Mpa	120°	4	34	42.95
Uc5 Db3	2Mpa	120°	4	35	52.26
Uc5 Db3	2Mpa	120°	4	36	40.08
Uc5 Db3	2Mpa	120°	4	37	54.09
Uc5 Db3	2Mpa	120°	4	38	50.4
Uc5 Db3	2Mpa	120°	4	39	60.57
Uc5 Db3	2Mpa	120°	4	40	78.63
Uc5 Db3	2Mpa	120°	4	41	40.08
Uc5 Db3	2Mpa	120°	4	42	57.78
Uc5 Db3	2Mpa	120°	4	43	49.4
Uc5 Db3	2Mpa	120°	4	44	30.34
Uc5 Db3	2Mpa	120°	4	45	38.25
Uc5 Db3	2Mpa	120°	4	46	273.5
Uc5 Db3	2Mpa	120°	4	47	199.14
Uc5 Db3	2Mpa	120°	4	48	263.41
Uc5 Db3	2Mpa	120°	4	49	139.86
Uc5 Db3	2Mpa	120°	4	50	156.67
Uc5 Db3	2Mpa	120°	4	51	186.42
Uc5 Db3	2Mpa	120°	4	52	325.96
Uc5 Db3	2Mpa	120°	4	53	216.85
Uc5 Db3	2Mpa	120°	4	54	162.51
Uc5 Db3	2Mpa	120°	4	55	171.39
Uc5 Db3	2Mpa	120°	4	56	129.29
Uc5 Db3	2Mpa	120°	4	57	117.06
Uc5 Db3	2Mpa	120°	4	58	110.9
Uc5 Db3	2Mpa	120°	4	59	135.85
Uc5 Db3	2Mpa	120°	4	60	166.6
Ua4 Dd2	2Mpa	120°	4	1	240.01
Ua4 Dd2	2Mpa	120°	4	2	318.84
Ua4 Dd2	2Mpa	120°	4	3	176.18
Ua4 Dd2	2Mpa	120°	4	4	280.37
Ua4 Dd2	2Mpa	120°	4	5	98.01
Ua4 Dd2	2Mpa	120°	4	6	166.19
Ua4 Dd2	2Mpa	120°	4	7	195.16
Ua4 Dd2	2Mpa	120°	4	8	235.84
Ua4 Dd2	2Mpa	120°	4	9	236.23
Ua4 Dd2	2Mpa	120°	4	10	231.72
Ua4 Dd2	2Mpa	120°	4	11	130.39
Ua4 Dd2	2Mpa	120°	4	12	137.32
Ua4 Dd2	2Mpa	120°	4	13	152.95
Ua4 Dd2	2Mpa	120°	4	14	177.87
Ua4 Dd2	2Mpa	120°	4	15	149.26
Ua4 Dd2	2Mpa	120°	4	16	12.5
Ua4 Dd2	2Mpa	120°	4	17	6.78
Ua4 Dd2	2Mpa	120°	4	18	9.58
Ua4 Dd2	2Mpa	120°	4	19	9.58
Ua4 Dd2	2Mpa	120°	4	20	6.06
Ua4 Dd2	2Mpa	120°	4	21	6.06
Ua4 Dd2	2Mpa	120°	4	22	3.03
Ua4 Dd2	2Mpa	120°	4	23	3.03
Ua4 Dd2	2Mpa	120°	4	24	9.58
Ua4 Dd2	2Mpa	120°	4	25	9.58
Ua4 Dd2	2Mpa	120°	4	26	13.56
Ua4 Dd2	2Mpa	120°	4	27	6.06
Ua4 Dd2	2Mpa	120°	4	28	12.5
Ua4 Dd2	2Mpa	120°	4	29	10.93
Ua4 Dd2	2Mpa	120°	4	30	3.03
Ua4 Dd2	2Mpa	120°	4	31	50.48
Ua4 Dd2	2Mpa	120°	4	32	56.12
Ua4 Dd2	2Mpa	120°	4	33	46.11
Ua4 Dd2	2Mpa	120°	4	34	30.3
Ua4 Dd2	2Mpa	120°	4	35	52.12
Ua4 Dd2	2Mpa	120°	4	36	58.26
Ua4 Dd2	2Mpa	120°	4	37	55.46
Ua4 Dd2	2Mpa	120°	4	38	50.62
Ua4 Dd2	2Mpa	120°	4	39	52.67
Ua4 Dd2	2Mpa	120°	4	40	56.12
Ua4 Dd2	2Mpa	120°	4	41	29.82
Ua4 Dd2	2Mpa	120°	4	42	30.83
Ua4 Dd2	2Mpa	120°	4	43	25.87
Ua4 Dd2	2Mpa	120°	4	44	37.24
Ua4 Dd2	2Mpa	120°	4	45	37.08
Ua4 Dd2	2Mpa	120°	4	46	184.93
Ua4 Dd2	2Mpa	120°	4	47	125.58
Ua4 Dd2	2Mpa	120°	4	48	141.17
Ua4 Dd2	2Mpa	120°	4	49	141.01
Ua4 Dd2	2Mpa	120°	4	50	141.76
Ua4 Dd2	2Mpa	120°	4	51	190.2
Ua4 Dd2	2Mpa	120°	4	52	143.46
Ua4 Dd2	2Mpa	120°	4	53	137.82
Ua4 Dd2	2Mpa	120°	4	54	207.18
Ua4 Dd2	2Mpa	120°	4	55	120.26
Ua4 Dd2	2Mpa	120°	4	56	89.98
Ua4 Dd2	2Mpa	120°	4	57	160.36
Ua4 Dd2	2Mpa	120°	4	58	121.26
Ua4 Dd2	2Mpa	120°	4	59	162.77
Ua4 Dd2	2Mpa	120°	4	60	156.45
Uc5 Db3	2Mpa	120°	5	1	218.1
Uc5 Db3	2Mpa	120°	5	2	145.47
Uc5 Db3	2Mpa	120°	5	3	212.68
Uc5 Db3	2Mpa	120°	5	4	245.06
Uc5 Db3	2Mpa	120°	5	5	156.28
Uc5 Db3	2Mpa	120°	5	6	189
Uc5 Db3	2Mpa	120°	5	7	158.01
Uc5 Db3	2Mpa	120°	5	8	159.51
Uc5 Db3	2Mpa	120°	5	9	206.79
Uc5 Db3	2Mpa	120°	5	10	210.84
Uc5 Db3	2Mpa	120°	5	11	120.03
Uc5 Db3	2Mpa	120°	5	12	147.47
Uc5 Db3	2Mpa	120°	5	13	134.07
Uc5 Db3	2Mpa	120°	5	14	176.92
Uc5 Db3	2Mpa	120°	5	15	160.61
Uc5 Db3	2Mpa	120°	5	16	5
Uc5 Db3	2Mpa	120°	5	17	5
Uc5 Db3	2Mpa	120°	5	18	2.5
Uc5 Db3	2Mpa	120°	5	19	2.5
Uc5 Db3	2Mpa	120°	5	20	5
Uc5 Db3	2Mpa	120°	5	21	5
Uc5 Db3	2Mpa	120°	5	22	5
Uc5 Db3	2Mpa	120°	5	23	5.59
Uc5 Db3	2Mpa	120°	5	24	5
Uc5 Db3	2Mpa	120°	5	25	7.91
Uc5 Db3	2Mpa	120°	5	26	7.5
Uc5 Db3	2Mpa	120°	5	27	2.5
Uc5 Db3	2Mpa	120°	5	28	5.59
Uc5 Db3	2Mpa	120°	5	29	2.5
Uc5 Db3	2Mpa	120°	5	30	3.54
Uc5 Db3	2Mpa	120°	5	31	49.52
Uc5 Db3	2Mpa	120°	5	32	64.54
Uc5 Db3	2Mpa	120°	5	33	61.92
Uc5 Db3	2Mpa	120°	5	34	53.18
Uc5 Db3	2Mpa	120°	5	35	38.91
Uc5 Db3	2Mpa	120°	5	36	33.65
Uc5 Db3	2Mpa	120°	5	37	37.18
Uc5 Db3	2Mpa	120°	5	38	46.53
Uc5 Db3	2Mpa	120°	5	39	54.85
Uc5 Db3	2Mpa	120°	5	40	44.25
Uc5 Db3	2Mpa	120°	5	41	42.59
Uc5 Db3	2Mpa	120°	5	42	45.98
Uc5 Db3	2Mpa	120°	5	43	51.32
Uc5 Db3	2Mpa	120°	5	44	63.76
Uc5 Db3	2Mpa	120°	5	45	49.64
Uc5 Db3	2Mpa	120°	5	46	217.46
Uc5 Db3	2Mpa	120°	5	47	135.31
Uc5 Db3	2Mpa	120°	5	48	166.95
Uc5 Db3	2Mpa	120°	5	49	189.65
Uc5 Db3	2Mpa	120°	5	50	214.01
Uc5 Db3	2Mpa	120°	5	51	211.04
Uc5 Db3	2Mpa	120°	5	52	192.41
Uc5 Db3	2Mpa	120°	5	53	173.56
Uc5 Db3	2Mpa	120°	5	54	110.26
Uc5 Db3	2Mpa	120°	5	55	256.49
Uc5 Db3	2Mpa	120°	5	56	180.31
Uc5 Db3	2Mpa	120°	5	57	185.31
Uc5 Db3	2Mpa	120°	5	58	291.43
Uc5 Db3	2Mpa	120°	5	59	288.04
Uc5 Db3	2Mpa	120°	5	60	187.96
Ua4 Dd2	2Mpa	120°	5	1	217.34
Ua4 Dd2	2Mpa	120°	5	2	186.94
Ua4 Dd2	2Mpa	120°	5	3	289.69
Ua4 Dd2	2Mpa	120°	5	4	159.48
Ua4 Dd2	2Mpa	120°	5	5	242.86
Ua4 Dd2	2Mpa	120°	5	6	129.6
Ua4 Dd2	2Mpa	120°	5	7	122.57
Ua4 Dd2	2Mpa	120°	5	8	161.63
Ua4 Dd2	2Mpa	120°	5	9	193.61
Ua4 Dd2	2Mpa	120°	5	10	146.52
Ua4 Dd2	2Mpa	120°	5	11	200.18
Ua4 Dd2	2Mpa	120°	5	12	152.14
Ua4 Dd2	2Mpa	120°	5	13	176.23
Ua4 Dd2	2Mpa	120°	5	14	131.54
Ua4 Dd2	2Mpa	120°	5	15	152.24
Ua4 Dd2	2Mpa	120°	5	16	8.96
Ua4 Dd2	2Mpa	120°	5	17	6.68
Ua4 Dd2	2Mpa	120°	5	18	2.99
Ua4 Dd2	2Mpa	120°	5	19	14.93
Ua4 Dd2	2Mpa	120°	5	20	2.99
Ua4 Dd2	2Mpa	120°	5	21	2.99
Ua4 Dd2	2Mpa	120°	5	22	9.44
Ua4 Dd2	2Mpa	120°	5	23	21.11
Ua4 Dd2	2Mpa	120°	5	24	6.68
Ua4 Dd2	2Mpa	120°	5	25	2.99
Ua4 Dd2	2Mpa	120°	5	26	20.9
Ua4 Dd2	2Mpa	120°	5	27	2.99
Ua4 Dd2	2Mpa	120°	5	28	15.22
Ua4 Dd2	2Mpa	120°	5	29	8.96
Ua4 Dd2	2Mpa	120°	5	30	6.68
Ua4 Dd2	2Mpa	120°	5	31	41.11
Ua4 Dd2	2Mpa	120°	5	32	47.32
Ua4 Dd2	2Mpa	120°	5	33	37.78
Ua4 Dd2	2Mpa	120°	5	34	35.53
Ua4 Dd2	2Mpa	120°	5	35	47.45
Ua4 Dd2	2Mpa	120°	5	36	30.6
Ua4 Dd2	2Mpa	120°	5	37	34.21
Ua4 Dd2	2Mpa	120°	5	38	38.53
Ua4 Dd2	2Mpa	120°	5	39	39.77
Ua4 Dd2	2Mpa	120°	5	40	29.94
Ua4 Dd2	2Mpa	120°	5	41	33.19
Ua4 Dd2	2Mpa	120°	5	42	62.7
Ua4 Dd2	2Mpa	120°	5	43	43.08
Ua4 Dd2	2Mpa	120°	5	44	34.21
Ua4 Dd2	2Mpa	120°	5	45	52.46
Ua4 Dd2	2Mpa	120°	5	46	154.16
Ua4 Dd2	2Mpa	120°	5	47	199.86
Ua4 Dd2	2Mpa	120°	5	48	185.1
Ua4 Dd2	2Mpa	120°	5	49	186.27
Ua4 Dd2	2Mpa	120°	5	50	238.64
Ua4 Dd2	2Mpa	120°	5	51	158.32
Ua4 Dd2	2Mpa	120°	5	52	254.55
Ua4 Dd2	2Mpa	120°	5	53	206.3
Ua4 Dd2	2Mpa	120°	5	54	143.36
Ua4 Dd2	2Mpa	120°	5	55	125.02
Ua4 Dd2	2Mpa	120°	5	56	130.15
Ua4 Dd2	2Mpa	120°	5	57	128.09
Ua4 Dd2	2Mpa	120°	5	58	140.52
Ua4 Dd2	2Mpa	120°	5	59	133.66
Ua4 Dd2	2Mpa	120°	5	60	163.71
Ub2 Dd4	2Mpa	150°	1	1	311.09
Ub2 Dd4	2Mpa	150°	1	2	217.41
Ub2 Dd4	2Mpa	150°	1	3	199.01
Ub2 Dd4	2Mpa	150°	1	4	123.92
Ub2 Dd4	2Mpa	150°	1	5	193.57
Ub2 Dd4	2Mpa	150°	1	6	238.38
Ub2 Dd4	2Mpa	150°	1	7	268.18
Ub2 Dd4	2Mpa	150°	1	8	188.9
Ub2 Dd4	2Mpa	150°	1	9	221.86
Ub2 Dd4	2Mpa	150°	1	10	241.32
Ub2 Dd4	2Mpa	150°	1	11	122.43
Ub2 Dd4	2Mpa	150°	1	12	193.9
Ub2 Dd4	2Mpa	150°	1	13	157.28
Ub2 Dd4	2Mpa	150°	1	14	113.73
Ub2 Dd4	2Mpa	150°	1	15	212.05
Ub2 Dd4	2Mpa	150°	1	16	2.9
Ub2 Dd4	2Mpa	150°	1	17	11.6
Ub2 Dd4	2Mpa	150°	1	18	6.49
Ub2 Dd4	2Mpa	150°	1	19	9.17
Ub2 Dd4	2Mpa	150°	1	20	11.96
Ub2 Dd4	2Mpa	150°	1	21	8.7
Ub2 Dd4	2Mpa	150°	1	22	7.4
Ub2 Dd4	2Mpa	150°	1	23	7.4
Ub2 Dd4	2Mpa	150°	1	24	6.49
Ub2 Dd4	2Mpa	150°	1	25	2.05
Ub2 Dd4	2Mpa	150°	1	26	8.46
Ub2 Dd4	2Mpa	150°	1	27	2.9
Ub2 Dd4	2Mpa	150°	1	28	7.4
Ub2 Dd4	2Mpa	150°	1	29	2.05
Ub2 Dd4	2Mpa	150°	1	30	2.05
Ub2 Dd4	2Mpa	150°	1	31	43.47
Ub2 Dd4	2Mpa	150°	1	32	54.15
Ub2 Dd4	2Mpa	150°	1	33	36.98
Ub2 Dd4	2Mpa	150°	1	34	58.74
Ub2 Dd4	2Mpa	150°	1	35	53.84
Ub2 Dd4	2Mpa	150°	1	36	43.12
Ub2 Dd4	2Mpa	150°	1	37	58.38
Ub2 Dd4	2Mpa	150°	1	38	61.47
Ub2 Dd4	2Mpa	150°	1	39	45.87
Ub2 Dd4	2Mpa	150°	1	40	46.28
Ub2 Dd4	2Mpa	150°	1	41	38.92
Ub2 Dd4	2Mpa	150°	1	42	46.1
Ub2 Dd4	2Mpa	150°	1	43	46.09
Ub2 Dd4	2Mpa	150°	1	44	42.83
Ub2 Dd4	2Mpa	150°	1	45	58.74
Ub2 Dd4	2Mpa	150°	1	46	145.83
Ub2 Dd4	2Mpa	150°	1	47	119.58
Ub2 Dd4	2Mpa	150°	1	48	185.01
Ub2 Dd4	2Mpa	150°	1	49	247.6
Ub2 Dd4	2Mpa	150°	1	50	215.34
Ub2 Dd4	2Mpa	150°	1	51	152.34
Ub2 Dd4	2Mpa	150°	1	52	138.91
Ub2 Dd4	2Mpa	150°	1	53	141.27
Ub2 Dd4	2Mpa	150°	1	54	172.85
Ub2 Dd4	2Mpa	150°	1	55	153.91
Ub2 Dd4	2Mpa	150°	1	56	131.35
Ub2 Dd4	2Mpa	150°	1	57	142.81
Ub2 Dd4	2Mpa	150°	1	58	211.72
Ub2 Dd4	2Mpa	150°	1	59	190.95
Ub2 Dd4	2Mpa	150°	1	60	123.91
Uc2 Da4	2Mpa	150°	1	1	159.78
Uc2 Da4	2Mpa	150°	1	2	153.77
Uc2 Da4	2Mpa	150°	1	3	229.67
Uc2 Da4	2Mpa	150°	1	4	130.15
Uc2 Da4	2Mpa	150°	1	5	222.4
Uc2 Da4	2Mpa	150°	1	6	321.33
Uc2 Da4	2Mpa	150°	1	7	231.03
Uc2 Da4	2Mpa	150°	1	8	229.25
Uc2 Da4	2Mpa	150°	1	9	243.84
Uc2 Da4	2Mpa	150°	1	10	268.08
Uc2 Da4	2Mpa	150°	1	11	156.9
Uc2 Da4	2Mpa	150°	1	12	213.08
Uc2 Da4	2Mpa	150°	1	13	119.1
Uc2 Da4	2Mpa	150°	1	14	102.02
Uc2 Da4	2Mpa	150°	1	15	171.29
Uc2 Da4	2Mpa	150°	1	16	3.23
Uc2 Da4	2Mpa	150°	1	17	4.56
Uc2 Da4	2Mpa	150°	1	18	4.56
Uc2 Da4	2Mpa	150°	1	19	4.56
Uc2 Da4	2Mpa	150°	1	20	6.45
Uc2 Da4	2Mpa	150°	1	21	6.45
Uc2 Da4	2Mpa	150°	1	22	3.23
Uc2 Da4	2Mpa	150°	1	23	4.56
Uc2 Da4	2Mpa	150°	1	24	9.68
Uc2 Da4	2Mpa	150°	1	25	7.21
Uc2 Da4	2Mpa	150°	1	26	9.13
Uc2 Da4	2Mpa	150°	1	27	9.13
Uc2 Da4	2Mpa	150°	1	28	13.69
Uc2 Da4	2Mpa	150°	1	29	11.64
Uc2 Da4	2Mpa	150°	1	30	9.13
Uc2 Da4	2Mpa	150°	1	31	51.04
Uc2 Da4	2Mpa	150°	1	32	51.04
Uc2 Da4	2Mpa	150°	1	33	44.34
Uc2 Da4	2Mpa	150°	1	34	46.39
Uc2 Da4	2Mpa	150°	1	35	47.68
Uc2 Da4	2Mpa	150°	1	36	43.61
Uc2 Da4	2Mpa	150°	1	37	38.34
Uc2 Da4	2Mpa	150°	1	38	35.05
Uc2 Da4	2Mpa	150°	1	39	40.46
Uc2 Da4	2Mpa	150°	1	40	35.65
Uc2 Da4	2Mpa	150°	1	41	51.2
Uc2 Da4	2Mpa	150°	1	42	42.42
Uc2 Da4	2Mpa	150°	1	43	42.47
Uc2 Da4	2Mpa	150°	1	44	50.09
Uc2 Da4	2Mpa	150°	1	45	45.28
Uc2 Da4	2Mpa	150°	1	46	211.83
Uc2 Da4	2Mpa	150°	1	47	334.03
Uc2 Da4	2Mpa	150°	1	48	212.48
Uc2 Da4	2Mpa	150°	1	49	207.62
Uc2 Da4	2Mpa	150°	1	50	196.59
Uc2 Da4	2Mpa	150°	1	51	174.5
Uc2 Da4	2Mpa	150°	1	52	225.61
Uc2 Da4	2Mpa	150°	1	53	112.03
Uc2 Da4	2Mpa	150°	1	54	149.62
Uc2 Da4	2Mpa	150°	1	55	146.78
Uc2 Da4	2Mpa	150°	1	56	142.59
Uc2 Da4	2Mpa	150°	1	57	256.23
Uc2 Da4	2Mpa	150°	1	58	178.25
Uc2 Da4	2Mpa	150°	1	59	148.76
Uc2 Da4	2Mpa	150°	1	60	124.91
Ub2 Dd4	2Mpa	150°	2	1	138.75
Ub2 Dd4	2Mpa	150°	2	2	113.3
Ub2 Dd4	2Mpa	150°	2	3	174.86
Ub2 Dd4	2Mpa	150°	2	4	188.46
Ub2 Dd4	2Mpa	150°	2	5	166.22
Ub2 Dd4	2Mpa	150°	2	6	169.97
Ub2 Dd4	2Mpa	150°	2	7	123.49
Ub2 Dd4	2Mpa	150°	2	8	119.78
Ub2 Dd4	2Mpa	150°	2	9	151.44
Ub2 Dd4	2Mpa	150°	2	10	173.4
Ub2 Dd4	2Mpa	150°	2	11	192.16
Ub2 Dd4	2Mpa	150°	2	12	189.45
Ub2 Dd4	2Mpa	150°	2	13	218.87
Ub2 Dd4	2Mpa	150°	2	14	177.85
Ub2 Dd4	2Mpa	150°	2	15	140.5
Ub2 Dd4	2Mpa	150°	2	16	3.99
Ub2 Dd4	2Mpa	150°	2	17	8.22
Ub2 Dd4	2Mpa	150°	2	18	4.45
Ub2 Dd4	2Mpa	150°	2	19	1.99
Ub2 Dd4	2Mpa	150°	2	20	3.98
Ub2 Dd4	2Mpa	150°	2	21	1.99
Ub2 Dd4	2Mpa	150°	2	22	1.99
Ub2 Dd4	2Mpa	150°	2	23	5.63
Ub2 Dd4	2Mpa	150°	2	24	2.82
Ub2 Dd4	2Mpa	150°	2	25	5.63
Ub2 Dd4	2Mpa	150°	2	26	2.82
Ub2 Dd4	2Mpa	150°	2	27	1.99
Ub2 Dd4	2Mpa	150°	2	28	2.82
Ub2 Dd4	2Mpa	150°	2	29	3.98
Ub2 Dd4	2Mpa	150°	2	30	2.82
Ub2 Dd4	2Mpa	150°	2	31	59.11
Ub2 Dd4	2Mpa	150°	2	32	46.44
Ub2 Dd4	2Mpa	150°	2	33	29.61
Ub2 Dd4	2Mpa	150°	2	34	47
Ub2 Dd4	2Mpa	150°	2	35	69.7
Ub2 Dd4	2Mpa	150°	2	36	65.01
Ub2 Dd4	2Mpa	150°	2	37	33.37
Ub2 Dd4	2Mpa	150°	2	38	40.32
Ub2 Dd4	2Mpa	150°	2	39	52.61
Ub2 Dd4	2Mpa	150°	2	40	30.4
Ub2 Dd4	2Mpa	150°	2	41	37.57
Ub2 Dd4	2Mpa	150°	2	42	51.77
Ub2 Dd4	2Mpa	150°	2	43	48.62
Ub2 Dd4	2Mpa	150°	2	44	30.4
Ub2 Dd4	2Mpa	150°	2	45	42.75
Ub2 Dd4	2Mpa	150°	2	46	191.79
Ub2 Dd4	2Mpa	150°	2	47	193.6
Ub2 Dd4	2Mpa	150°	2	48	181.43
Ub2 Dd4	2Mpa	150°	2	49	164.54
Ub2 Dd4	2Mpa	150°	2	50	165.76
Ub2 Dd4	2Mpa	150°	2	51	167.57
Ub2 Dd4	2Mpa	150°	2	52	180.03
Ub2 Dd4	2Mpa	150°	2	53	174.22
Ub2 Dd4	2Mpa	150°	2	54	143.66
Ub2 Dd4	2Mpa	150°	2	55	223.32
Ub2 Dd4	2Mpa	150°	2	56	177.28
Ub2 Dd4	2Mpa	150°	2	57	220.85
Ub2 Dd4	2Mpa	150°	2	58	104.31
Ub2 Dd4	2Mpa	150°	2	59	179.49
Ub2 Dd4	2Mpa	150°	2	60	125.57
Uc2 Da4	2Mpa	150°	2	1	172.76
Uc2 Da4	2Mpa	150°	2	2	138.84
Uc2 Da4	2Mpa	150°	2	3	155.46
Uc2 Da4	2Mpa	150°	2	4	195.57
Uc2 Da4	2Mpa	150°	2	5	125.46
Uc2 Da4	2Mpa	150°	2	6	131.94
Uc2 Da4	2Mpa	150°	2	7	152.06
Uc2 Da4	2Mpa	150°	2	8	127.42
Uc2 Da4	2Mpa	150°	2	9	174.96
Uc2 Da4	2Mpa	150°	2	10	176.17
Uc2 Da4	2Mpa	150°	2	11	101.04
Uc2 Da4	2Mpa	150°	2	12	118.97
Uc2 Da4	2Mpa	150°	2	13	133.57
Uc2 Da4	2Mpa	150°	2	14	128.27
Uc2 Da4	2Mpa	150°	2	15	144.96
Uc2 Da4	2Mpa	150°	2	16	2.81
Uc2 Da4	2Mpa	150°	2	17	2.81
Uc2 Da4	2Mpa	150°	2	18	1.99
Uc2 Da4	2Mpa	150°	2	19	6.29
Uc2 Da4	2Mpa	150°	2	20	8.2
Uc2 Da4	2Mpa	150°	2	21	2.81
Uc2 Da4	2Mpa	150°	2	22	1.99
Uc2 Da4	2Mpa	150°	2	23	3.98
Uc2 Da4	2Mpa	150°	2	24	1.99
Uc2 Da4	2Mpa	150°	2	25	1.99
Uc2 Da4	2Mpa	150°	2	26	5.96
Uc2 Da4	2Mpa	150°	2	27	1.99
Uc2 Da4	2Mpa	150°	2	28	4.45
Uc2 Da4	2Mpa	150°	2	29	14.06
Uc2 Da4	2Mpa	150°	2	30	2.81
Uc2 Da4	2Mpa	150°	2	31	40.21
Uc2 Da4	2Mpa	150°	2	32	50.33
Uc2 Da4	2Mpa	150°	2	33	44.86
Uc2 Da4	2Mpa	150°	2	34	28.47
Uc2 Da4	2Mpa	150°	2	35	32.06
Uc2 Da4	2Mpa	150°	2	36	38.24
Uc2 Da4	2Mpa	150°	2	37	68.64
Uc2 Da4	2Mpa	150°	2	38	75.71
Uc2 Da4	2Mpa	150°	2	39	41.52
Uc2 Da4	2Mpa	150°	2	40	36.66
Uc2 Da4	2Mpa	150°	2	41	51.12
Uc2 Da4	2Mpa	150°	2	42	42.17
Uc2 Da4	2Mpa	150°	2	43	46.11
Uc2 Da4	2Mpa	150°	2	44	50.06
Uc2 Da4	2Mpa	150°	2	45	34.32
Uc2 Da4	2Mpa	150°	2	46	174.1
Uc2 Da4	2Mpa	150°	2	47	147.58
Uc2 Da4	2Mpa	150°	2	48	123.76
Uc2 Da4	2Mpa	150°	2	49	199.29
Uc2 Da4	2Mpa	150°	2	50	103.79
Uc2 Da4	2Mpa	150°	2	51	169.23
Uc2 Da4	2Mpa	150°	2	52	125.32
Uc2 Da4	2Mpa	150°	2	53	191.87
Uc2 Da4	2Mpa	150°	2	54	171.74
Uc2 Da4	2Mpa	150°	2	55	178.97
Uc2 Da4	2Mpa	150°	2	56	125.26
Uc2 Da4	2Mpa	150°	2	57	173.93
Uc2 Da4	2Mpa	150°	2	58	164.77
Uc2 Da4	2Mpa	150°	2	59	257.63
Uc2 Da4	2Mpa	150°	2	60	120.29
Ub2 Dd4	2Mpa	150°	3	1	276.39
Ub2 Dd4	2Mpa	150°	3	2	152.58
Ub2 Dd4	2Mpa	150°	3	3	219.19
Ub2 Dd4	2Mpa	150°	3	4	189.9
Ub2 Dd4	2Mpa	150°	3	5	213.88
Ub2 Dd4	2Mpa	150°	3	6	206.59
Ub2 Dd4	2Mpa	150°	3	7	177.9
Ub2 Dd4	2Mpa	150°	3	8	265.46
Ub2 Dd4	2Mpa	150°	3	9	144.2
Ub2 Dd4	2Mpa	150°	3	10	229.45
Ub2 Dd4	2Mpa	150°	3	11	250.44
Ub2 Dd4	2Mpa	150°	3	12	193.1
Ub2 Dd4	2Mpa	150°	3	13	229.44
Ub2 Dd4	2Mpa	150°	3	14	227.02
Ub2 Dd4	2Mpa	150°	3	15	159.43
Ub2 Dd4	2Mpa	150°	3	16	6.26
Ub2 Dd4	2Mpa	150°	3	17	3.13
Ub2 Dd4	2Mpa	150°	3	18	6.25
Ub2 Dd4	2Mpa	150°	3	19	13.98
Ub2 Dd4	2Mpa	150°	3	20	15.63
Ub2 Dd4	2Mpa	150°	3	21	6.25
Ub2 Dd4	2Mpa	150°	3	22	11.28
Ub2 Dd4	2Mpa	150°	3	23	9.39
Ub2 Dd4	2Mpa	150°	3	24	6.26
Ub2 Dd4	2Mpa	150°	3	25	12.9
Ub2 Dd4	2Mpa	150°	3	26	6.26
Ub2 Dd4	2Mpa	150°	3	27	4.42
Ub2 Dd4	2Mpa	150°	3	28	11.27
Ub2 Dd4	2Mpa	150°	3	29	6.26
Ub2 Dd4	2Mpa	150°	3	30	4.42
Ub2 Dd4	2Mpa	150°	3	31	47.15
Ub2 Dd4	2Mpa	150°	3	32	45.7
Ub2 Dd4	2Mpa	150°	3	33	59.01
Ub2 Dd4	2Mpa	150°	3	34	35.36
Ub2 Dd4	2Mpa	150°	3	35	47.24
Ub2 Dd4	2Mpa	150°	3	36	35.36
Ub2 Dd4	2Mpa	150°	3	37	36.86
Ub2 Dd4	2Mpa	150°	3	38	57.48
Ub2 Dd4	2Mpa	150°	3	39	45.89
Ub2 Dd4	2Mpa	150°	3	40	38.31
Ub2 Dd4	2Mpa	150°	3	41	43.96
Ub2 Dd4	2Mpa	150°	3	42	27.17
Ub2 Dd4	2Mpa	150°	3	43	42.96
Ub2 Dd4	2Mpa	150°	3	44	42.75
Ub2 Dd4	2Mpa	150°	3	45	46.27
Ub2 Dd4	2Mpa	150°	3	46	245.14
Ub2 Dd4	2Mpa	150°	3	47	122.38
Ub2 Dd4	2Mpa	150°	3	48	127.1
Ub2 Dd4	2Mpa	150°	3	49	118.77
Ub2 Dd4	2Mpa	150°	3	50	100.7
Ub2 Dd4	2Mpa	150°	3	51	186.35
Ub2 Dd4	2Mpa	150°	3	52	180.93
Ub2 Dd4	2Mpa	150°	3	53	204.89
Ub2 Dd4	2Mpa	150°	3	54	238.41
Ub2 Dd4	2Mpa	150°	3	55	156.53
Ub2 Dd4	2Mpa	150°	3	56	116.56
Ub2 Dd4	2Mpa	150°	3	57	116.85
Ub2 Dd4	2Mpa	150°	3	58	147.58
Ub2 Dd4	2Mpa	150°	3	59	161.3
Ub2 Dd4	2Mpa	150°	3	60	199.03
Uc2 Da4	2Mpa	150°	3	1	168.16
Uc2 Da4	2Mpa	150°	3	2	146.44
Uc2 Da4	2Mpa	150°	3	3	170.27
Uc2 Da4	2Mpa	150°	3	4	179.14
Uc2 Da4	2Mpa	150°	3	5	157.84
Uc2 Da4	2Mpa	150°	3	6	212.31
Uc2 Da4	2Mpa	150°	3	7	146.09
Uc2 Da4	2Mpa	150°	3	8	155.19
Uc2 Da4	2Mpa	150°	3	9	193.52
Uc2 Da4	2Mpa	150°	3	10	164.6
Uc2 Da4	2Mpa	150°	3	11	228
Uc2 Da4	2Mpa	150°	3	12	202.91
Uc2 Da4	2Mpa	150°	3	13	197.45
Uc2 Da4	2Mpa	150°	3	14	205.54
Uc2 Da4	2Mpa	150°	3	15	140.14
Uc2 Da4	2Mpa	150°	3	16	2.12
Uc2 Da4	2Mpa	150°	3	17	4.23
Uc2 Da4	2Mpa	150°	3	18	4.74
Uc2 Da4	2Mpa	150°	3	19	4.23
Uc2 Da4	2Mpa	150°	3	20	2.12
Uc2 Da4	2Mpa	150°	3	21	4.74
Uc2 Da4	2Mpa	150°	3	22	2.12
Uc2 Da4	2Mpa	150°	3	23	6.7
Uc2 Da4	2Mpa	150°	3	24	6.7
Uc2 Da4	2Mpa	150°	3	25	4.24
Uc2 Da4	2Mpa	150°	3	26	4.24
Uc2 Da4	2Mpa	150°	3	27	10.81
Uc2 Da4	2Mpa	150°	3	28	4.24
Uc2 Da4	2Mpa	150°	3	29	4.74
Uc2 Da4	2Mpa	150°	3	30	2.12
Uc2 Da4	2Mpa	150°	3	31	53.15
Uc2 Da4	2Mpa	150°	3	32	48.93
Uc2 Da4	2Mpa	150°	3	33	43.69
Uc2 Da4	2Mpa	150°	3	34	35.52
Uc2 Da4	2Mpa	150°	3	35	68.47
Uc2 Da4	2Mpa	150°	3	36	39.08
Uc2 Da4	2Mpa	150°	3	37	37.55
Uc2 Da4	2Mpa	150°	3	38	56.11
Uc2 Da4	2Mpa	150°	3	39	40.21
Uc2 Da4	2Mpa	150°	3	40	57.83
Uc2 Da4	2Mpa	150°	3	41	41.64
Uc2 Da4	2Mpa	150°	3	42	45.75
Uc2 Da4	2Mpa	150°	3	43	30.34
Uc2 Da4	2Mpa	150°	3	44	35.52
Uc2 Da4	2Mpa	150°	3	45	36.21
Uc2 Da4	2Mpa	150°	3	46	160.53
Uc2 Da4	2Mpa	150°	3	47	230.81
Uc2 Da4	2Mpa	150°	3	48	128.01
Uc2 Da4	2Mpa	150°	3	49	233.04
Uc2 Da4	2Mpa	150°	3	50	265.55
Uc2 Da4	2Mpa	150°	3	51	194.63
Uc2 Da4	2Mpa	150°	3	52	185.21
Uc2 Da4	2Mpa	150°	3	53	180.76
Uc2 Da4	2Mpa	150°	3	54	205.23
Uc2 Da4	2Mpa	150°	3	55	192.68
Uc2 Da4	2Mpa	150°	3	56	175.91
Uc2 Da4	2Mpa	150°	3	57	140.51
Uc2 Da4	2Mpa	150°	3	58	146.99
Uc2 Da4	2Mpa	150°	3	59	159.46
Uc2 Da4	2Mpa	150°	3	60	175.96
Ub2 Dd4	2Mpa	150°	4	1	135.8
Ub2 Dd4	2Mpa	150°	4	2	265.79
Ub2 Dd4	2Mpa	150°	4	3	253.32
Ub2 Dd4	2Mpa	150°	4	4	189.02
Ub2 Dd4	2Mpa	150°	4	5	132.97
Ub2 Dd4	2Mpa	150°	4	6	137
Ub2 Dd4	2Mpa	150°	4	7	187.96
Ub2 Dd4	2Mpa	150°	4	8	141.53
Ub2 Dd4	2Mpa	150°	4	9	165.77
Ub2 Dd4	2Mpa	150°	4	10	261.06
Ub2 Dd4	2Mpa	150°	4	11	227.45
Ub2 Dd4	2Mpa	150°	4	12	235.01
Ub2 Dd4	2Mpa	150°	4	13	253.74
Ub2 Dd4	2Mpa	150°	4	14	161.53
Ub2 Dd4	2Mpa	150°	4	15	141.62
Ub2 Dd4	2Mpa	150°	4	16	2.5
Ub2 Dd4	2Mpa	150°	4	17	9.02
Ub2 Dd4	2Mpa	150°	4	18	9.02
Ub2 Dd4	2Mpa	150°	4	19	9.02
Ub2 Dd4	2Mpa	150°	4	20	5.59
Ub2 Dd4	2Mpa	150°	4	21	7.91
Ub2 Dd4	2Mpa	150°	4	22	11.18
Ub2 Dd4	2Mpa	150°	4	23	7.91
Ub2 Dd4	2Mpa	150°	4	24	13.47
Ub2 Dd4	2Mpa	150°	4	25	5.59
Ub2 Dd4	2Mpa	150°	4	26	2.5
Ub2 Dd4	2Mpa	150°	4	27	5.59
Ub2 Dd4	2Mpa	150°	4	28	10
Ub2 Dd4	2Mpa	150°	4	29	5
Ub2 Dd4	2Mpa	150°	4	30	2.53
Ub2 Dd4	2Mpa	150°	4	31	45.53
Ub2 Dd4	2Mpa	150°	4	32	40.49
Ub2 Dd4	2Mpa	150°	4	33	37.88
Ub2 Dd4	2Mpa	150°	4	34	38.22
Ub2 Dd4	2Mpa	150°	4	35	50.51
Ub2 Dd4	2Mpa	150°	4	36	32.93
Ub2 Dd4	2Mpa	150°	4	37	48.09
Ub2 Dd4	2Mpa	150°	4	38	45.74
Ub2 Dd4	2Mpa	150°	4	39	38.22
Ub2 Dd4	2Mpa	150°	4	40	45.74
Ub2 Dd4	2Mpa	150°	4	41	38.22
Ub2 Dd4	2Mpa	150°	4	42	44.11
Ub2 Dd4	2Mpa	150°	4	43	41.85
Ub2 Dd4	2Mpa	150°	4	44	35.72
Ub2 Dd4	2Mpa	150°	4	45	58.09
Ub2 Dd4	2Mpa	150°	4	46	168.33
Ub2 Dd4	2Mpa	150°	4	47	117
Ub2 Dd4	2Mpa	150°	4	48	157.9
Ub2 Dd4	2Mpa	150°	4	49	133.27
Ub2 Dd4	2Mpa	150°	4	50	186.47
Ub2 Dd4	2Mpa	150°	4	51	207.22
Ub2 Dd4	2Mpa	150°	4	52	170.44
Ub2 Dd4	2Mpa	150°	4	53	212.7
Ub2 Dd4	2Mpa	150°	4	54	155.73
Ub2 Dd4	2Mpa	150°	4	55	86.91
Ub2 Dd4	2Mpa	150°	4	56	100.41
Ub2 Dd4	2Mpa	150°	4	57	123.54
Ub2 Dd4	2Mpa	150°	4	58	141.48
Ub2 Dd4	2Mpa	150°	4	59	118.27
Ub2 Dd4	2Mpa	150°	4	60	189.67
Uc2 Da4	2Mpa	150°	4	1	183.06
Uc2 Da4	2Mpa	150°	4	2	228.77
Uc2 Da4	2Mpa	150°	4	3	174.63
Uc2 Da4	2Mpa	150°	4	4	216.36
Uc2 Da4	2Mpa	150°	4	5	220.57
Uc2 Da4	2Mpa	150°	4	6	180.7
Uc2 Da4	2Mpa	150°	4	7	159.28
Uc2 Da4	2Mpa	150°	4	8	114.46
Uc2 Da4	2Mpa	150°	4	9	231.72
Uc2 Da4	2Mpa	150°	4	10	203.42
Uc2 Da4	2Mpa	150°	4	11	117.36
Uc2 Da4	2Mpa	150°	4	12	97.16
Uc2 Da4	2Mpa	150°	4	13	77.87
Uc2 Da4	2Mpa	150°	4	14	250.93
Uc2 Da4	2Mpa	150°	4	15	121.17
Uc2 Da4	2Mpa	150°	4	16	4.1
Uc2 Da4	2Mpa	150°	4	17	4.59
Uc2 Da4	2Mpa	150°	4	18	2.05
Uc2 Da4	2Mpa	150°	4	19	4.1
Uc2 Da4	2Mpa	150°	4	20	10.25
Uc2 Da4	2Mpa	150°	4	21	4.1
Uc2 Da4	2Mpa	150°	4	22	4.59
Uc2 Da4	2Mpa	150°	4	23	2.05
Uc2 Da4	2Mpa	150°	4	24	2.05
Uc2 Da4	2Mpa	150°	4	25	2.05
Uc2 Da4	2Mpa	150°	4	26	2.05
Uc2 Da4	2Mpa	150°	4	27	2.9
Uc2 Da4	2Mpa	150°	4	28	2.05
Uc2 Da4	2Mpa	150°	4	29	9.17
Uc2 Da4	2Mpa	150°	4	30	4.1
Uc2 Da4	2Mpa	150°	4	31	55.22
Uc2 Da4	2Mpa	150°	4	32	46.86
Uc2 Da4	2Mpa	150°	4	33	49.61
Uc2 Da4	2Mpa	150°	4	34	38.7
Uc2 Da4	2Mpa	150°	4	35	38.91
Uc2 Da4	2Mpa	150°	4	36	45.86
Uc2 Da4	2Mpa	150°	4	37	34.14
Uc2 Da4	2Mpa	150°	4	38	48.62
Uc2 Da4	2Mpa	150°	4	39	38.7
Uc2 Da4	2Mpa	150°	4	40	42.68
Uc2 Da4	2Mpa	150°	4	41	44.37
Uc2 Da4	2Mpa	150°	4	42	37.65
Uc2 Da4	2Mpa	150°	4	43	45.86
Uc2 Da4	2Mpa	150°	4	44	38.15
Uc2 Da4	2Mpa	150°	4	45	59.8
Uc2 Da4	2Mpa	150°	4	46	220.9
Uc2 Da4	2Mpa	150°	4	47	171.32
Uc2 Da4	2Mpa	150°	4	48	223.75
Uc2 Da4	2Mpa	150°	4	49	181.77
Uc2 Da4	2Mpa	150°	4	50	117.53
Uc2 Da4	2Mpa	150°	4	51	179.86
Uc2 Da4	2Mpa	150°	4	52	200.14
Uc2 Da4	2Mpa	150°	4	53	239.5
Uc2 Da4	2Mpa	150°	4	54	195.63
Uc2 Da4	2Mpa	150°	4	55	210.9
Uc2 Da4	2Mpa	150°	4	56	108.84
Uc2 Da4	2Mpa	150°	4	57	108.3
Uc2 Da4	2Mpa	150°	4	58	84.36
Uc2 Da4	2Mpa	150°	4	59	179.51
Uc2 Da4	2Mpa	150°	4	60	113.34
Ub2 Dd4	2Mpa	150°	5	1	172.22
Ub2 Dd4	2Mpa	150°	5	2	251.4
Ub2 Dd4	2Mpa	150°	5	3	206.57
Ub2 Dd4	2Mpa	150°	5	4	163.91
Ub2 Dd4	2Mpa	150°	5	5	194.53
Ub2 Dd4	2Mpa	150°	5	6	104.49
Ub2 Dd4	2Mpa	150°	5	7	200.24
Ub2 Dd4	2Mpa	150°	5	8	236.26
Ub2 Dd4	2Mpa	150°	5	9	192.48
Ub2 Dd4	2Mpa	150°	5	10	150.42
Ub2 Dd4	2Mpa	150°	5	11	139.75
Ub2 Dd4	2Mpa	150°	5	12	106.42
Ub2 Dd4	2Mpa	150°	5	13	185.96
Ub2 Dd4	2Mpa	150°	5	14	261.02
Ub2 Dd4	2Mpa	150°	5	15	184.39
Ub2 Dd4	2Mpa	150°	5	16	6.26
Ub2 Dd4	2Mpa	150°	5	17	9.39
Ub2 Dd4	2Mpa	150°	5	18	6.26
Ub2 Dd4	2Mpa	150°	5	19	8.84
Ub2 Dd4	2Mpa	150°	5	20	3.13
Ub2 Dd4	2Mpa	150°	5	21	3.13
Ub2 Dd4	2Mpa	150°	5	22	3.13
Ub2 Dd4	2Mpa	150°	5	23	9.89
Ub2 Dd4	2Mpa	150°	5	24	3.13
Ub2 Dd4	2Mpa	150°	5	25	8.84
Ub2 Dd4	2Mpa	150°	5	26	4.42
Ub2 Dd4	2Mpa	150°	5	27	6.26
Ub2 Dd4	2Mpa	150°	5	28	8.84
Ub2 Dd4	2Mpa	150°	5	29	4.42
Ub2 Dd4	2Mpa	150°	5	30	6.26
Ub2 Dd4	2Mpa	150°	5	31	69.66
Ub2 Dd4	2Mpa	150°	5	32	61.97
Ub2 Dd4	2Mpa	150°	5	33	60.13
Ub2 Dd4	2Mpa	150°	5	34	61.9
Ub2 Dd4	2Mpa	150°	5	35	39.82
Ub2 Dd4	2Mpa	150°	5	36	65.92
Ub2 Dd4	2Mpa	150°	5	37	38.32
Ub2 Dd4	2Mpa	150°	5	38	60.88
Ub2 Dd4	2Mpa	150°	5	39	48.84
Ub2 Dd4	2Mpa	150°	5	40	41.37
Ub2 Dd4	2Mpa	150°	5	41	44.31
Ub2 Dd4	2Mpa	150°	5	42	38.77
Ub2 Dd4	2Mpa	150°	5	43	39.33
Ub2 Dd4	2Mpa	150°	5	44	52.11
Ub2 Dd4	2Mpa	150°	5	45	35.49
Ub2 Dd4	2Mpa	150°	5	46	213.15
Ub2 Dd4	2Mpa	150°	5	47	188.44
Ub2 Dd4	2Mpa	150°	5	48	200.37
Ub2 Dd4	2Mpa	150°	5	49	252.23
Ub2 Dd4	2Mpa	150°	5	50	198.24
Ub2 Dd4	2Mpa	150°	5	51	224.9
Ub2 Dd4	2Mpa	150°	5	52	167.88
Ub2 Dd4	2Mpa	150°	5	53	181.01
Ub2 Dd4	2Mpa	150°	5	54	132.53
Ub2 Dd4	2Mpa	150°	5	55	121.42
Ub2 Dd4	2Mpa	150°	5	56	178.44
Ub2 Dd4	2Mpa	150°	5	57	246.21
Ub2 Dd4	2Mpa	150°	5	58	151.3
Ub2 Dd4	2Mpa	150°	5	59	175.34
Ub2 Dd4	2Mpa	150°	5	60	128.22
Uc2 Da4	2Mpa	150°	5	1	169.22
Uc2 Da4	2Mpa	150°	5	2	153.01
Uc2 Da4	2Mpa	150°	5	3	244.21
Uc2 Da4	2Mpa	150°	5	4	151.35
Uc2 Da4	2Mpa	150°	5	5	272.26
Uc2 Da4	2Mpa	150°	5	6	220.76
Uc2 Da4	2Mpa	150°	5	7	137.06
Uc2 Da4	2Mpa	150°	5	8	170.67
Uc2 Da4	2Mpa	150°	5	9	205.24
Uc2 Da4	2Mpa	150°	5	10	152.11
Uc2 Da4	2Mpa	150°	5	11	163.51
Uc2 Da4	2Mpa	150°	5	12	148.01
Uc2 Da4	2Mpa	150°	5	13	158.12
Uc2 Da4	2Mpa	150°	5	14	136.98
Uc2 Da4	2Mpa	150°	5	15	215.98
Uc2 Da4	2Mpa	150°	5	16	7.07
Uc2 Da4	2Mpa	150°	5	17	14.58
Uc2 Da4	2Mpa	150°	5	18	7.07
Uc2 Da4	2Mpa	150°	5	19	7.07
Uc2 Da4	2Mpa	150°	5	20	5.59
Uc2 Da4	2Mpa	150°	5	21	5
Uc2 Da4	2Mpa	150°	5	22	5
Uc2 Da4	2Mpa	150°	5	23	12.5
Uc2 Da4	2Mpa	150°	5	24	3.54
Uc2 Da4	2Mpa	150°	5	25	2.5
Uc2 Da4	2Mpa	150°	5	26	2.5
Uc2 Da4	2Mpa	150°	5	27	15.81
Uc2 Da4	2Mpa	150°	5	28	5
Uc2 Da4	2Mpa	150°	5	29	7.07
Uc2 Da4	2Mpa	150°	5	30	3.54
Uc2 Da4	2Mpa	150°	5	31	56.07
Uc2 Da4	2Mpa	150°	5	32	53.37
Uc2 Da4	2Mpa	150°	5	33	44.3
Uc2 Da4	2Mpa	150°	5	34	41.67
Uc2 Da4	2Mpa	150°	5	35	53.13
Uc2 Da4	2Mpa	150°	5	36	43.36
Uc2 Da4	2Mpa	150°	5	37	42.2
Uc2 Da4	2Mpa	150°	5	38	38.31
Uc2 Da4	2Mpa	150°	5	39	36.87
Uc2 Da4	2Mpa	150°	5	40	30.77
Uc2 Da4	2Mpa	150°	5	41	36.87
Uc2 Da4	2Mpa	150°	5	42	48.65
Uc2 Da4	2Mpa	150°	5	43	41.26
Uc2 Da4	2Mpa	150°	5	44	56.07
Uc2 Da4	2Mpa	150°	5	45	49.71
Uc2 Da4	2Mpa	150°	5	46	154.48
Uc2 Da4	2Mpa	150°	5	47	159.16
Uc2 Da4	2Mpa	150°	5	48	186.79
Uc2 Da4	2Mpa	150°	5	49	151.18
Uc2 Da4	2Mpa	150°	5	50	140.05
Uc2 Da4	2Mpa	150°	5	51	124.89
Uc2 Da4	2Mpa	150°	5	52	110
Uc2 Da4	2Mpa	150°	5	53	97.95
Uc2 Da4	2Mpa	150°	5	54	107.6
Uc2 Da4	2Mpa	150°	5	55	142.94
Uc2 Da4	2Mpa	150°	5	56	161.46
Uc2 Da4	2Mpa	150°	5	57	124.34
Uc2 Da4	2Mpa	150°	5	58	106.28
Uc2 Da4	2Mpa	150°	5	59	134.65
Uc2 Da4	2Mpa	150°	5	60	85.02
Ua3 Dc2	2Mpa	190°	1	1	230.28
Ua3 Dc2	2Mpa	190°	1	2	199.47
Ua3 Dc2	2Mpa	190°	1	3	205.11
Ua3 Dc2	2Mpa	190°	1	4	155.14
Ua3 Dc2	2Mpa	190°	1	5	162.98
Ua3 Dc2	2Mpa	190°	1	6	228.38
Ua3 Dc2	2Mpa	190°	1	7	111.83
Ua3 Dc2	2Mpa	190°	1	8	150.6
Ua3 Dc2	2Mpa	190°	1	9	225.43
Ua3 Dc2	2Mpa	190°	1	10	245.37
Ua3 Dc2	2Mpa	190°	1	11	277.62
Ua3 Dc2	2Mpa	190°	1	12	166.44
Ua3 Dc2	2Mpa	190°	1	13	181
Ua3 Dc2	2Mpa	190°	1	14	160.51
Ua3 Dc2	2Mpa	190°	1	15	164.36
Ua3 Dc2	2Mpa	190°	1	16	3.49
Ua3 Dc2	2Mpa	190°	1	17	12.59
Ua3 Dc2	2Mpa	190°	1	18	5.52
Ua3 Dc2	2Mpa	190°	1	19	4.94
Ua3 Dc2	2Mpa	190°	1	20	2.47
Ua3 Dc2	2Mpa	190°	1	21	2.47
Ua3 Dc2	2Mpa	190°	1	22	3.49
Ua3 Dc2	2Mpa	190°	1	23	7.81
Ua3 Dc2	2Mpa	190°	1	24	7.81
Ua3 Dc2	2Mpa	190°	1	25	5.52
Ua3 Dc2	2Mpa	190°	1	26	4.94
Ua3 Dc2	2Mpa	190°	1	27	7.82
Ua3 Dc2	2Mpa	190°	1	28	5.52
Ua3 Dc2	2Mpa	190°	1	29	11.05
Ua3 Dc2	2Mpa	190°	1	30	4.94
Ua3 Dc2	2Mpa	190°	1	31	54.16
Ua3 Dc2	2Mpa	190°	1	32	50
Ua3 Dc2	2Mpa	190°	1	33	46.4
Ua3 Dc2	2Mpa	190°	1	34	43.21
Ua3 Dc2	2Mpa	190°	1	35	61.9
Ua3 Dc2	2Mpa	190°	1	36	53.03
Ua3 Dc2	2Mpa	190°	1	37	50.86
Ua3 Dc2	2Mpa	190°	1	38	53.44
Ua3 Dc2	2Mpa	190°	1	39	48.65
Ua3 Dc2	2Mpa	190°	1	40	83.02
Ua3 Dc2	2Mpa	190°	1	41	55.5
Ua3 Dc2	2Mpa	190°	1	42	72.63
Ua3 Dc2	2Mpa	190°	1	43	47.7
Ua3 Dc2	2Mpa	190°	1	44	45.34
Ua3 Dc2	2Mpa	190°	1	45	55.51
Ua3 Dc2	2Mpa	190°	1	46	240.61
Ua3 Dc2	2Mpa	190°	1	47	260.02
Ua3 Dc2	2Mpa	190°	1	48	146.02
Ua3 Dc2	2Mpa	190°	1	49	246.34
Ua3 Dc2	2Mpa	190°	1	50	160.87
Ua3 Dc2	2Mpa	190°	1	51	202.71
Ua3 Dc2	2Mpa	190°	1	52	172.85
Ua3 Dc2	2Mpa	190°	1	53	158.11
Ua3 Dc2	2Mpa	190°	1	54	160.8
Ua3 Dc2	2Mpa	190°	1	55	143.93
Ua3 Dc2	2Mpa	190°	1	56	205.11
Ua3 Dc2	2Mpa	190°	1	57	144.56
Ua3 Dc2	2Mpa	190°	1	58	160.72
Ua3 Dc2	2Mpa	190°	1	59	147.2
Ua3 Dc2	2Mpa	190°	1	60	124.66
Ub4 Dd3	2Mpa	190°	1	1	179.07
Ub4 Dd3	2Mpa	190°	1	2	138.85
Ub4 Dd3	2Mpa	190°	1	3	240.99
Ub4 Dd3	2Mpa	190°	1	4	272.95
Ub4 Dd3	2Mpa	190°	1	5	269.56
Ub4 Dd3	2Mpa	190°	1	6	234.58
Ub4 Dd3	2Mpa	190°	1	7	173.31
Ub4 Dd3	2Mpa	190°	1	8	221.56
Ub4 Dd3	2Mpa	190°	1	9	248.12
Ub4 Dd3	2Mpa	190°	1	10	269.12
Ub4 Dd3	2Mpa	190°	1	11	88.82
Ub4 Dd3	2Mpa	190°	1	12	124.74
Ub4 Dd3	2Mpa	190°	1	13	126.19
Ub4 Dd3	2Mpa	190°	1	14	122.5
Ub4 Dd3	2Mpa	190°	1	15	131.49
Ub4 Dd3	2Mpa	190°	1	16	3.08
Ub4 Dd3	2Mpa	190°	1	17	3.08
Ub4 Dd3	2Mpa	190°	1	18	6.15
Ub4 Dd3	2Mpa	190°	1	19	9.23
Ub4 Dd3	2Mpa	190°	1	20	4.35
Ub4 Dd3	2Mpa	190°	1	21	3.08
Ub4 Dd3	2Mpa	190°	1	22	6.15
Ub4 Dd3	2Mpa	190°	1	23	8.71
Ub4 Dd3	2Mpa	190°	1	24	9.23
Ub4 Dd3	2Mpa	190°	1	25	6.88
Ub4 Dd3	2Mpa	190°	1	26	6.15
Ub4 Dd3	2Mpa	190°	1	27	6.15
Ub4 Dd3	2Mpa	190°	1	28	3.08
Ub4 Dd3	2Mpa	190°	1	29	6.15
Ub4 Dd3	2Mpa	190°	1	30	3.08
Ub4 Dd3	2Mpa	190°	1	31	87.03
Ub4 Dd3	2Mpa	190°	1	32	57.49
Ub4 Dd3	2Mpa	190°	1	33	50.09
Ub4 Dd3	2Mpa	190°	1	34	55.73
Ub4 Dd3	2Mpa	190°	1	35	63.44
Ub4 Dd3	2Mpa	190°	1	36	65.78
Ub4 Dd3	2Mpa	190°	1	37	60.46
Ub4 Dd3	2Mpa	190°	1	38	44.06
Ub4 Dd3	2Mpa	190°	1	39	65.27
Ub4 Dd3	2Mpa	190°	1	40	67.21
Ub4 Dd3	2Mpa	190°	1	41	67.21
Ub4 Dd3	2Mpa	190°	1	42	84.49
Ub4 Dd3	2Mpa	190°	1	43	55.73
Ub4 Dd3	2Mpa	190°	1	44	82.11
Ub4 Dd3	2Mpa	190°	1	45	59.19
Ub4 Dd3	2Mpa	190°	1	46	144.62
Ub4 Dd3	2Mpa	190°	1	47	281.37
Ub4 Dd3	2Mpa	190°	1	48	258.24
Ub4 Dd3	2Mpa	190°	1	49	301.48
Ub4 Dd3	2Mpa	190°	1	50	222.35
Ub4 Dd3	2Mpa	190°	1	51	178.57
Ub4 Dd3	2Mpa	190°	1	52	136.7
Ub4 Dd3	2Mpa	190°	1	53	115.34
Ub4 Dd3	2Mpa	190°	1	54	108.77
Ub4 Dd3	2Mpa	190°	1	55	172.78
Ub4 Dd3	2Mpa	190°	1	56	146.28
Ub4 Dd3	2Mpa	190°	1	57	241.37
Ub4 Dd3	2Mpa	190°	1	58	157.2
Ub4 Dd3	2Mpa	190°	1	59	104.2
Ub4 Dd3	2Mpa	190°	1	60	114.88
Ua3 Dc2	2Mpa	190°	2	1	147.33
Ua3 Dc2	2Mpa	190°	2	2	131.32
Ua3 Dc2	2Mpa	190°	2	3	138.35
Ua3 Dc2	2Mpa	190°	2	4	252.73
Ua3 Dc2	2Mpa	190°	2	5	171.14
Ua3 Dc2	2Mpa	190°	2	6	218.66
Ua3 Dc2	2Mpa	190°	2	7	199.74
Ua3 Dc2	2Mpa	190°	2	8	113.21
Ua3 Dc2	2Mpa	190°	2	9	93.9
Ua3 Dc2	2Mpa	190°	2	10	182.13
Ua3 Dc2	2Mpa	190°	2	11	218.46
Ua3 Dc2	2Mpa	190°	2	12	115.52
Ua3 Dc2	2Mpa	190°	2	13	109.86
Ua3 Dc2	2Mpa	190°	2	14	102.92
Ua3 Dc2	2Mpa	190°	2	15	84.88
Ua3 Dc2	2Mpa	190°	2	16	2.06
Ua3 Dc2	2Mpa	190°	2	17	2.06
Ua3 Dc2	2Mpa	190°	2	18	2.91
Ua3 Dc2	2Mpa	190°	2	19	4.6
Ua3 Dc2	2Mpa	190°	2	20	8.23
Ua3 Dc2	2Mpa	190°	2	21	2.06
Ua3 Dc2	2Mpa	190°	2	22	4.6
Ua3 Dc2	2Mpa	190°	2	23	4.6
Ua3 Dc2	2Mpa	190°	2	24	4.6
Ua3 Dc2	2Mpa	190°	2	25	2.06
Ua3 Dc2	2Mpa	190°	2	26	2.91
Ua3 Dc2	2Mpa	190°	2	27	2.06
Ua3 Dc2	2Mpa	190°	2	28	6.17
Ua3 Dc2	2Mpa	190°	2	29	5.82
Ua3 Dc2	2Mpa	190°	2	30	4.12
Ua3 Dc2	2Mpa	190°	2	31	50.63
Ua3 Dc2	2Mpa	190°	2	32	49.1
Ua3 Dc2	2Mpa	190°	2	33	45.15
Ua3 Dc2	2Mpa	190°	2	34	46.26
Ua3 Dc2	2Mpa	190°	2	35	42.98
Ua3 Dc2	2Mpa	190°	2	36	47.88
Ua3 Dc2	2Mpa	190°	2	37	46.99
Ua3 Dc2	2Mpa	190°	2	38	59.84
Ua3 Dc2	2Mpa	190°	2	39	69.2
Ua3 Dc2	2Mpa	190°	2	40	44.2
Ua3 Dc2	2Mpa	190°	2	41	41.43
Ua3 Dc2	2Mpa	190°	2	42	32.55
Ua3 Dc2	2Mpa	190°	2	43	35.95
Ua3 Dc2	2Mpa	190°	2	44	58.12
Ua3 Dc2	2Mpa	190°	2	45	49.79
Ua3 Dc2	2Mpa	190°	2	46	114.84
Ua3 Dc2	2Mpa	190°	2	47	170.81
Ua3 Dc2	2Mpa	190°	2	48	126.24
Ua3 Dc2	2Mpa	190°	2	49	130.74
Ua3 Dc2	2Mpa	190°	2	50	174.57
Ua3 Dc2	2Mpa	190°	2	51	202.21
Ua3 Dc2	2Mpa	190°	2	52	175.33
Ua3 Dc2	2Mpa	190°	2	53	177.01
Ua3 Dc2	2Mpa	190°	2	54	108.6
Ua3 Dc2	2Mpa	190°	2	55	117.8
Ua3 Dc2	2Mpa	190°	2	56	137.08
Ua3 Dc2	2Mpa	190°	2	57	141.21
Ua3 Dc2	2Mpa	190°	2	58	98.84
Ua3 Dc2	2Mpa	190°	2	59	162.19
Ua3 Dc2	2Mpa	190°	2	60	162.11
Ub4 Dd3	2Mpa	190°	2	1	327.15
Ub4 Dd3	2Mpa	190°	2	2	235.39
Ub4 Dd3	2Mpa	190°	2	3	202.79
Ub4 Dd3	2Mpa	190°	2	4	294.02
Ub4 Dd3	2Mpa	190°	2	5	158.53
Ub4 Dd3	2Mpa	190°	2	6	177.4
Ub4 Dd3	2Mpa	190°	2	7	135.71
Ub4 Dd3	2Mpa	190°	2	8	146.28
Ub4 Dd3	2Mpa	190°	2	9	171.25
Ub4 Dd3	2Mpa	190°	2	10	171.43
Ub4 Dd3	2Mpa	190°	2	11	214.84
Ub4 Dd3	2Mpa	190°	2	12	172.8
Ub4 Dd3	2Mpa	190°	2	13	224.67
Ub4 Dd3	2Mpa	190°	2	14	137.16
Ub4 Dd3	2Mpa	190°	2	15	169.56
Ub4 Dd3	2Mpa	190°	2	16	7.78
Ub4 Dd3	2Mpa	190°	2	17	4.92
Ub4 Dd3	2Mpa	190°	2	18	7.38
Ub4 Dd3	2Mpa	190°	2	19	4.92
Ub4 Dd3	2Mpa	190°	2	20	4.92
Ub4 Dd3	2Mpa	190°	2	21	7.78
Ub4 Dd3	2Mpa	190°	2	22	7.78
Ub4 Dd3	2Mpa	190°	2	23	2.46
Ub4 Dd3	2Mpa	190°	2	24	5.5
Ub4 Dd3	2Mpa	190°	2	25	8.88
Ub4 Dd3	2Mpa	190°	2	26	2.46
Ub4 Dd3	2Mpa	190°	2	27	5.5
Ub4 Dd3	2Mpa	190°	2	28	6.96
Ub4 Dd3	2Mpa	190°	2	29	2.46
Ub4 Dd3	2Mpa	190°	2	30	2.46
Ub4 Dd3	2Mpa	190°	2	31	50.2
Ub4 Dd3	2Mpa	190°	2	32	48.35
Ub4 Dd3	2Mpa	190°	2	33	55.53
Ub4 Dd3	2Mpa	190°	2	34	49.77
Ub4 Dd3	2Mpa	190°	2	35	42.13
Ub4 Dd3	2Mpa	190°	2	36	28.78
Ub4 Dd3	2Mpa	190°	2	37	43.26
Ub4 Dd3	2Mpa	190°	2	38	49.38
Ub4 Dd3	2Mpa	190°	2	39	60.35
Ub4 Dd3	2Mpa	190°	2	40	45.85
Ub4 Dd3	2Mpa	190°	2	41	43.11
Ub4 Dd3	2Mpa	190°	2	42	58.33
Ub4 Dd3	2Mpa	190°	2	43	39.82
Ub4 Dd3	2Mpa	190°	2	44	45.39
Ub4 Dd3	2Mpa	190°	2	45	48.74
Ub4 Dd3	2Mpa	190°	2	46	236.42
Ub4 Dd3	2Mpa	190°	2	47	213.18
Ub4 Dd3	2Mpa	190°	2	48	152.64
Ub4 Dd3	2Mpa	190°	2	49	117.84
Ub4 Dd3	2Mpa	190°	2	50	127.83
Ub4 Dd3	2Mpa	190°	2	51	188.83
Ub4 Dd3	2Mpa	190°	2	52	255.84
Ub4 Dd3	2Mpa	190°	2	53	260.63
Ub4 Dd3	2Mpa	190°	2	54	226.96
Ub4 Dd3	2Mpa	190°	2	55	193.45
Ub4 Dd3	2Mpa	190°	2	56	134.17
Ub4 Dd3	2Mpa	190°	2	57	175.85
Ub4 Dd3	2Mpa	190°	2	58	171.6
Ub4 Dd3	2Mpa	190°	2	59	126.62
Ub4 Dd3	2Mpa	190°	2	60	221.85
Ua3 Dc2	2Mpa	190°	3	1	148.6
Ua3 Dc2	2Mpa	190°	3	2	162.63
Ua3 Dc2	2Mpa	190°	3	3	190.15
Ua3 Dc2	2Mpa	190°	3	4	176.95
Ua3 Dc2	2Mpa	190°	3	5	214.41
Ua3 Dc2	2Mpa	190°	3	6	136.13
Ua3 Dc2	2Mpa	190°	3	7	188.1
Ua3 Dc2	2Mpa	190°	3	8	192.36
Ua3 Dc2	2Mpa	190°	3	9	141.03
Ua3 Dc2	2Mpa	190°	3	10	96.24
Ua3 Dc2	2Mpa	190°	3	11	225.14
Ua3 Dc2	2Mpa	190°	3	12	100
Ua3 Dc2	2Mpa	190°	3	13	119.11
Ua3 Dc2	2Mpa	190°	3	14	144.45
Ua3 Dc2	2Mpa	190°	3	15	99.27
Ua3 Dc2	2Mpa	190°	3	16	2.5
Ua3 Dc2	2Mpa	190°	3	17	5.59
Ua3 Dc2	2Mpa	190°	3	18	2.5
Ua3 Dc2	2Mpa	190°	3	19	2.5
Ua3 Dc2	2Mpa	190°	3	20	2.5
Ua3 Dc2	2Mpa	190°	3	21	2.5
Ua3 Dc2	2Mpa	190°	3	22	5
Ua3 Dc2	2Mpa	190°	3	23	5
Ua3 Dc2	2Mpa	190°	3	24	5.59
Ua3 Dc2	2Mpa	190°	3	25	2.5
Ua3 Dc2	2Mpa	190°	3	26	5.59
Ua3 Dc2	2Mpa	190°	3	27	3.54
Ua3 Dc2	2Mpa	190°	3	28	5.59
Ua3 Dc2	2Mpa	190°	3	29	7.07
Ua3 Dc2	2Mpa	190°	3	30	3.54
Ua3 Dc2	2Mpa	190°	3	31	40.31
Ua3 Dc2	2Mpa	190°	3	32	45.28
Ua3 Dc2	2Mpa	190°	3	33	48.54
Ua3 Dc2	2Mpa	190°	3	34	42.57
Ua3 Dc2	2Mpa	190°	3	35	45.28
Ua3 Dc2	2Mpa	190°	3	36	45.07
Ua3 Dc2	2Mpa	190°	3	37	48.09
Ua3 Dc2	2Mpa	190°	3	38	48.54
Ua3 Dc2	2Mpa	190°	3	39	45.07
Ua3 Dc2	2Mpa	190°	3	40	63.74
Ua3 Dc2	2Mpa	190°	3	41	58.53
Ua3 Dc2	2Mpa	190°	3	42	48.54
Ua3 Dc2	2Mpa	190°	3	43	42.57
Ua3 Dc2	2Mpa	190°	3	44	42.57
Ua3 Dc2	2Mpa	190°	3	45	42.79
Ua3 Dc2	2Mpa	190°	3	46	160.89
Ua3 Dc2	2Mpa	190°	3	47	132.9
Ua3 Dc2	2Mpa	190°	3	48	242.91
Ua3 Dc2	2Mpa	190°	3	49	117.54
Ua3 Dc2	2Mpa	190°	3	50	172.41
Ua3 Dc2	2Mpa	190°	3	51	135.9
Ua3 Dc2	2Mpa	190°	3	52	155.18
Ua3 Dc2	2Mpa	190°	3	53	157.88
Ua3 Dc2	2Mpa	190°	3	54	114.51
Ua3 Dc2	2Mpa	190°	3	55	141.13
Ua3 Dc2	2Mpa	190°	3	56	132.04
Ua3 Dc2	2Mpa	190°	3	57	227.02
Ua3 Dc2	2Mpa	190°	3	58	140.07
Ua3 Dc2	2Mpa	190°	3	59	130.04
Ua3 Dc2	2Mpa	190°	3	60	104.69
Ub4 Dd3	2Mpa	190°	3	1	190.78
Ub4 Dd3	2Mpa	190°	3	2	189.98
Ub4 Dd3	2Mpa	190°	3	3	193.52
Ub4 Dd3	2Mpa	190°	3	4	200.74
Ub4 Dd3	2Mpa	190°	3	5	196.4
Ub4 Dd3	2Mpa	190°	3	6	197.87
Ub4 Dd3	2Mpa	190°	3	7	132.59
Ub4 Dd3	2Mpa	190°	3	8	157.22
Ub4 Dd3	2Mpa	190°	3	9	223.41
Ub4 Dd3	2Mpa	190°	3	10	201.1
Ub4 Dd3	2Mpa	190°	3	11	122.39
Ub4 Dd3	2Mpa	190°	3	12	99.9
Ub4 Dd3	2Mpa	190°	3	13	129.54
Ub4 Dd3	2Mpa	190°	3	14	157.74
Ub4 Dd3	2Mpa	190°	3	15	110.5
Ub4 Dd3	2Mpa	190°	3	16	5.06
Ub4 Dd3	2Mpa	190°	3	17	7.59
Ub4 Dd3	2Mpa	190°	3	18	5.06
Ub4 Dd3	2Mpa	190°	3	19	5.66
Ub4 Dd3	2Mpa	190°	3	20	8.02
Ub4 Dd3	2Mpa	190°	3	21	5.06
Ub4 Dd3	2Mpa	190°	3	22	5.06
Ub4 Dd3	2Mpa	190°	3	23	2.53
Ub4 Dd3	2Mpa	190°	3	24	2.53
Ub4 Dd3	2Mpa	190°	3	25	5.66
Ub4 Dd3	2Mpa	190°	3	26	9.13
Ub4 Dd3	2Mpa	190°	3	27	5.66
Ub4 Dd3	2Mpa	190°	3	28	2.54
Ub4 Dd3	2Mpa	190°	3	29	3.58
Ub4 Dd3	2Mpa	190°	3	30	5.06
Ub4 Dd3	2Mpa	190°	3	31	44.23
Ub4 Dd3	2Mpa	190°	3	32	52.71
Ub4 Dd3	2Mpa	190°	3	33	49.95
Ub4 Dd3	2Mpa	190°	3	34	61.32
Ub4 Dd3	2Mpa	190°	3	35	53.24
Ub4 Dd3	2Mpa	190°	3	36	68.2
Ub4 Dd3	2Mpa	190°	3	37	63.51
Ub4 Dd3	2Mpa	190°	3	38	52.71
Ub4 Dd3	2Mpa	190°	3	39	48.71
Ub4 Dd3	2Mpa	190°	3	40	50.66
Ub4 Dd3	2Mpa	190°	3	41	56.63
Ub4 Dd3	2Mpa	190°	3	42	54.55
Ub4 Dd3	2Mpa	190°	3	43	47.58
Ub4 Dd3	2Mpa	190°	3	44	60.04
Ub4 Dd3	2Mpa	190°	3	45	57.86
Ub4 Dd3	2Mpa	190°	3	46	163.22
Ub4 Dd3	2Mpa	190°	3	47	147.35
Ub4 Dd3	2Mpa	190°	3	48	180.44
Ub4 Dd3	2Mpa	190°	3	49	196.55
Ub4 Dd3	2Mpa	190°	3	50	192.13
Ub4 Dd3	2Mpa	190°	3	51	123.61
Ub4 Dd3	2Mpa	190°	3	52	179.16
Ub4 Dd3	2Mpa	190°	3	53	167.38
Ub4 Dd3	2Mpa	190°	3	54	246.87
Ub4 Dd3	2Mpa	190°	3	55	160.35
Ub4 Dd3	2Mpa	190°	3	56	119.85
Ub4 Dd3	2Mpa	190°	3	57	183.66
Ub4 Dd3	2Mpa	190°	3	58	121.94
Ub4 Dd3	2Mpa	190°	3	59	161.5
Ub4 Dd3	2Mpa	190°	3	60	182.64
Ua3 Dc2	2Mpa	190°	4	1	224.12
Ua3 Dc2	2Mpa	190°	4	2	254.3
Ua3 Dc2	2Mpa	190°	4	3	203.75
Ua3 Dc2	2Mpa	190°	4	4	194.25
Ua3 Dc2	2Mpa	190°	4	5	182.49
Ua3 Dc2	2Mpa	190°	4	6	144.9
Ua3 Dc2	2Mpa	190°	4	7	71.1
Ua3 Dc2	2Mpa	190°	4	8	113.69
Ua3 Dc2	2Mpa	190°	4	9	199.33
Ua3 Dc2	2Mpa	190°	4	10	166.24
Ua3 Dc2	2Mpa	190°	4	11	151.59
Ua3 Dc2	2Mpa	190°	4	12	217.57
Ua3 Dc2	2Mpa	190°	4	13	159.66
Ua3 Dc2	2Mpa	190°	4	14	113.69
Ua3 Dc2	2Mpa	190°	4	15	214.53
Ua3 Dc2	2Mpa	190°	4	16	2.5
Ua3 Dc2	2Mpa	190°	4	17	7.89
Ua3 Dc2	2Mpa	190°	4	18	3.94
Ua3 Dc2	2Mpa	190°	4	19	1.76
Ua3 Dc2	2Mpa	190°	4	20	3.94
Ua3 Dc2	2Mpa	190°	4	21	2.5
Ua3 Dc2	2Mpa	190°	4	22	3.53
Ua3 Dc2	2Mpa	190°	4	23	3.94
Ua3 Dc2	2Mpa	190°	4	24	6.36
Ua3 Dc2	2Mpa	190°	4	25	4.99
Ua3 Dc2	2Mpa	190°	4	26	1.76
Ua3 Dc2	2Mpa	190°	4	27	1.76
Ua3 Dc2	2Mpa	190°	4	28	1.76
Ua3 Dc2	2Mpa	190°	4	29	3.53
Ua3 Dc2	2Mpa	190°	4	30	3.94
Ua3 Dc2	2Mpa	190°	4	31	48.16
Ua3 Dc2	2Mpa	190°	4	32	48.2
Ua3 Dc2	2Mpa	190°	4	33	53.67
Ua3 Dc2	2Mpa	190°	4	34	37.22
Ua3 Dc2	2Mpa	190°	4	35	49.44
Ua3 Dc2	2Mpa	190°	4	36	33.15
Ua3 Dc2	2Mpa	190°	4	37	45.78
Ua3 Dc2	2Mpa	190°	4	38	53.76
Ua3 Dc2	2Mpa	190°	4	39	46.89
Ua3 Dc2	2Mpa	190°	4	40	47.35
Ua3 Dc2	2Mpa	190°	4	41	44.26
Ua3 Dc2	2Mpa	190°	4	42	36.38
Ua3 Dc2	2Mpa	190°	4	43	58.05
Ua3 Dc2	2Mpa	190°	4	44	47.35
Ua3 Dc2	2Mpa	190°	4	45	36.38
Ua3 Dc2	2Mpa	190°	4	46	187.74
Ua3 Dc2	2Mpa	190°	4	47	128.85
Ua3 Dc2	2Mpa	190°	4	48	116.65
Ua3 Dc2	2Mpa	190°	4	49	114.91
Ua3 Dc2	2Mpa	190°	4	50	182.21
Ua3 Dc2	2Mpa	190°	4	51	229.33
Ua3 Dc2	2Mpa	190°	4	52	182.63
Ua3 Dc2	2Mpa	190°	4	53	167.79
Ua3 Dc2	2Mpa	190°	4	54	188.61
Ua3 Dc2	2Mpa	190°	4	55	129.21
Ua3 Dc2	2Mpa	190°	4	56	106.02
Ua3 Dc2	2Mpa	190°	4	57	166.84
Ua3 Dc2	2Mpa	190°	4	58	106.11
Ua3 Dc2	2Mpa	190°	4	59	114.45
Ua3 Dc2	2Mpa	190°	4	60	81.49
Ub4 Dd3	2Mpa	190°	4	1	308.31
Ub4 Dd3	2Mpa	190°	4	2	162.87
Ub4 Dd3	2Mpa	190°	4	3	310.72
Ub4 Dd3	2Mpa	190°	4	4	254.18
Ub4 Dd3	2Mpa	190°	4	5	264.93
Ub4 Dd3	2Mpa	190°	4	6	303.15
Ub4 Dd3	2Mpa	190°	4	7	215.97
Ub4 Dd3	2Mpa	190°	4	8	319.15
Ub4 Dd3	2Mpa	190°	4	9	163.81
Ub4 Dd3	2Mpa	190°	4	10	243.22
Ub4 Dd3	2Mpa	190°	4	11	243.27
Ub4 Dd3	2Mpa	190°	4	12	236.21
Ub4 Dd3	2Mpa	190°	4	13	196.93
Ub4 Dd3	2Mpa	190°	4	14	159.15
Ub4 Dd3	2Mpa	190°	4	15	152.3
Ub4 Dd3	2Mpa	190°	4	16	3.17
Ub4 Dd3	2Mpa	190°	4	17	9.52
Ub4 Dd3	2Mpa	190°	4	18	6.35
Ub4 Dd3	2Mpa	190°	4	19	6.35
Ub4 Dd3	2Mpa	190°	4	20	9.52
Ub4 Dd3	2Mpa	190°	4	21	13.48
Ub4 Dd3	2Mpa	190°	4	22	4.49
Ub4 Dd3	2Mpa	190°	4	23	7.1
Ub4 Dd3	2Mpa	190°	4	24	11.45
Ub4 Dd3	2Mpa	190°	4	25	7.1
Ub4 Dd3	2Mpa	190°	4	26	6.35
Ub4 Dd3	2Mpa	190°	4	27	9.52
Ub4 Dd3	2Mpa	190°	4	28	3.17
Ub4 Dd3	2Mpa	190°	4	29	6.35
Ub4 Dd3	2Mpa	190°	4	30	11.45
Ub4 Dd3	2Mpa	190°	4	31	54.8
Ub4 Dd3	2Mpa	190°	4	32	58.54
Ub4 Dd3	2Mpa	190°	4	33	80.94
Ub4 Dd3	2Mpa	190°	4	34	41.76
Ub4 Dd3	2Mpa	190°	4	35	50.89
Ub4 Dd3	2Mpa	190°	4	36	63.57
Ub4 Dd3	2Mpa	190°	4	37	55.45
Ub4 Dd3	2Mpa	190°	4	38	48.36
Ub4 Dd3	2Mpa	190°	4	39	65.45
Ub4 Dd3	2Mpa	190°	4	40	64.75
Ub4 Dd3	2Mpa	190°	4	41	50.89
Ub4 Dd3	2Mpa	190°	4	42	62.38
Ub4 Dd3	2Mpa	190°	4	43	58.54
Ub4 Dd3	2Mpa	190°	4	44	50.2
Ub4 Dd3	2Mpa	190°	4	45	53.22
Ub4 Dd3	2Mpa	190°	4	46	269.92
Ub4 Dd3	2Mpa	190°	4	47	193.87
Ub4 Dd3	2Mpa	190°	4	48	256.48
Ub4 Dd3	2Mpa	190°	4	49	165.23
Ub4 Dd3	2Mpa	190°	4	50	122.63
Ub4 Dd3	2Mpa	190°	4	51	254.38
Ub4 Dd3	2Mpa	190°	4	52	168.52
Ub4 Dd3	2Mpa	190°	4	53	309.82
Ub4 Dd3	2Mpa	190°	4	54	133.43
Ub4 Dd3	2Mpa	190°	4	55	210.84
Ub4 Dd3	2Mpa	190°	4	56	249.63
Ub4 Dd3	2Mpa	190°	4	57	342.5
Ub4 Dd3	2Mpa	190°	4	58	80.95
Ub4 Dd3	2Mpa	190°	4	59	150.05
Ub4 Dd3	2Mpa	190°	4	60	204.51
Ua3 Dc2	2Mpa	190°	5	1	151.4
Ua3 Dc2	2Mpa	190°	5	2	173.04
Ua3 Dc2	2Mpa	190°	5	3	230.53
Ua3 Dc2	2Mpa	190°	5	4	298.19
Ua3 Dc2	2Mpa	190°	5	5	163.27
Ua3 Dc2	2Mpa	190°	5	6	196.34
Ua3 Dc2	2Mpa	190°	5	7	211.9
Ua3 Dc2	2Mpa	190°	5	8	173.45
Ua3 Dc2	2Mpa	190°	5	9	203.82
Ua3 Dc2	2Mpa	190°	5	10	176.44
Ua3 Dc2	2Mpa	190°	5	11	232.84
Ua3 Dc2	2Mpa	190°	5	12	113.28
Ua3 Dc2	2Mpa	190°	5	13	153.33
Ua3 Dc2	2Mpa	190°	5	14	125.23
Ua3 Dc2	2Mpa	190°	5	15	229.62
Ua3 Dc2	2Mpa	190°	5	16	5
Ua3 Dc2	2Mpa	190°	5	17	5
Ua3 Dc2	2Mpa	190°	5	18	7.91
Ua3 Dc2	2Mpa	190°	5	19	7.91
Ua3 Dc2	2Mpa	190°	5	20	12.75
Ua3 Dc2	2Mpa	190°	5	21	3.54
Ua3 Dc2	2Mpa	190°	5	22	2.5
Ua3 Dc2	2Mpa	190°	5	23	2.5
Ua3 Dc2	2Mpa	190°	5	24	2.5
Ua3 Dc2	2Mpa	190°	5	25	5
Ua3 Dc2	2Mpa	190°	5	26	5
Ua3 Dc2	2Mpa	190°	5	27	5
Ua3 Dc2	2Mpa	190°	5	28	10
Ua3 Dc2	2Mpa	190°	5	29	2.5
Ua3 Dc2	2Mpa	190°	5	30	5.59
Ua3 Dc2	2Mpa	190°	5	31	68.65
Ua3 Dc2	2Mpa	190°	5	32	47.76
Ua3 Dc2	2Mpa	190°	5	33	45.62
Ua3 Dc2	2Mpa	190°	5	34	60.47
Ua3 Dc2	2Mpa	190°	5	35	40.7
Ua3 Dc2	2Mpa	190°	5	36	77.02
Ua3 Dc2	2Mpa	190°	5	37	58.84
Ua3 Dc2	2Mpa	190°	5	38	57.99
Ua3 Dc2	2Mpa	190°	5	39	58.36
Ua3 Dc2	2Mpa	190°	5	40	58.36
Ua3 Dc2	2Mpa	190°	5	41	50.99
Ua3 Dc2	2Mpa	190°	5	42	57.01
Ua3 Dc2	2Mpa	190°	5	43	49.12
Ua3 Dc2	2Mpa	190°	5	44	78.14
Ua3 Dc2	2Mpa	190°	5	45	55.9
Ua3 Dc2	2Mpa	190°	5	46	222.77
Ua3 Dc2	2Mpa	190°	5	47	156.57
Ua3 Dc2	2Mpa	190°	5	48	226.99
Ua3 Dc2	2Mpa	190°	5	49	188.77
Ua3 Dc2	2Mpa	190°	5	50	275.42
Ua3 Dc2	2Mpa	190°	5	51	180.85
Ua3 Dc2	2Mpa	190°	5	52	149.1
Ua3 Dc2	2Mpa	190°	5	53	160.65
Ua3 Dc2	2Mpa	190°	5	54	127.53
Ua3 Dc2	2Mpa	190°	5	55	164.39
Ua3 Dc2	2Mpa	190°	5	56	195.08
Ua3 Dc2	2Mpa	190°	5	57	194.78
Ua3 Dc2	2Mpa	190°	5	58	248.36
Ua3 Dc2	2Mpa	190°	5	59	124.43
Ua3 Dc2	2Mpa	190°	5	60	160.93
Ub4 Dd3	2Mpa	190°	5	1	195.02
Ub4 Dd3	2Mpa	190°	5	2	178.21
Ub4 Dd3	2Mpa	190°	5	3	131.65
Ub4 Dd3	2Mpa	190°	5	4	264.38
Ub4 Dd3	2Mpa	190°	5	5	134.01
Ub4 Dd3	2Mpa	190°	5	6	176.17
Ub4 Dd3	2Mpa	190°	5	7	158.28
Ub4 Dd3	2Mpa	190°	5	8	142.49
Ub4 Dd3	2Mpa	190°	5	9	110.8
Ub4 Dd3	2Mpa	190°	5	10	117.75
Ub4 Dd3	2Mpa	190°	5	11	151.73
Ub4 Dd3	2Mpa	190°	5	12	114.66
Ub4 Dd3	2Mpa	190°	5	13	130.25
Ub4 Dd3	2Mpa	190°	5	14	197.15
Ub4 Dd3	2Mpa	190°	5	15	233.01
Ub4 Dd3	2Mpa	190°	5	16	7.29
Ub4 Dd3	2Mpa	190°	5	17	2.86
Ub4 Dd3	2Mpa	190°	5	18	8.34
Ub4 Dd3	2Mpa	190°	5	19	4.52
Ub4 Dd3	2Mpa	190°	5	20	6.06
Ub4 Dd3	2Mpa	190°	5	21	2.02
Ub4 Dd3	2Mpa	190°	5	22	6.06
Ub4 Dd3	2Mpa	190°	5	23	6.39
Ub4 Dd3	2Mpa	190°	5	24	2.02
Ub4 Dd3	2Mpa	190°	5	25	14.72
Ub4 Dd3	2Mpa	190°	5	26	9.04
Ub4 Dd3	2Mpa	190°	5	27	2.02
Ub4 Dd3	2Mpa	190°	5	28	2.02
Ub4 Dd3	2Mpa	190°	5	29	8.09
Ub4 Dd3	2Mpa	190°	5	30	4.52
Ub4 Dd3	2Mpa	190°	5	31	58.36
Ub4 Dd3	2Mpa	190°	5	32	44.42
Ub4 Dd3	2Mpa	190°	5	33	64.55
Ub4 Dd3	2Mpa	190°	5	34	45.25
Ub4 Dd3	2Mpa	190°	5	35	55.23
Ub4 Dd3	2Mpa	190°	5	36	42.54
Ub4 Dd3	2Mpa	190°	5	37	45.48
Ub4 Dd3	2Mpa	190°	5	38	41.5
Ub4 Dd3	2Mpa	190°	5	39	52.49
Ub4 Dd3	2Mpa	190°	5	40	45.25
Ub4 Dd3	2Mpa	190°	5	41	51.59
Ub4 Dd3	2Mpa	190°	5	42	62.5
Ub4 Dd3	2Mpa	190°	5	43	52.49
Ub4 Dd3	2Mpa	190°	5	44	32.63
Ub4 Dd3	2Mpa	190°	5	45	41.72
Ub4 Dd3	2Mpa	190°	5	46	219.52
Ub4 Dd3	2Mpa	190°	5	47	224.27
Ub4 Dd3	2Mpa	190°	5	48	172.84
Ub4 Dd3	2Mpa	190°	5	49	185.31
Ub4 Dd3	2Mpa	190°	5	50	226.19
Ub4 Dd3	2Mpa	190°	5	51	109.45
Ub4 Dd3	2Mpa	190°	5	52	178.46
Ub4 Dd3	2Mpa	190°	5	53	232.79
Ub4 Dd3	2Mpa	190°	5	54	205.56
Ub4 Dd3	2Mpa	190°	5	55	101.99
Ub4 Dd3	2Mpa	190°	5	56	146.52
Ub4 Dd3	2Mpa	190°	5	57	126.66
Ub4 Dd3	2Mpa	190°	5	58	96.71
Ub4 Dd3	2Mpa	190°	5	59	74.88
Ub4 Dd3	2Mpa	190°	5	60	101.64
Uc5 Dc3	2Mpa	30°	1	1	121.32
Uc5 Dc3	2Mpa	30°	1	2	128.98
Uc5 Dc3	2Mpa	30°	1	3	155.95
Uc5 Dc3	2Mpa	30°	1	4	142.94
Uc5 Dc3	2Mpa	30°	1	5	124.63
Uc5 Dc3	2Mpa	30°	1	6	158.25
Uc5 Dc3	2Mpa	30°	1	7	148.45
Uc5 Dc3	2Mpa	30°	1	8	187.68
Uc5 Dc3	2Mpa	30°	1	9	119.15
Uc5 Dc3	2Mpa	30°	1	10	132.79
Uc5 Dc3	2Mpa	30°	1	11	124.74
Uc5 Dc3	2Mpa	30°	1	12	141.65
Uc5 Dc3	2Mpa	30°	1	13	196.06
Uc5 Dc3	2Mpa	30°	1	14	104.43
Uc5 Dc3	2Mpa	30°	1	15	165.11
Uc5 Dc3	2Mpa	30°	1	16	4.77
Uc5 Dc3	2Mpa	30°	1	17	4.77
Uc5 Dc3	2Mpa	30°	1	18	5.32
Uc5 Dc3	2Mpa	30°	1	19	4.76
Uc5 Dc3	2Mpa	30°	1	20	6.74
Uc5 Dc3	2Mpa	30°	1	21	2.38
Uc5 Dc3	2Mpa	30°	1	22	8.59
Uc5 Dc3	2Mpa	30°	1	23	5.32
Uc5 Dc3	2Mpa	30°	1	24	5.33
Uc5 Dc3	2Mpa	30°	1	25	8.59
Uc5 Dc3	2Mpa	30°	1	26	13.89
Uc5 Dc3	2Mpa	30°	1	27	6.74
Uc5 Dc3	2Mpa	30°	1	28	7.15
Uc5 Dc3	2Mpa	30°	1	29	8.59
Uc5 Dc3	2Mpa	30°	1	30	5.33
Uc5 Dc3	2Mpa	30°	1	31	33.69
Uc5 Dc3	2Mpa	30°	1	32	30.5
Uc5 Dc3	2Mpa	30°	1	33	36.37
Uc5 Dc3	2Mpa	30°	1	34	39.44
Uc5 Dc3	2Mpa	30°	1	35	34.36
Uc5 Dc3	2Mpa	30°	1	36	27.79
Uc5 Dc3	2Mpa	30°	1	37	38.42
Uc5 Dc3	2Mpa	30°	1	38	33.86
Uc5 Dc3	2Mpa	30°	1	39	31.97
Uc5 Dc3	2Mpa	30°	1	40	51.54
Uc5 Dc3	2Mpa	30°	1	41	38.78
Uc5 Dc3	2Mpa	30°	1	42	40.99
Uc5 Dc3	2Mpa	30°	1	43	32.4
Uc5 Dc3	2Mpa	30°	1	44	40.57
Uc5 Dc3	2Mpa	30°	1	45	42.14
Uc5 Dc3	2Mpa	30°	1	46	131.51
Uc5 Dc3	2Mpa	30°	1	47	176.55
Uc5 Dc3	2Mpa	30°	1	48	212.94
Uc5 Dc3	2Mpa	30°	1	49	162.54
Uc5 Dc3	2Mpa	30°	1	50	150.35
Uc5 Dc3	2Mpa	30°	1	51	150.18
Uc5 Dc3	2Mpa	30°	1	52	92.8
Uc5 Dc3	2Mpa	30°	1	53	121.8
Uc5 Dc3	2Mpa	30°	1	54	130.59
Uc5 Dc3	2Mpa	30°	1	55	140.91
Uc5 Dc3	2Mpa	30°	1	56	192.5
Uc5 Dc3	2Mpa	30°	1	57	128.88
Uc5 Dc3	2Mpa	30°	1	58	227.42
Uc5 Dc3	2Mpa	30°	1	59	113.73
Uc5 Dc3	2Mpa	30°	1	60	128.19
Ub3 Db1	2Mpa	30°	1	1	167
Ub3 Db1	2Mpa	30°	1	2	202.59
Ub3 Db1	2Mpa	30°	1	3	185.69
Ub3 Db1	2Mpa	30°	1	4	127.64
Ub3 Db1	2Mpa	30°	1	5	145.47
Ub3 Db1	2Mpa	30°	1	6	164.72
Ub3 Db1	2Mpa	30°	1	7	171.33
Ub3 Db1	2Mpa	30°	1	8	167.64
Ub3 Db1	2Mpa	30°	1	9	173.45
Ub3 Db1	2Mpa	30°	1	10	224.86
Ub3 Db1	2Mpa	30°	1	11	197.08
Ub3 Db1	2Mpa	30°	1	12	119.32
Ub3 Db1	2Mpa	30°	1	13	129.91
Ub3 Db1	2Mpa	30°	1	14	107.92
Ub3 Db1	2Mpa	30°	1	15	83.48
Ub3 Db1	2Mpa	30°	1	16	2.05
Ub3 Db1	2Mpa	30°	1	17	4.1
Ub3 Db1	2Mpa	30°	1	18	2.05
Ub3 Db1	2Mpa	30°	1	19	2.9
Ub3 Db1	2Mpa	30°	1	20	6.15
Ub3 Db1	2Mpa	30°	1	21	2.9
Ub3 Db1	2Mpa	30°	1	22	4.1
Ub3 Db1	2Mpa	30°	1	23	2.05
Ub3 Db1	2Mpa	30°	1	24	4.1
Ub3 Db1	2Mpa	30°	1	25	5.8
Ub3 Db1	2Mpa	30°	1	26	6.49
Ub3 Db1	2Mpa	30°	1	27	2.9
Ub3 Db1	2Mpa	30°	1	28	2.9
Ub3 Db1	2Mpa	30°	1	29	2.05
Ub3 Db1	2Mpa	30°	1	30	2.9
Ub3 Db1	2Mpa	30°	1	31	21.41
Ub3 Db1	2Mpa	30°	1	32	31.37
Ub3 Db1	2Mpa	30°	1	33	39.61
Ub3 Db1	2Mpa	30°	1	34	36.34
Ub3 Db1	2Mpa	30°	1	35	38.31
Ub3 Db1	2Mpa	30°	1	36	42.82
Ub3 Db1	2Mpa	30°	1	37	24
Ub3 Db1	2Mpa	30°	1	38	45.53
Ub3 Db1	2Mpa	30°	1	39	39.18
Ub3 Db1	2Mpa	30°	1	40	43.26
Ub3 Db1	2Mpa	30°	1	41	43.11
Ub3 Db1	2Mpa	30°	1	42	43.5
Ub3 Db1	2Mpa	30°	1	43	37.42
Ub3 Db1	2Mpa	30°	1	44	41.83
Ub3 Db1	2Mpa	30°	1	45	44.27
Ub3 Db1	2Mpa	30°	1	46	183.07
Ub3 Db1	2Mpa	30°	1	47	108.06
Ub3 Db1	2Mpa	30°	1	48	104.59
Ub3 Db1	2Mpa	30°	1	49	174.42
Ub3 Db1	2Mpa	30°	1	50	192.65
Ub3 Db1	2Mpa	30°	1	51	167.96
Ub3 Db1	2Mpa	30°	1	52	185.43
Ub3 Db1	2Mpa	30°	1	53	162.47
Ub3 Db1	2Mpa	30°	1	54	252.1
Ub3 Db1	2Mpa	30°	1	55	128.2
Ub3 Db1	2Mpa	30°	1	56	143.99
Ub3 Db1	2Mpa	30°	1	57	236.06
Ub3 Db1	2Mpa	30°	1	58	152.17
Ub3 Db1	2Mpa	30°	1	59	66.96
Ub3 Db1	2Mpa	30°	1	60	129.12
Uc5 Dc3	2Mpa	30°	2	1	147.97
Uc5 Dc3	2Mpa	30°	2	2	161.5
Uc5 Dc3	2Mpa	30°	2	3	86.39
Uc5 Dc3	2Mpa	30°	2	4	199.52
Uc5 Dc3	2Mpa	30°	2	5	148.21
Uc5 Dc3	2Mpa	30°	2	6	160.41
Uc5 Dc3	2Mpa	30°	2	7	109.39
Uc5 Dc3	2Mpa	30°	2	8	132.58
Uc5 Dc3	2Mpa	30°	2	9	107.93
Uc5 Dc3	2Mpa	30°	2	10	114.51
Uc5 Dc3	2Mpa	30°	2	11	140.15
Uc5 Dc3	2Mpa	30°	2	12	216.91
Uc5 Dc3	2Mpa	30°	2	13	194.16
Uc5 Dc3	2Mpa	30°	2	14	138.33
Uc5 Dc3	2Mpa	30°	2	15	65.62
Uc5 Dc3	2Mpa	30°	2	16	4.59
Uc5 Dc3	2Mpa	30°	2	17	12.32
Uc5 Dc3	2Mpa	30°	2	18	11.06
Uc5 Dc3	2Mpa	30°	2	19	4.11
Uc5 Dc3	2Mpa	30°	2	20	12.49
Uc5 Dc3	2Mpa	30°	2	21	6.16
Uc5 Dc3	2Mpa	30°	2	22	2.06
Uc5 Dc3	2Mpa	30°	2	23	2.9
Uc5 Dc3	2Mpa	30°	2	24	4.11
Uc5 Dc3	2Mpa	30°	2	25	4.59
Uc5 Dc3	2Mpa	30°	2	26	4.11
Uc5 Dc3	2Mpa	30°	2	27	4.11
Uc5 Dc3	2Mpa	30°	2	28	6.16
Uc5 Dc3	2Mpa	30°	2	29	10.27
Uc5 Dc3	2Mpa	30°	2	30	2.05
Uc5 Dc3	2Mpa	30°	2	31	38.97
Uc5 Dc3	2Mpa	30°	2	32	34.42
Uc5 Dc3	2Mpa	30°	2	33	31.28
Uc5 Dc3	2Mpa	30°	2	34	37.76
Uc5 Dc3	2Mpa	30°	2	35	35.34
Uc5 Dc3	2Mpa	30°	2	36	35.09
Uc5 Dc3	2Mpa	30°	2	37	29.41
Uc5 Dc3	2Mpa	30°	2	38	27.55
Uc5 Dc3	2Mpa	30°	2	39	35.87
Uc5 Dc3	2Mpa	30°	2	40	36.74
Uc5 Dc3	2Mpa	30°	2	41	30.53
Uc5 Dc3	2Mpa	30°	2	42	34.42
Uc5 Dc3	2Mpa	30°	2	43	37.76
Uc5 Dc3	2Mpa	30°	2	44	32.15
Uc5 Dc3	2Mpa	30°	2	45	40.46
Uc5 Dc3	2Mpa	30°	2	46	143.09
Uc5 Dc3	2Mpa	30°	2	47	157.34
Uc5 Dc3	2Mpa	30°	2	48	131.42
Uc5 Dc3	2Mpa	30°	2	49	170.39
Uc5 Dc3	2Mpa	30°	2	50	154.83
Uc5 Dc3	2Mpa	30°	2	51	190.26
Uc5 Dc3	2Mpa	30°	2	52	173.27
Uc5 Dc3	2Mpa	30°	2	53	158.4
Uc5 Dc3	2Mpa	30°	2	54	132.81
Uc5 Dc3	2Mpa	30°	2	55	104.74
Uc5 Dc3	2Mpa	30°	2	56	152.27
Uc5 Dc3	2Mpa	30°	2	57	120.17
Uc5 Dc3	2Mpa	30°	2	58	90.82
Uc5 Dc3	2Mpa	30°	2	59	141
Uc5 Dc3	2Mpa	30°	2	60	110.67
Ub3 Db1	2Mpa	30°	2	1	206.24
Ub3 Db1	2Mpa	30°	2	2	135.33
Ub3 Db1	2Mpa	30°	2	3	187.41
Ub3 Db1	2Mpa	30°	2	4	195.19
Ub3 Db1	2Mpa	30°	2	5	165.33
Ub3 Db1	2Mpa	30°	2	6	187.64
Ub3 Db1	2Mpa	30°	2	7	175.45
Ub3 Db1	2Mpa	30°	2	8	143.66
Ub3 Db1	2Mpa	30°	2	9	117.27
Ub3 Db1	2Mpa	30°	2	10	143.89
Ub3 Db1	2Mpa	30°	2	11	137.33
Ub3 Db1	2Mpa	30°	2	12	149.37
Ub3 Db1	2Mpa	30°	2	13	191.84
Ub3 Db1	2Mpa	30°	2	14	118.51
Ub3 Db1	2Mpa	30°	2	15	121.36
Ub3 Db1	2Mpa	30°	2	16	2.02
Ub3 Db1	2Mpa	30°	2	17	10.11
Ub3 Db1	2Mpa	30°	2	18	2.02
Ub3 Db1	2Mpa	30°	2	19	6.07
[truncated: 1,601 more rows]

## Sheet: Supplemental Table 5
Normal effective stress (MPa)	Rotation angle (°)	Shear displacement (mm)	Deformation bands (μm)
1	90	62.8319	230.02
1	90	62.8319	235.9
1	90	62.8319	237.09
1	90	62.8319	239.56
1	90	62.8319	241.66
1	90	62.8319	242.75
1	90	62.8319	244.44
1	90	62.8319	245.31
1	90	62.8319	254.39
1	90	62.8319	256.29
1	90	62.8319	262.26
1	90	62.8319	262.77
1	90	62.8319	279.78
1	90	62.8319	281.03
1	90	62.8319	282.86
1	90	62.8319	286.41
1	90	62.8319	288.63
1	90	62.8319	288.75
1	90	62.8319	289.65
1	90	62.8319	291.93
1	90	62.8319	293.81
1	90	62.8319	294.57
1	90	62.8319	295.45
1	90	62.8319	297.15
1	90	62.8319	298.28
1	90	62.8319	300.92
1	90	62.8319	303.57
1	90	62.8319	304.25
1	90	62.8319	304.5
1	90	62.8319	305.47
1	90	62.8319	306.67
1	90	62.8319	306.71
1	90	62.8319	307.35
1	90	62.8319	309.46
1	90	62.8319	309.46
1	90	62.8319	311.15
1	90	62.8319	314.17
1	90	62.8319	316
1	90	62.8319	317.34
1	90	62.8319	318.95
1	90	62.8319	321.87
1	90	62.8319	322.17
1	90	62.8319	328.81
1	90	62.8319	336.06
1	90	62.8319	337.03
1	90	62.8319	348.32
1	90	62.8319	391.87
1	90	62.8319	405.73
1	90	62.8319	414.23
1	90	76.5763	188.68
1	90	76.5763	229.45
1	90	76.5763	232.35
1	90	76.5763	232.35
1	90	76.5763	232.64
1	90	76.5763	235.11
1	90	76.5763	235.26
1	90	76.5763	238.07
1	90	76.5763	240.9
1	90	76.5763	240.92
1	90	76.5763	240.97
1	90	76.5763	246.98
1	90	76.5763	252.51
1	90	76.5763	252.66
1	90	76.5763	261.28
1	90	76.5763	261.28
1	90	76.5763	264.13
1	90	76.5763	267.27
1	90	76.5763	269.94
1	90	76.5763	272.96
1	90	76.5763	284.04
1	90	76.5763	284.8
1	90	76.5763	295.94
1	90	76.5763	296.79
1	90	76.5763	310.32
1	90	76.5763	311.91
1	90	76.5763	334.11
1	90	76.5763	361.22
1	90	76.5763	402.41
1	90	76.5763	413.32
1	90	90.3208	147.37
1	90	90.3208	147.52
1	90	90.3208	151.17
1	90	90.3208	177.64
1	90	90.3208	203.5
1	90	90.3208	203.91
1	90	90.3208	206.58
1	90	90.3208	209.12
1	90	90.3208	218.25
1	90	90.3208	220.96
1	90	90.3208	226.77
1	90	90.3208	227.08
1	90	90.3208	227.29
1	90	90.3208	230.19
1	90	90.3208	232.19
1	90	90.3208	239.12
1	90	90.3208	250.35
1	90	90.3208	253.29
1	90	90.3208	253.34
1	90	90.3208	255.48
1	90	90.3208	256.74
1	90	90.3208	258.9
1	90	90.3208	262.18
1	90	90.3208	264.18
1	90	90.3208	264.37
1	90	90.3208	267.59
1	90	90.3208	270.96
1	90	90.3208	272.96
1	90	90.3208	273.91
1	90	90.3208	275.73
1	90	90.3208	275.73
1	90	90.3208	275.97
1	90	90.3208	276.28
1	90	90.3208	278.63
1	90	90.3208	279.17
1	90	90.3208	281.59
1	90	90.3208	282.97
1	90	90.3208	284.57
1	90	90.3208	290.37
1	90	90.3208	291.7
1	90	90.3208	291.8
1	90	90.3208	294.52
1	90	90.3208	296.17
1	90	90.3208	297.82
1	90	90.3208	299.17
1	90	90.3208	300.41
1	90	90.3208	302.35
1	90	90.3208	303.34
1	90	90.3208	304.75
1	90	90.3208	309.29
1	90	90.3208	309.36
1	90	90.3208	316.84
1	90	90.3208	327.02
1	90	90.3208	328.09
1	90	90.3208	335.86
1	90	90.3208	347.52
1	90	90.3208	365.19
1	90	90.3208	365.2
1	90	90.3208	365.49
1	90	90.3208	374.31
1	90	104.065	184.37
1	90	104.065	191.96
1	90	104.065	195.52
1	90	104.065	199.68
1	90	104.065	206.71
1	90	104.065	210.26
1	90	104.065	210.85
1	90	104.065	215.86
1	90	104.065	234.91
1	90	104.065	239.57
1	90	104.065	240.21
1	90	104.065	241.38
1	90	104.065	243.96
1	90	104.065	244.67
1	90	104.065	246.69
1	90	104.065	246.88
1	90	104.065	248.21
1	90	104.065	248.51
1	90	104.065	249.79
1	90	104.065	250.99
1	90	104.065	255.88
1	90	104.065	257.89
1	90	104.065	258.84
1	90	104.065	260.03
1	90	104.065	260.36
1	90	104.065	267.98
1	90	104.065	282.37
1	90	104.065	294.13
1	90	104.065	297.07
1	90	104.065	297.19
1	90	104.065	300.01
1	90	104.065	305.88
1	90	104.065	307.14
1	90	104.065	311.82
1	90	104.065	320.64
1	90	104.065	320.71
1	90	104.065	322.14
1	90	104.065	332.35
1	90	104.065	349.28
1	90	104.065	350.51
1	90	104.065	357.63
1	90	104.065	373.58
1	90	104.065	382.4
1	90	104.065	391.19
1	90	104.065	394.13
1	90	104.065	398.8
1	90	104.065	400.17
1	90	104.065	417.91
1	90	104.065	420.6
1	90	104.065	420.96
1	90	104.065	420.96
1	90	104.065	429.41
1	90	104.065	429.42
1	90	104.065	429.5
1	90	104.065	429.66
1	90	104.065	441.27
1	90	104.065	444.13
1	90	104.065	444.21
1	90	104.065	450.04
1	90	104.065	461.8
1	90	117.81	222.57
1	90	117.81	222.81
1	90	117.81	227.24
1	90	117.81	227.48
1	90	117.81	230.17
1	90	117.81	236.3
1	90	117.81	236.6
1	90	117.81	240.03
1	90	117.81	240.03
1	90	117.81	247.7
1	90	117.81	248.25
1	90	117.81	254.1
1	90	117.81	254.93
1	90	117.81	255.75
1	90	117.81	257.39
1	90	117.81	258.82
1	90	117.81	262.11
1	90	117.81	262.11
1	90	117.81	263.19
1	90	117.81	264.32
1	90	117.81	268.16
1	90	117.81	268.29
1	90	117.81	268.29
1	90	117.81	269.77
1	90	117.81	272.54
1	90	117.81	272.84
1	90	117.81	273.21
1	90	117.81	275.19
1	90	117.81	275.57
1	90	117.81	278.04
1	90	117.81	278.15
1	90	117.81	278.56
1	90	117.81	278.77
1	90	117.81	280.18
1	90	117.81	286.21
1	90	117.81	287.2
1	90	117.81	287.57
1	90	117.81	289.1
1	90	117.81	290.76
1	90	117.81	291.79
1	90	117.81	291.99
1	90	117.81	292.32
1	90	117.81	294.87
1	90	117.81	296.33
1	90	117.81	299.14
1	90	117.81	302.07
1	90	117.81	306.32
1	90	117.81	308.76
1	90	117.81	309.18
1	90	117.81	313.58
1	90	117.81	313.79
1	90	117.81	317.03
1	90	117.81	317.69
1	90	117.81	319.21
1	90	117.81	323.93
1	90	117.81	328.47
1	90	117.81	330.84
1	90	117.81	331.65
1	90	117.81	346.01
1	90	117.81	359.29
1.5	90	62.8319	147.18
1.5	90	62.8319	152.94
1.5	90	62.8319	153.65
1.5	90	62.8319	158.93
1.5	90	62.8319	161.79
1.5	90	62.8319	170.59
1.5	90	62.8319	170.99
1.5	90	62.8319	176.5
1.5	90	62.8319	179.44
1.5	90	62.8319	185.39
1.5	90	62.8319	185.39
1.5	90	62.8319	188.6
1.5	90	62.8319	188.6
1.5	90	62.8319	194.21
1.5	90	62.8319	194.32
1.5	90	62.8319	197.06
1.5	90	62.8319	200.02
1.5	90	62.8319	200.35
1.5	90	62.8319	208.91
1.5	90	62.8319	211.85
1.5	90	62.8319	214.79
1.5	90	62.8319	214.89
1.5	90	62.8319	216.99
1.5	90	62.8319	222.83
1.5	90	62.8319	223.7
1.5	90	62.8319	225.75
1.5	90	62.8319	229.43
1.5	90	62.8319	229.71
1.5	90	62.8319	241.19
1.5	90	62.8319	241.34
1.5	90	62.8319	241.34
1.5	90	62.8319	246.98
1.5	90	62.8319	247.06
1.5	90	62.8319	249.49
1.5	90	62.8319	249.89
1.5	90	62.8319	250.07
1.5	90	62.8319	256.15
1.5	90	62.8319	258.26
1.5	90	62.8319	258.64
1.5	90	62.8319	261.97
1.5	90	62.8319	263.17
1.5	90	62.8319	264.1
1.5	90	62.8319	267.8
1.5	90	62.8319	269.61
1.5	90	62.8319	276.16
1.5	90	62.8319	282.38
1.5	90	62.8319	283.71
1.5	90	62.8319	287.64
1.5	90	62.8319	288.63
1.5	90	62.8319	290.02
1.5	90	62.8319	290.77
1.5	90	62.8319	292.27
1.5	90	62.8319	294.06
1.5	90	62.8319	298.24
1.5	90	62.8319	299.76
1.5	90	62.8319	306.53
1.5	90	62.8319	332.06
1.5	90	62.8319	344.47
1.5	90	62.8319	359.45
1.5	90	62.8319	380.67
1.5	90	76.5763	128.44
1.5	90	76.5763	132.91
1.5	90	76.5763	139.53
1.5	90	76.5763	148.62
1.5	90	76.5763	148.62
1.5	90	76.5763	157.19
1.5	90	76.5763	159.24
1.5	90	76.5763	163.91
1.5	90	76.5763	168.81
1.5	90	76.5763	171.53
1.5	90	76.5763	172.51
1.5	90	76.5763	176.36
1.5	90	76.5763	176.74
1.5	90	76.5763	179.22
1.5	90	76.5763	179.22
1.5	90	76.5763	181.27
1.5	90	76.5763	184.22
1.5	90	76.5763	185.18
1.5	90	76.5763	186.94
1.5	90	76.5763	188.01
1.5	90	76.5763	189.8
1.5	90	76.5763	190.74
1.5	90	76.5763	191.12
1.5	90	76.5763	191.77
1.5	90	76.5763	191.93
1.5	90	76.5763	192.83
1.5	90	76.5763	193.63
1.5	90	76.5763	195.34
1.5	90	76.5763	198.14
1.5	90	76.5763	199.92
1.5	90	76.5763	201.26
1.5	90	76.5763	202.24
1.5	90	76.5763	203.21
1.5	90	76.5763	204.64
1.5	90	76.5763	205.6
1.5	90	76.5763	206.54
1.5	90	76.5763	207.32
1.5	90	76.5763	207.74
1.5	90	76.5763	212.42
1.5	90	76.5763	213.12
1.5	90	76.5763	214.69
1.5	90	76.5763	219.82
1.5	90	76.5763	221.46
1.5	90	76.5763	222.38
1.5	90	76.5763	226.2
1.5	90	76.5763	228.96
1.5	90	76.5763	230.75
1.5	90	76.5763	233.28
1.5	90	76.5763	233.8
1.5	90	76.5763	234.44
1.5	90	76.5763	238.14
1.5	90	76.5763	239
1.5	90	76.5763	252.06
1.5	90	76.5763	252.73
1.5	90	76.5763	254.89
1.5	90	76.5763	256.18
1.5	90	76.5763	263.6
1.5	90	76.5763	271.68
1.5	90	76.5763	276.47
1.5	90	76.5763	291.15
1.5	90	90.3208	147.32
1.5	90	90.3208	154.6
1.5	90	90.3208	155.35
1.5	90	90.3208	156.97
1.5	90	90.3208	157.34
1.5	90	90.3208	160.52
1.5	90	90.3208	162.01
1.5	90	90.3208	164.42
1.5	90	90.3208	165.13
1.5	90	90.3208	169.79
1.5	90	90.3208	170.82
1.5	90	90.3208	173.75
1.5	90	90.3208	181.45
1.5	90	90.3208	181.92
1.5	90	90.3208	183.21
1.5	90	90.3208	186.27
1.5	90	90.3208	187.63
1.5	90	90.3208	189.83
1.5	90	90.3208	191.19
1.5	90	90.3208	191.54
1.5	90	90.3208	192.73
1.5	90	90.3208	194.78
1.5	90	90.3208	194.79
1.5	90	90.3208	197.61
1.5	90	90.3208	200.93
1.5	90	90.3208	201.23
1.5	90	90.3208	202.86
1.5	90	90.3208	213.28
1.5	90	90.3208	216.97
1.5	90	90.3208	217.79
1.5	90	90.3208	231.69
1.5	90	90.3208	234.21
1.5	90	90.3208	236.54
1.5	90	90.3208	237.13
1.5	90	90.3208	239.46
1.5	90	90.3208	240.84
1.5	90	90.3208	241.29
1.5	90	90.3208	242.03
1.5	90	90.3208	244.85
1.5	90	90.3208	246.89
1.5	90	90.3208	248.48
1.5	90	90.3208	251.4
1.5	90	90.3208	251.73
1.5	90	90.3208	259.18
1.5	90	90.3208	260.84
1.5	90	90.3208	261.22
1.5	90	90.3208	263.1
1.5	90	90.3208	263.76
1.5	90	90.3208	267.05
1.5	90	90.3208	267.09
1.5	90	90.3208	278.53
1.5	90	90.3208	279.53
1.5	90	90.3208	279.53
1.5	90	90.3208	283.01
1.5	90	90.3208	284.21
1.5	90	90.3208	287.85
1.5	90	90.3208	288.26
1.5	90	90.3208	325.79
1.5	90	90.3208	349.16
1.5	90	90.3208	365.21
1.5	90	104.065	134.4
1.5	90	104.065	149.55
1.5	90	104.065	160.93
1.5	90	104.065	166.65
1.5	90	104.065	168.54
1.5	90	104.065	178.99
1.5	90	104.065	180.74
1.5	90	104.065	188.83
1.5	90	104.065	191.34
1.5	90	104.065	205.03
1.5	90	104.065	205.5
1.5	90	104.065	205.76
1.5	90	104.065	205.76
1.5	90	104.065	207.41
1.5	90	104.065	210.04
1.5	90	104.065	211.58
1.5	90	104.065	225.36
1.5	90	104.065	228.24
1.5	90	104.065	236.83
1.5	90	104.065	237.6
1.5	90	104.065	256.69
1.5	90	104.065	266.25
1.5	90	104.065	269.05
1.5	90	104.065	271.09
1.5	90	104.065	289.83
1.5	90	104.065	300.76
1.5	90	104.065	304.04
1.5	90	104.065	304.04
1.5	90	104.065	309.74
1.5	90	104.065	311.11
1.5	90	104.065	311.11
1.5	90	104.065	311.9
1.5	90	104.065	312.52
1.5	90	104.065	313.06
1.5	90	104.065	314.88
1.5	90	104.065	315.62
1.5	90	104.065	315.62
1.5	90	104.065	318.94
1.5	90	104.065	319.17
1.5	90	104.065	321.5
1.5	90	104.065	322.64
1.5	90	104.065	324.29
1.5	90	104.065	324.81
1.5	90	104.065	330.49
1.5	90	104.065	332.81
1.5	90	104.065	342.65
1.5	90	104.065	348.32
1.5	90	104.065	351.07
1.5	90	104.065	354.19
1.5	90	104.065	354.4
1.5	90	104.065	360.5
1.5	90	104.065	361.03
1.5	90	104.065	362.02
1.5	90	104.065	362.26
1.5	90	104.065	363.44
1.5	90	104.065	378.36
1.5	90	104.065	379.93
1.5	90	104.065	402.78
1.5	90	104.065	403.49
1.5	90	104.065	453.92
1.5	90	117.81	459.9
1.5	90	117.81	471.22
1.5	90	117.81	474.16
1.5	90	117.81	474.74
1.5	90	117.81	479.42
1.5	90	117.81	482.96
1.5	90	117.81	483.64
1.5	90	117.81	487.68
1.5	90	117.81	489.77
1.5	90	117.81	490.87
1.5	90	117.81	496.03
1.5	90	117.81	497.29
1.5	90	117.81	497.73
1.5	90	117.81	500.74
1.5	90	117.81	500.97
1.5	90	117.81	504.47
1.5	90	117.81	505.8
1.5	90	117.81	507.41
1.5	90	117.81	511.41
1.5	90	117.81	512.48
1.5	90	117.81	521.69
1.5	90	117.81	524.63
2	90	62.8319	204.57
2	90	62.8319	243.74
2	90	62.8319	281.83
2	90	62.8319	291.53
2	90	62.8319	295.73
2	90	62.8319	299.41
2	90	62.8319	306.41
2	90	62.8319	310.17
2	90	62.8319	310.78
2	90	62.8319	313.06
2	90	62.8319	320.65
2	90	62.8319	322.34
2	90	62.8319	325.24
2	90	62.8319	325.77
2	90	62.8319	327.06
2	90	62.8319	327.96
2	90	62.8319	329.98
2	90	62.8319	331.46
2	90	62.8319	334.9
2	90	62.8319	338.38
2	90	62.8319	343.69
2	90	62.8319	344.74
2	90	62.8319	347.19
2	90	62.8319	353.52
2	90	62.8319	356.16
2	90	62.8319	356.26
2	90	62.8319	358.85
2	90	62.8319	373.86
2	90	62.8319	375.65
2	90	62.8319	375.93
2	90	62.8319	391.9
2	90	62.8319	420.98
2	90	76.5763	152.38
2	90	76.5763	176.98
2	90	76.5763	194.56
2	90	76.5763	206.27
2	90	76.5763	207.93
2	90	76.5763	209.34
2	90	76.5763	210.14
2	90	76.5763	213.85
2	90	76.5763	219.1
2	90	76.5763	238.08
2	90	76.5763	243.08
2	90	76.5763	248.31
2	90	76.5763	257.3
2	90	76.5763	262.72
2	90	76.5763	264.31
2	90	76.5763	268.97
2	90	76.5763	269.2
2	90	76.5763	273.43
2	90	76.5763	275.93
2	90	76.5763	279.91
2	90	76.5763	283.68
2	90	76.5763	284.58
2	90	76.5763	286.25
2	90	76.5763	296.08
2	90	76.5763	297.26
2	90	76.5763	300.19
2	90	76.5763	304.22
2	90	76.5763	306.7
2	90	76.5763	308.16
2	90	76.5763	310.39
2	90	76.5763	311.63
2	90	76.5763	313.54
2	90	76.5763	315.31
2	90	76.5763	316.13
2	90	76.5763	320.76
2	90	76.5763	328.65
2	90	76.5763	330
2	90	76.5763	331.37
2	90	76.5763	338.11
2	90	76.5763	342.54
2	90	76.5763	349.51
2	90	76.5763	356.49
2	90	76.5763	361.73
2	90	76.5763	363.11
2	90	76.5763	363.53
2	90	76.5763	373.27
2	90	76.5763	377.44
2	90	76.5763	387.56
2	90	76.5763	387.9
2	90	76.5763	389.55
2	90	76.5763	393.99
2	90	76.5763	401.25
2	90	76.5763	405.03
2	90	90.3208	222.36
2	90	90.3208	223.91
2	90	90.3208	227.69
2	90	90.3208	230.5
2	90	90.3208	231.65
2	90	90.3208	232.32
2	90	90.3208	234.98
2	90	90.3208	238.32
2	90	90.3208	242.03
2	90	90.3208	243.72
2	90	90.3208	245.31
2	90	90.3208	261.02
2	90	90.3208	262.94
2	90	90.3208	265.89
2	90	90.3208	266.93
2	90	90.3208	273.58
2	90	90.3208	281.63
2	90	90.3208	285.69
2	90	90.3208	293.08
2	90	90.3208	308.89
2	90	90.3208	314.86
2	90	90.3208	315.53
2	90	90.3208	320.3
2	90	90.3208	321.06
2	90	90.3208	326.19
2	90	90.3208	327.57
2	90	90.3208	327.57
2	90	90.3208	340.91
2	90	90.3208	344.88
2	90	90.3208	349.05
2	90	104.065	205.45
2	90	104.065	208.6
2	90	104.065	212.54
2	90	104.065	217.87
2	90	104.065	218.08
2	90	104.065	220.59
2	90	104.065	220.59
2	90	104.065	221.62
2	90	104.065	224.43
2	90	104.065	226.87
2	90	104.065	227.62
2	90	104.065	238.87
2	90	104.065	242
2	90	104.065	242.7
2	90	104.065	260.28
2	90	104.065	306.96
2	90	104.065	310.7
2	90	104.065	310.86
2	90	104.065	323.55
2	90	104.065	328.04
2	90	104.065	329.46
2	90	104.065	332.53
2	90	104.065	337.04
2	90	104.065	337.04
2	90	104.065	338.72
2	90	104.065	343.21
2	90	104.065	348.85
2	90	104.065	350.79
2	90	104.065	370.63
2	90	104.065	396.29
2	90	104.065	408.57
2	90	104.065	418.57
2	90	104.065	426.2
2	90	104.065	428.07
2	90	104.065	434.98
2	90	104.065	435.19
2	90	117.81	204.75
2	90	117.81	205.86
2	90	117.81	218.67
2	90	117.81	234.88
2	90	117.81	239.84
2	90	117.81	240.57
2	90	117.81	249.77
2	90	117.81	251.08
2	90	117.81	260.3
2	90	117.81	260.3
2	90	117.81	262.81
2	90	117.81	264.3
2	90	117.81	264.31
2	90	117.81	267.27
2	90	117.81	268.97
2	90	117.81	271.76
2	90	117.81	274.39
2	90	117.81	275.93
2	90	117.81	280.13
2	90	117.81	282.25
2	90	117.81	291.29
2	90	117.81	292.5
2	90	117.81	296.08
2	90	117.81	297.26
2	90	117.81	299.51
2	90	117.81	304.22
2	90	117.81	308.16
2	90	117.81	310.39
2	90	117.81	313.54
2	90	117.81	316.13
2	90	117.81	320.76
2	90	117.81	325.12
2	90	117.81	330
2	90	117.81	342.54
2	90	117.81	349.51
2	90	117.81	356.49
2	90	117.81	360.96
2	90	117.81	363.11
2	90	117.81	365.39
2	90	117.81	369.54
2	90	117.81	373.27
2	90	117.81	387.56
2	90	117.81	387.9
2	90	117.81	389.55
2	90	117.81	390.48
2	90	117.81	393.99
2	90	117.81	394.71
2	90	117.81	396.82
2	90	117.81	401.25
2	90	117.81	404.31
2	90	117.81	405.03
2	90	117.81	427.7
2	90	117.81	427.7
2	90	117.81	430.89
2	90	117.81	440.62
2	90	117.81	452.2
2	90	117.81	456.11
2	90	117.81	459.59
2	90	117.81	480.49
2	90	117.81	494.43
2.5	90	62.8319	216.99
2.5	90	62.8319	220.43
2.5	90	62.8319	231.5
2.5	90	62.8319	239.96
2.5	90	62.8319	242.48
2.5	90	62.8319	245.08
2.5	90	62.8319	245.3
2.5	90	62.8319	247.87
2.5	90	62.8319	249.64
2.5	90	62.8319	250.3
2.5	90	62.8319	254.16
2.5	90	62.8319	256.78
2.5	90	62.8319	259.57
2.5	90	62.8319	264.34
2.5	90	62.8319	264.96
2.5	90	62.8319	266.91
2.5	90	62.8319	271.22
2.5	90	62.8319	272.37
2.5	90	62.8319	276.3
2.5	90	62.8319	287.17
2.5	90	62.8319	287.86
2.5	90	62.8319	288.94
2.5	90	62.8319	292.02
2.5	90	62.8319	299.89
2.5	90	62.8319	314.55
2.5	90	62.8319	315.37
2.5	90	62.8319	331.4
2.5	90	62.8319	331.42
2.5	90	62.8319	335.36
2.5	90	62.8319	336.67
2.5	90	62.8319	336.99
2.5	90	62.8319	337.23
2.5	90	62.8319	339.64
2.5	90	62.8319	347.83
2.5	90	62.8319	348.02
2.5	90	62.8319	348.99
2.5	90	62.8319	348.99
2.5	90	62.8319	351.72
2.5	90	62.8319	358.01
2.5	90	62.8319	358.74
2.5	90	62.8319	359.01
2.5	90	62.8319	360.87
2.5	90	62.8319	361.72
2.5	90	62.8319	365.49
2.5	90	62.8319	366.5
2.5	90	62.8319	368.49
2.5	90	62.8319	373.2
2.5	90	62.8319	376.94
2.5	90	62.8319	378.7
2.5	90	62.8319	380.56
2.5	90	62.8319	380.99
2.5	90	62.8319	385.01
2.5	90	62.8319	385.22
2.5	90	62.8319	387.1
2.5	90	62.8319	388.44
2.5	90	62.8319	389.81
2.5	90	62.8319	390.38
2.5	90	62.8319	394.36
2.5	90	62.8319	403.15
2.5	90	62.8319	407.69
2.5	90	76.5763	183.19
2.5	90	76.5763	199.84
2.5	90	76.5763	206.13
2.5	90	76.5763	215.88
2.5	90	76.5763	219.29
2.5	90	76.5763	220.02
2.5	90	76.5763	220.22
2.5	90	76.5763	220.95
2.5	90	76.5763	221.27
2.5	90	76.5763	221.92
2.5	90	76.5763	222.93
2.5	90	76.5763	222.99
2.5	90	76.5763	223.8
2.5	90	76.5763	226.58
2.5	90	76.5763	227.38
2.5	90	76.5763	231.02
2.5	90	76.5763	235.26
2.5	90	76.5763	237.45
2.5	90	76.5763	239.35
2.5	90	76.5763	242.12
2.5	90	76.5763	243.86
2.5	90	76.5763	245.6
2.5	90	76.5763	249.38
2.5	90	76.5763	249.88
2.5	90	76.5763	251.19
2.5	90	76.5763	255.86
2.5	90	76.5763	256.06
2.5	90	76.5763	258.2
2.5	90	76.5763	258.58
2.5	90	76.5763	260.15
2.5	90	76.5763	262.77
2.5	90	76.5763	264.05
2.5	90	76.5763	264.07
2.5	90	76.5763	264.37
2.5	90	76.5763	266.42
2.5	90	76.5763	266.66
2.5	90	76.5763	268.68
2.5	90	76.5763	268.78
2.5	90	76.5763	270.47
2.5	90	76.5763	271.37
2.5	90	76.5763	274.73
2.5	90	76.5763	279.39
2.5	90	76.5763	279.64
2.5	90	76.5763	280.53
2.5	90	76.5763	281.13
2.5	90	76.5763	283.14
2.5	90	76.5763	289.89
2.5	90	76.5763	294.34
2.5	90	76.5763	297.94
2.5	90	76.5763	299.81
2.5	90	76.5763	299.88
2.5	90	76.5763	299.92
2.5	90	76.5763	300.16
2.5	90	76.5763	310.75
2.5	90	76.5763	318.48
2.5	90	76.5763	320.59
2.5	90	76.5763	336.54
2.5	90	76.5763	357.95
2.5	90	76.5763	379.1
2.5	90	76.5763	382.94
2.5	90	90.3208	306.14
2.5	90	90.3208	324.67
2.5	90	90.3208	324.67
2.5	90	90.3208	326.74
2.5	90	90.3208	329.73
2.5	90	90.3208	330.45
2.5	90	90.3208	333
2.5	90	90.3208	336.05
2.5	90	90.3208	336.11
2.5	90	90.3208	336.28
2.5	90	90.3208	337.57
2.5	90	90.3208	338.03
2.5	90	90.3208	342.52
2.5	90	90.3208	343.12
2.5	90	90.3208	343.3
2.5	90	90.3208	343.87
2.5	90	90.3208	347.59
2.5	90	90.3208	350.8
2.5	90	90.3208	351.16
2.5	90	90.3208	351.21
2.5	90	90.3208	351.35
2.5	90	90.3208	352.04
2.5	90	90.3208	354.16
2.5	90	90.3208	354.89
2.5	90	90.3208	356.15
2.5	90	90.3208	358.15
2.5	90	90.3208	361.55
2.5	90	90.3208	364.88
2.5	90	90.3208	365.14
2.5	90	90.3208	366.63
2.5	90	90.3208	367.39
2.5	90	90.3208	369.04
2.5	90	90.3208	370.36
2.5	90	90.3208	370.53
2.5	90	90.3208	374.15
2.5	90	90.3208	376.85
2.5	90	90.3208	379.59
2.5	90	90.3208	385.14
2.5	90	90.3208	387.9
2.5	90	90.3208	404.32
2.5	90	90.3208	414.55
2.5	90	90.3208	414.93
2.5	90	90.3208	415.51
2.5	90	90.3208	420.45
2.5	90	90.3208	422.08
2.5	90	90.3208	422.08
2.5	90	90.3208	423.79
2.5	90	90.3208	429.67
2.5	90	90.3208	435.65
2.5	90	90.3208	439.64
2.5	90	90.3208	444.81
2.5	90	90.3208	447.59
2.5	90	90.3208	448.28
2.5	90	90.3208	449.59
2.5	90	90.3208	453.98
2.5	90	90.3208	455.68
2.5	90	90.3208	456.55
2.5	90	90.3208	458.45
2.5	90	90.3208	460.62
2.5	90	90.3208	473.75
2.5	90	104.065	408.16
2.5	90	104.065	426.31
2.5	90	104.065	431.8
2.5	90	104.065	433.16
2.5	90	104.065	434.52
2.5	90	104.065	438.82
2.5	90	104.065	445.59
2.5	90	104.065	447.74
2.5	90	104.065	452.75
2.5	90	104.065	452.87
2.5	90	104.065	454.82
2.5	90	104.065	455.44
2.5	90	104.065	455.93
2.5	90	104.065	459.86
2.5	90	104.065	461.5
2.5	90	104.065	462.31
2.5	90	104.065	470.28
2.5	90	104.065	470.38
2.5	90	104.065	474.01
2.5	90	104.065	478.14
2.5	90	104.065	478.53
2.5	90	104.065	484.24
2.5	90	104.065	486.97
2.5	90	104.065	487.86
2.5	90	117.81	356.08
2.5	90	117.81	373.73
2.5	90	117.81	388.83
2.5	90	117.81	389.27
2.5	90	117.81	390.3
2.5	90	117.81	395.98
2.5	90	117.81	396.89
2.5	90	117.81	397.46
2.5	90	117.81	401.04
2.5	90	117.81	404.99
2.5	90	117.81	408.81
2.5	90	117.81	412.42
2.5	90	117.81	414.32
2.5	90	117.81	415.77
2.5	90	117.81	423.01
2.5	90	117.81	424.18
2.5	90	117.81	425.83
2.5	90	117.81	427.27
2.5	90	117.81	427.27
2.5	90	117.81	430.49
2.5	90	117.81	430.53
2.5	90	117.81	433.09
2.5	90	117.81	433.43
2.5	90	117.81	433.65
2.5	90	117.81	437.14
2.5	90	117.81	448.55
2.5	90	117.81	449.94
2.5	90	117.81	461.56
2.5	90	117.81	469.63
2.5	90	117.81	470.19
2.5	90	117.81	470.94
2.5	90	117.81	473.53
2.5	90	117.81	482.55
2.5	90	117.81	483.99
2.5	90	117.81	487.55
2.5	90	117.81	489.99
2.5	90	117.81	489.99
2.5	90	117.81	492.88
2.5	90	117.81	493.88
2.5	90	117.81	496.78
2.5	90	117.81	499.68
2.5	90	117.81	500.22
2.5	90	117.81	502.49
2.5	90	117.81	502.84
2.5	90	117.81	504.37
2.5	90	117.81	507.88
2.5	90	117.81	510.88
2.5	90	117.81	511.26
2.5	90	117.81	514.27
2.5	90	117.81	518.12
2.5	90	117.81	518.74
2.5	90	117.81	519.25
2.5	90	117.81	520.99
2.5	90	117.81	521.01
2.5	90	117.81	521.55
2.5	90	117.81	525.68
3	90	62.8319	149.93
3	90	62.8319	166.12
3	90	62.8319	179.88
3	90	62.8319	186.57
3	90	62.8319	204.65
3	90	62.8319	208.39
3	90	62.8319	208.39
3	90	62.8319	211.88
3	90	62.8319	212.97
3	90	62.8319	215.71
3	90	62.8319	224.47
3	90	62.8319	224.81
3	90	62.8319	225.76
3	90	62.8319	232.4
3	90	62.8319	238.95
3	90	62.8319	241.46
3	90	62.8319	242.28
3	90	62.8319	244.12
3	90	62.8319	249.35
3	90	62.8319	252.75
3	90	62.8319	256.99
3	90	62.8319	259.67
3	90	62.8319	259.83
3	90	62.8319	259.91
3	90	62.8319	265.23
3	90	62.8319	265.89
3	90	62.8319	267.13
3	90	62.8319	267.13
3	90	62.8319	269.91
3	90	62.8319	269.94
3	90	62.8319	272.38
3	90	62.8319	273.53
3	90	62.8319	274.05
3	90	62.8319	276.57
3	90	62.8319	283.83
3	90	62.8319	286.35
3	90	62.8319	299.95
3	90	62.8319	301.61
3	90	62.8319	302.99
3	90	62.8319	304.04
3	90	62.8319	305.63
3	90	62.8319	311.37
3	90	62.8319	312.31
3	90	62.8319	316.91
3	90	62.8319	321.21
3	90	62.8319	322.18
3	90	62.8319	326.62
3	90	62.8319	330.52
3	90	62.8319	343.53
3	90	62.8319	349.82
3	90	62.8319	349.82
3	90	62.8319	357.18
3	90	62.8319	358.74
3	90	62.8319	362.43
3	90	62.8319	363.54
3	90	62.8319	366.57
3	90	62.8319	373.23
3	90	62.8319	373.68
3	90	62.8319	386.63
3	90	62.8319	392.92
3	90	76.5763	215.76
3	90	76.5763	236.64
3	90	76.5763	237.9
3	90	76.5763	245.79
3	90	76.5763	254.38
3	90	76.5763	254.96
3	90	76.5763	257.16
3	90	76.5763	261.47
3	90	76.5763	272.84
3	90	76.5763	315.93
3	90	76.5763	331.12
3	90	76.5763	349.28
3	90	90.3208	188.2
3	90	90.3208	190.83
3	90	90.3208	198.26
3	90	90.3208	198.38
3	90	90.3208	201.92
3	90	90.3208	201.92
3	90	90.3208	210.27
3	90	90.3208	211.1
3	90	90.3208	214
3	90	90.3208	216.72
3	90	90.3208	223.03
3	90	90.3208	224.91
3	90	90.3208	227.97
3	90	90.3208	230.67
3	90	90.3208	232.21
3	90	90.3208	232.21
3	90	90.3208	235.07
3	90	90.3208	236.87
3	90	90.3208	237.73
3	90	90.3208	238.82
3	90	90.3208	240.63
3	90	90.3208	242.75
3	90	90.3208	243.27
3	90	90.3208	246
3	90	90.3208	247.81
3	90	90.3208	247.97
3	90	90.3208	248.56
3	90	90.3208	253.42
3	90	90.3208	254.42
3	90	90.3208	255.12
3	90	90.3208	258.17
3	90	90.3208	260.88
3	90	90.3208	264.19
3	90	90.3208	265.69
3	90	90.3208	266.46
3	90	90.3208	271.09
3	90	90.3208	271.76
3	90	90.3208	278.67
3	90	90.3208	279.97
3	90	90.3208	283.33
3	90	90.3208	287.71
3	90	90.3208	290.38
3	90	90.3208	297.67
3	90	90.3208	297.85
3	90	90.3208	298.66
3	90	90.3208	317.52
3	90	90.3208	318.68
3	90	90.3208	324.18
3	90	90.3208	324.76
3	90	90.3208	327.71
3	90	90.3208	329.27
3	90	90.3208	337.96
3	90	90.3208	343.74
3	90	90.3208	351.9
3	90	90.3208	352.21
3	90	90.3208	366.38
3	90	90.3208	369.12
3	90	90.3208	374.5
3	90	90.3208	389.93
3	90	90.3208	400.86
3	90	104.065	307.17
3	90	104.065	307.91
3	90	104.065	315.03
3	90	104.065	317.21
3	90	104.065	326.5
3	90	104.065	327.18
3	90	104.065	330.04
3	90	104.065	332.59
3	90	104.065	333.75
3	90	104.065	334.31
3	90	104.065	335.41
3	90	104.065	341.51
3	90	104.065	343.6
3	90	104.065	343.74
3	90	104.065	347.26
3	90	104.065	351.21
3	90	104.065	351.46
3	90	104.065	352.36
3	90	104.065	353.9
3	90	104.065	354.33
3	90	104.065	354.84
3	90	104.065	355.2
3	90	104.065	355.8
3	90	104.065	360.74
3	90	104.065	361.4
3	90	104.065	361.43
3	90	104.065	365.5
3	90	104.065	371.54
3	90	104.065	372.81
3	90	104.065	381.96
3	90	104.065	385.05
3	90	104.065	388.79
3	90	104.065	388.87
3	90	104.065	389.93
3	90	104.065	391.27
3	90	104.065	399.39
3	90	104.065	407.9
3	90	104.065	409.04
3	90	104.065	421.83
3	90	104.065	425.21
3	90	104.065	438.49
3	90	104.065	439.45
3	90	104.065	442.34
3	90	104.065	445.19
3	90	104.065	449.1
3	90	104.065	457.09
3	90	104.065	459
3	90	104.065	459.33
3	90	104.065	467.14
3	90	104.065	469.07
3	90	104.065	470.71
3	90	117.81	205.08
3	90	117.81	212.85
3	90	117.81	213.12
3	90	117.81	221.26
3	90	117.81	224.92
3	90	117.81	236.15
3	90	117.81	237.3
3	90	117.81	243.13
3	90	117.81	243.15
3	90	117.81	245.74
3	90	117.81	245.92
3	90	117.81	246.42
3	90	117.81	249.18
3	90	117.81	249.78
3	90	117.81	251.42
3	90	117.81	251.9
3	90	117.81	254.98
3	90	117.81	257.15
3	90	117.81	258.94
3	90	117.81	259.76
3	90	117.81	260.22
3	90	117.81	261.2
3	90	117.81	262.27
3	90	117.81	263.09
3	90	117.81	264.74
3	90	117.81	266.2
3	90	117.81	266.71
3	90	117.81	269.4
3	90	117.81	272.86
3	90	117.81	274.72
3	90	117.81	276.57
3	90	117.81	276.78
3	90	117.81	276.81
3	90	117.81	277.91
3	90	117.81	279.36
3	90	117.81	283.02
3	90	117.81	283.02
3	90	117.81	285.77
3	90	117.81	289.93
3	90	117.81	291.37
3	90	117.81	293.63
3	90	117.81	297.07
3	90	117.81	301.86
3	90	117.81	302.18
3	90	117.81	302.62
3	90	117.81	304.62
3	90	117.81	306.14
3	90	117.81	306.41
3	90	117.81	306.61
3	90	117.81	310.19
3	90	117.81	313.09
3	90	117.81	317.61
3	90	117.81	318.44
3	90	117.81	329.79
3	90	117.81	338.96
3	90	117.81	349.22
3	90	117.81	356.01
3	90	117.81	356.43
3	90	117.81	363.29
3	90	117.81	385.52

## Sheet: Supplemental Table 6
Sample Number	Normal effective stress (MPa)	Shear displacement (°)	Casting thin section number	Sampling Point No.	Grain size(μm)
Uc3 Db3	1.5Mpa	90°	2	1	174.35
Uc3 Db3	1.5Mpa	90°	2	2	137.24
Uc3 Db3	1.5Mpa	90°	2	3	163.97
Uc3 Db3	1.5Mpa	90°	2	4	148.08
Uc3 Db3	1.5Mpa	90°	2	5	123.72
Uc3 Db3	1.5Mpa	90°	2	6	212.28
Uc3 Db3	1.5Mpa	90°	2	7	111.61
Uc3 Db3	1.5Mpa	90°	2	8	109.07
Uc3 Db3	1.5Mpa	90°	2	9	120.06
Uc3 Db3	1.5Mpa	90°	2	10	192.99
Uc3 Db3	1.5Mpa	90°	2	11	158.68
Uc3 Db3	1.5Mpa	90°	2	12	82.36
Uc3 Db3	1.5Mpa	90°	2	13	135.46
Uc3 Db3	1.5Mpa	90°	2	14	116.74
Uc3 Db3	1.5Mpa	90°	2	15	179.14
Uc3 Db3	1.5Mpa	90°	2	16	2.05
Uc3 Db3	1.5Mpa	90°	2	17	2.05
Uc3 Db3	1.5Mpa	90°	2	18	2.05
Uc3 Db3	1.5Mpa	90°	2	19	2.05
Uc3 Db3	1.5Mpa	90°	2	20	2.05
Uc3 Db3	1.5Mpa	90°	2	21	8.2
Uc3 Db3	1.5Mpa	90°	2	22	4.1
Uc3 Db3	1.5Mpa	90°	2	23	2.05
Uc3 Db3	1.5Mpa	90°	2	24	6.15
Uc3 Db3	1.5Mpa	90°	2	25	2.05
Uc3 Db3	1.5Mpa	90°	2	26	8.45
Uc3 Db3	1.5Mpa	90°	2	27	4.1
Uc3 Db3	1.5Mpa	90°	2	28	4.59
Uc3 Db3	1.5Mpa	90°	2	29	8.2
Uc3 Db3	1.5Mpa	90°	2	30	6.48
Uc3 Db3	1.5Mpa	90°	2	31	65.65
Uc3 Db3	1.5Mpa	90°	2	32	35.1
Uc3 Db3	1.5Mpa	90°	2	33	30.76
Uc3 Db3	1.5Mpa	90°	2	34	32.87
Uc3 Db3	1.5Mpa	90°	2	35	32.87
Uc3 Db3	1.5Mpa	90°	2	36	55.4
Uc3 Db3	1.5Mpa	90°	2	37	36.97
Uc3 Db3	1.5Mpa	90°	2	38	43.06
Uc3 Db3	1.5Mpa	90°	2	39	49.21
Uc3 Db3	1.5Mpa	90°	2	40	41.06
Uc3 Db3	1.5Mpa	90°	2	41	37.14
Uc3 Db3	1.5Mpa	90°	2	42	41.22
Uc3 Db3	1.5Mpa	90°	2	43	45.3
Uc3 Db3	1.5Mpa	90°	2	44	53.67
Uc3 Db3	1.5Mpa	90°	2	45	45.11
Uc3 Db3	1.5Mpa	90°	2	46	165.09
Uc3 Db3	1.5Mpa	90°	2	47	171.85
Uc3 Db3	1.5Mpa	90°	2	48	188.93
Uc3 Db3	1.5Mpa	90°	2	49	134.86
Uc3 Db3	1.5Mpa	90°	2	50	180.52
Uc3 Db3	1.5Mpa	90°	2	51	188.93
Uc3 Db3	1.5Mpa	90°	2	52	115.38
Uc3 Db3	1.5Mpa	90°	2	53	135.4
Uc3 Db3	1.5Mpa	90°	2	54	139.58
Uc3 Db3	1.5Mpa	90°	2	55	107.42
Uc3 Db3	1.5Mpa	90°	2	56	131.74
Uc3 Db3	1.5Mpa	90°	2	57	176.18
Uc3 Db3	1.5Mpa	90°	2	58	194.22
Uc3 Db3	1.5Mpa	90°	2	59	143.67
Uc3 Db3	1.5Mpa	90°	2	60	120.45
Ud2 Dc2	1.5Mpa	90°	2	1	225.64
Ud2 Dc2	1.5Mpa	90°	2	2	221.84
Ud2 Dc2	1.5Mpa	90°	2	3	142.7
Ud2 Dc2	1.5Mpa	90°	2	4	181.64
Ud2 Dc2	1.5Mpa	90°	2	5	158.4
Ud2 Dc2	1.5Mpa	90°	2	6	103.4
Ud2 Dc2	1.5Mpa	90°	2	7	189.09
Ud2 Dc2	1.5Mpa	90°	2	8	243.3
Ud2 Dc2	1.5Mpa	90°	2	9	215.57
Ud2 Dc2	1.5Mpa	90°	2	10	259.23
Ud2 Dc2	1.5Mpa	90°	2	11	122.28
Ud2 Dc2	1.5Mpa	90°	2	12	232.11
Ud2 Dc2	1.5Mpa	90°	2	13	132.07
Ud2 Dc2	1.5Mpa	90°	2	14	117.8
Ud2 Dc2	1.5Mpa	90°	2	15	261.85
Ud2 Dc2	1.5Mpa	90°	2	16	3.58
Ud2 Dc2	1.5Mpa	90°	2	17	8.01
Ud2 Dc2	1.5Mpa	90°	2	18	2.53
Ud2 Dc2	1.5Mpa	90°	2	19	5.06
Ud2 Dc2	1.5Mpa	90°	2	20	8.01
Ud2 Dc2	1.5Mpa	90°	2	21	5.06
Ud2 Dc2	1.5Mpa	90°	2	22	2.53
Ud2 Dc2	1.5Mpa	90°	2	23	5.66
Ud2 Dc2	1.5Mpa	90°	2	24	7.59
Ud2 Dc2	1.5Mpa	90°	2	25	2.53
Ud2 Dc2	1.5Mpa	90°	2	26	5.06
Ud2 Dc2	1.5Mpa	90°	2	27	5.07
Ud2 Dc2	1.5Mpa	90°	2	28	2.53
Ud2 Dc2	1.5Mpa	90°	2	29	2.53
Ud2 Dc2	1.5Mpa	90°	2	30	3.58
Ud2 Dc2	1.5Mpa	90°	2	31	55.77
Ud2 Dc2	1.5Mpa	90°	2	32	63.31
Ud2 Dc2	1.5Mpa	90°	2	33	40.05
Ud2 Dc2	1.5Mpa	90°	2	34	50.66
Ud2 Dc2	1.5Mpa	90°	2	35	43.58
Ud2 Dc2	1.5Mpa	90°	2	36	62.71
Ud2 Dc2	1.5Mpa	90°	2	37	73.96
Ud2 Dc2	1.5Mpa	90°	2	38	50.28
Ud2 Dc2	1.5Mpa	90°	2	39	44.81
Ud2 Dc2	1.5Mpa	90°	2	40	42.98
Ud2 Dc2	1.5Mpa	90°	2	41	46.7
Ud2 Dc2	1.5Mpa	90°	2	42	52.69
Ud2 Dc2	1.5Mpa	90°	2	43	52.22
Ud2 Dc2	1.5Mpa	90°	2	44	46.56
Ud2 Dc2	1.5Mpa	90°	2	45	50.66
Ud2 Dc2	1.5Mpa	90°	2	46	145.01
Ud2 Dc2	1.5Mpa	90°	2	47	249.37
Ud2 Dc2	1.5Mpa	90°	2	48	231.14
Ud2 Dc2	1.5Mpa	90°	2	49	198.72
Ud2 Dc2	1.5Mpa	90°	2	50	236.14
Ud2 Dc2	1.5Mpa	90°	2	51	144.34
Ud2 Dc2	1.5Mpa	90°	2	52	215.67
Ud2 Dc2	1.5Mpa	90°	2	53	247.33
Ud2 Dc2	1.5Mpa	90°	2	54	103.36
Ud2 Dc2	1.5Mpa	90°	2	55	98.87
Ud2 Dc2	1.5Mpa	90°	2	56	212.24
Ud2 Dc2	1.5Mpa	90°	2	57	154.51
Ud2 Dc2	1.5Mpa	90°	2	58	170.91
Ud2 Dc2	1.5Mpa	90°	2	59	117.8
Ud2 Dc2	1.5Mpa	90°	2	60	92.89
Uc3 Db3	1.5Mpa	90°	3	1	185.1
Uc3 Db3	1.5Mpa	90°	3	2	135.39
Uc3 Db3	1.5Mpa	90°	3	3	138.17
Uc3 Db3	1.5Mpa	90°	3	4	164.6
Uc3 Db3	1.5Mpa	90°	3	5	270.58
Uc3 Db3	1.5Mpa	90°	3	6	174.96
Uc3 Db3	1.5Mpa	90°	3	7	121.91
Uc3 Db3	1.5Mpa	90°	3	8	238.57
Uc3 Db3	1.5Mpa	90°	3	9	173.88
Uc3 Db3	1.5Mpa	90°	3	10	140.5
Uc3 Db3	1.5Mpa	90°	3	11	178.89
Uc3 Db3	1.5Mpa	90°	3	12	119.88
Uc3 Db3	1.5Mpa	90°	3	13	163.25
Uc3 Db3	1.5Mpa	90°	3	14	131.8
Uc3 Db3	1.5Mpa	90°	3	15	121.97
Uc3 Db3	1.5Mpa	90°	3	16	8.45
Uc3 Db3	1.5Mpa	90°	3	17	9.45
Uc3 Db3	1.5Mpa	90°	3	18	2.99
Uc3 Db3	1.5Mpa	90°	3	19	4.22
Uc3 Db3	1.5Mpa	90°	3	20	6.68
Uc3 Db3	1.5Mpa	90°	3	21	4.22
Uc3 Db3	1.5Mpa	90°	3	22	4.22
Uc3 Db3	1.5Mpa	90°	3	23	2.99
Uc3 Db3	1.5Mpa	90°	3	24	2.99
Uc3 Db3	1.5Mpa	90°	3	25	2.99
Uc3 Db3	1.5Mpa	90°	3	26	5.97
Uc3 Db3	1.5Mpa	90°	3	27	5.97
Uc3 Db3	1.5Mpa	90°	3	28	5.97
Uc3 Db3	1.5Mpa	90°	3	29	5.97
Uc3 Db3	1.5Mpa	90°	3	30	5.97
Uc3 Db3	1.5Mpa	90°	3	31	53.92
Uc3 Db3	1.5Mpa	90°	3	32	47.97
Uc3 Db3	1.5Mpa	90°	3	33	44
Uc3 Db3	1.5Mpa	90°	3	34	32.12
Uc3 Db3	1.5Mpa	90°	3	35	45.81
Uc3 Db3	1.5Mpa	90°	3	36	47.8
Uc3 Db3	1.5Mpa	90°	3	37	44
Uc3 Db3	1.5Mpa	90°	3	38	52.73
Uc3 Db3	1.5Mpa	90°	3	39	51.2
Uc3 Db3	1.5Mpa	90°	3	40	50.42
Uc3 Db3	1.5Mpa	90°	3	41	44.09
Uc3 Db3	1.5Mpa	90°	3	42	40.03
Uc3 Db3	1.5Mpa	90°	3	43	32.12
Uc3 Db3	1.5Mpa	90°	3	44	44.53
Uc3 Db3	1.5Mpa	90°	3	45	53.78
Uc3 Db3	1.5Mpa	90°	3	46	95
Uc3 Db3	1.5Mpa	90°	3	47	207.58
Uc3 Db3	1.5Mpa	90°	3	48	237.21
Uc3 Db3	1.5Mpa	90°	3	49	211.7
Uc3 Db3	1.5Mpa	90°	3	50	266.35
Uc3 Db3	1.5Mpa	90°	3	51	139.2
Uc3 Db3	1.5Mpa	90°	3	52	110.42
Uc3 Db3	1.5Mpa	90°	3	53	237.57
Uc3 Db3	1.5Mpa	90°	3	54	145.99
Uc3 Db3	1.5Mpa	90°	3	55	163.07
Uc3 Db3	1.5Mpa	90°	3	56	154.29
Uc3 Db3	1.5Mpa	90°	3	57	102.52
Uc3 Db3	1.5Mpa	90°	3	58	88.36
Uc3 Db3	1.5Mpa	90°	3	59	169.96
Uc3 Db3	1.5Mpa	90°	3	60	258.75
Ud2 Dc2	1.5Mpa	90°	3	1	169.54
Ud2 Dc2	1.5Mpa	90°	3	2	153.5
Ud2 Dc2	1.5Mpa	90°	3	3	142.22
Ud2 Dc2	1.5Mpa	90°	3	4	166.92
Ud2 Dc2	1.5Mpa	90°	3	5	166.37
Ud2 Dc2	1.5Mpa	90°	3	6	127.77
Ud2 Dc2	1.5Mpa	90°	3	7	168.11
Ud2 Dc2	1.5Mpa	90°	3	8	218.07
Ud2 Dc2	1.5Mpa	90°	3	9	225.44
Ud2 Dc2	1.5Mpa	90°	3	10	226.43
Ud2 Dc2	1.5Mpa	90°	3	11	129.2
Ud2 Dc2	1.5Mpa	90°	3	12	160.21
Ud2 Dc2	1.5Mpa	90°	3	13	151.56
Ud2 Dc2	1.5Mpa	90°	3	14	218.04
Ud2 Dc2	1.5Mpa	90°	3	15	231.15
Ud2 Dc2	1.5Mpa	90°	3	16	4.52
Ud2 Dc2	1.5Mpa	90°	3	17	4.04
Ud2 Dc2	1.5Mpa	90°	3	18	2.02
Ud2 Dc2	1.5Mpa	90°	3	19	2.86
Ud2 Dc2	1.5Mpa	90°	3	20	6.39
Ud2 Dc2	1.5Mpa	90°	3	21	4.52
Ud2 Dc2	1.5Mpa	90°	3	22	2.02
Ud2 Dc2	1.5Mpa	90°	3	23	2.86
Ud2 Dc2	1.5Mpa	90°	3	24	4.52
Ud2 Dc2	1.5Mpa	90°	3	25	7.29
Ud2 Dc2	1.5Mpa	90°	3	26	6.06
Ud2 Dc2	1.5Mpa	90°	3	27	2.86
Ud2 Dc2	1.5Mpa	90°	3	28	2.02
Ud2 Dc2	1.5Mpa	90°	3	29	5.72
Ud2 Dc2	1.5Mpa	90°	3	30	4.52
Ud2 Dc2	1.5Mpa	90°	3	31	45.43
Ud2 Dc2	1.5Mpa	90°	3	32	40.64
Ud2 Dc2	1.5Mpa	90°	3	33	36.89
Ud2 Dc2	1.5Mpa	90°	3	34	44.16
Ud2 Dc2	1.5Mpa	90°	3	35	42.21
Ud2 Dc2	1.5Mpa	90°	3	36	51.19
Ud2 Dc2	1.5Mpa	90°	3	37	45.61
Ud2 Dc2	1.5Mpa	90°	3	38	53.95
Ud2 Dc2	1.5Mpa	90°	3	39	41.68
Ud2 Dc2	1.5Mpa	90°	3	40	35.31
Ud2 Dc2	1.5Mpa	90°	3	41	45.61
Ud2 Dc2	1.5Mpa	90°	3	42	64.73
Ud2 Dc2	1.5Mpa	90°	3	43	41.24
Ud2 Dc2	1.5Mpa	90°	3	44	43.64
Ud2 Dc2	1.5Mpa	90°	3	45	58.87
Ud2 Dc2	1.5Mpa	90°	3	46	145.78
Ud2 Dc2	1.5Mpa	90°	3	47	181.33
Ud2 Dc2	1.5Mpa	90°	3	48	164.19
Ud2 Dc2	1.5Mpa	90°	3	49	157.69
Ud2 Dc2	1.5Mpa	90°	3	50	174.29
Ud2 Dc2	1.5Mpa	90°	3	51	235.51
Ud2 Dc2	1.5Mpa	90°	3	52	302.4
Ud2 Dc2	1.5Mpa	90°	3	53	188.23
Ud2 Dc2	1.5Mpa	90°	3	54	258.94
Ud2 Dc2	1.5Mpa	90°	3	55	134.42
Ud2 Dc2	1.5Mpa	90°	3	56	143.41
Ud2 Dc2	1.5Mpa	90°	3	57	146.69
Ud2 Dc2	1.5Mpa	90°	3	58	169.1
Ud2 Dc2	1.5Mpa	90°	3	59	161.12
Ud2 Dc2	1.5Mpa	90°	3	60	215.11
Uc3 Db3	1.5Mpa	90°	4	1	221.22
Uc3 Db3	1.5Mpa	90°	4	2	232.38
Uc3 Db3	1.5Mpa	90°	4	3	175.43
Uc3 Db3	1.5Mpa	90°	4	4	153.56
Uc3 Db3	1.5Mpa	90°	4	5	183.58
Uc3 Db3	1.5Mpa	90°	4	6	180.38
Uc3 Db3	1.5Mpa	90°	4	7	153.46
Uc3 Db3	1.5Mpa	90°	4	8	242.8
Uc3 Db3	1.5Mpa	90°	4	9	260.09
Uc3 Db3	1.5Mpa	90°	4	10	138.53
Uc3 Db3	1.5Mpa	90°	4	11	137.68
Uc3 Db3	1.5Mpa	90°	4	12	123.31
Uc3 Db3	1.5Mpa	90°	4	13	112.86
Uc3 Db3	1.5Mpa	90°	4	14	96.68
Uc3 Db3	1.5Mpa	90°	4	15	130.33
Uc3 Db3	1.5Mpa	90°	4	16	8.33
Uc3 Db3	1.5Mpa	90°	4	17	2.86
Uc3 Db3	1.5Mpa	90°	4	18	2.86
Uc3 Db3	1.5Mpa	90°	4	19	4.04
Uc3 Db3	1.5Mpa	90°	4	20	2.02
Uc3 Db3	1.5Mpa	90°	4	21	4.51
Uc3 Db3	1.5Mpa	90°	4	22	9.03
Uc3 Db3	1.5Mpa	90°	4	23	3.87
Uc3 Db3	1.5Mpa	90°	4	24	1.73
Uc3 Db3	1.5Mpa	90°	4	25	1.73
Uc3 Db3	1.5Mpa	90°	4	26	1.73
Uc3 Db3	1.5Mpa	90°	4	27	3.87
Uc3 Db3	1.5Mpa	90°	4	28	6.24
Uc3 Db3	1.5Mpa	90°	4	29	3.87
Uc3 Db3	1.5Mpa	90°	4	30	5.47
Uc3 Db3	1.5Mpa	90°	4	31	47.27
Uc3 Db3	1.5Mpa	90°	4	32	31.2
Uc3 Db3	1.5Mpa	90°	4	33	59.77
Uc3 Db3	1.5Mpa	90°	4	34	38.89
Uc3 Db3	1.5Mpa	90°	4	35	34.83
Uc3 Db3	1.5Mpa	90°	4	36	40.36
Uc3 Db3	1.5Mpa	90°	4	37	33.6
Uc3 Db3	1.5Mpa	90°	4	38	31.77
Uc3 Db3	1.5Mpa	90°	4	39	46.08
Uc3 Db3	1.5Mpa	90°	4	40	32.65
Uc3 Db3	1.5Mpa	90°	4	41	42.98
Uc3 Db3	1.5Mpa	90°	4	42	45.72
Uc3 Db3	1.5Mpa	90°	4	43	36.79
Uc3 Db3	1.5Mpa	90°	4	44	40.25
Uc3 Db3	1.5Mpa	90°	4	45	46.6
Uc3 Db3	1.5Mpa	90°	4	46	148.81
Uc3 Db3	1.5Mpa	90°	4	47	150.88
Uc3 Db3	1.5Mpa	90°	4	48	144.45
Uc3 Db3	1.5Mpa	90°	4	49	159.77
Uc3 Db3	1.5Mpa	90°	4	50	106.44
Uc3 Db3	1.5Mpa	90°	4	51	97.69
Uc3 Db3	1.5Mpa	90°	4	52	147.25
Uc3 Db3	1.5Mpa	90°	4	53	133.54
Uc3 Db3	1.5Mpa	90°	4	54	107.03
Uc3 Db3	1.5Mpa	90°	4	55	136.42
Uc3 Db3	1.5Mpa	90°	4	56	120.8
Uc3 Db3	1.5Mpa	90°	4	57	132.99
Uc3 Db3	1.5Mpa	90°	4	58	84.79
Uc3 Db3	1.5Mpa	90°	4	59	149.34
Uc3 Db3	1.5Mpa	90°	4	60	186.13
Ud2 Dc2	1.5Mpa	90°	4	1	187.63
Ud2 Dc2	1.5Mpa	90°	4	2	188.69
Ud2 Dc2	1.5Mpa	90°	4	3	133.86
Ud2 Dc2	1.5Mpa	90°	4	4	148.56
Ud2 Dc2	1.5Mpa	90°	4	5	211.28
Ud2 Dc2	1.5Mpa	90°	4	6	222.2
Ud2 Dc2	1.5Mpa	90°	4	7	124.25
Ud2 Dc2	1.5Mpa	90°	4	8	183.41
Ud2 Dc2	1.5Mpa	90°	4	9	139.2
Ud2 Dc2	1.5Mpa	90°	4	10	145.8
Ud2 Dc2	1.5Mpa	90°	4	11	267.17
Ud2 Dc2	1.5Mpa	90°	4	12	255.24
Ud2 Dc2	1.5Mpa	90°	4	13	150.67
Ud2 Dc2	1.5Mpa	90°	4	14	251.32
Ud2 Dc2	1.5Mpa	90°	4	15	185.16
Ud2 Dc2	1.5Mpa	90°	4	16	4.81
Ud2 Dc2	1.5Mpa	90°	4	17	2.15
Ud2 Dc2	1.5Mpa	90°	4	18	2.15
Ud2 Dc2	1.5Mpa	90°	4	19	7.76
Ud2 Dc2	1.5Mpa	90°	4	20	4.3
Ud2 Dc2	1.5Mpa	90°	4	21	2.15
Ud2 Dc2	1.5Mpa	90°	4	22	6.81
Ud2 Dc2	1.5Mpa	90°	4	23	4.81
Ud2 Dc2	1.5Mpa	90°	4	24	4.81
Ud2 Dc2	1.5Mpa	90°	4	25	4.3
Ud2 Dc2	1.5Mpa	90°	4	26	2.15
Ud2 Dc2	1.5Mpa	90°	4	27	3.04
Ud2 Dc2	1.5Mpa	90°	4	28	4.81
Ud2 Dc2	1.5Mpa	90°	4	29	13.09
Ud2 Dc2	1.5Mpa	90°	4	30	2.15
Ud2 Dc2	1.5Mpa	90°	4	31	53.82
Ud2 Dc2	1.5Mpa	90°	4	32	38.51
Ud2 Dc2	1.5Mpa	90°	4	33	43.59
Ud2 Dc2	1.5Mpa	90°	4	34	40.96
Ud2 Dc2	1.5Mpa	90°	4	35	54.47
Ud2 Dc2	1.5Mpa	90°	4	36	39.58
Ud2 Dc2	1.5Mpa	90°	4	37	72.18
Ud2 Dc2	1.5Mpa	90°	4	38	73.64
Ud2 Dc2	1.5Mpa	90°	4	39	49.1
Ud2 Dc2	1.5Mpa	90°	4	40	52.43
Ud2 Dc2	1.5Mpa	90°	4	41	51.76
Ud2 Dc2	1.5Mpa	90°	4	42	35.51
Ud2 Dc2	1.5Mpa	90°	4	43	61.27
Ud2 Dc2	1.5Mpa	90°	4	44	58.57
Ud2 Dc2	1.5Mpa	90°	4	45	43.91
Ud2 Dc2	1.5Mpa	90°	4	46	180.95
Ud2 Dc2	1.5Mpa	90°	4	47	229.89
Ud2 Dc2	1.5Mpa	90°	4	48	170.15
Ud2 Dc2	1.5Mpa	90°	4	49	172.01
Ud2 Dc2	1.5Mpa	90°	4	50	102.28
Ud2 Dc2	1.5Mpa	90°	4	51	210.96
Ud2 Dc2	1.5Mpa	90°	4	52	270.36
Ud2 Dc2	1.5Mpa	90°	4	53	180.54
Ud2 Dc2	1.5Mpa	90°	4	54	180.45
Ud2 Dc2	1.5Mpa	90°	4	55	93.16
Ud2 Dc2	1.5Mpa	90°	4	56	136.17
Ud2 Dc2	1.5Mpa	90°	4	57	162.48
Ud2 Dc2	1.5Mpa	90°	4	58	147.45
Ud2 Dc2	1.5Mpa	90°	4	59	81.08
Ud2 Dc2	1.5Mpa	90°	4	60	115.23
Uc3 Db3	1.5Mpa	90°	5	1	242.21
Uc3 Db3	1.5Mpa	90°	5	2	125.37
Uc3 Db3	1.5Mpa	90°	5	3	171.26
Uc3 Db3	1.5Mpa	90°	5	4	131.4
Uc3 Db3	1.5Mpa	90°	5	5	203.16
Uc3 Db3	1.5Mpa	90°	5	6	151.19
Uc3 Db3	1.5Mpa	90°	5	7	150.05
Uc3 Db3	1.5Mpa	90°	5	8	150.93
Uc3 Db3	1.5Mpa	90°	5	9	139.87
Uc3 Db3	1.5Mpa	90°	5	10	128.45
Uc3 Db3	1.5Mpa	90°	5	11	102.92
Uc3 Db3	1.5Mpa	90°	5	12	157.62
Uc3 Db3	1.5Mpa	90°	5	13	205.2
Uc3 Db3	1.5Mpa	90°	5	14	168.54
Uc3 Db3	1.5Mpa	90°	5	15	153.23
Uc3 Db3	1.5Mpa	90°	5	16	4.66
Uc3 Db3	1.5Mpa	90°	5	17	6.59
Uc3 Db3	1.5Mpa	90°	5	18	2.08
Uc3 Db3	1.5Mpa	90°	5	19	2.95
Uc3 Db3	1.5Mpa	90°	5	20	2.09
Uc3 Db3	1.5Mpa	90°	5	21	2.95
Uc3 Db3	1.5Mpa	90°	5	22	15.17
Uc3 Db3	1.5Mpa	90°	5	23	6.59
Uc3 Db3	1.5Mpa	90°	5	24	4.66
Uc3 Db3	1.5Mpa	90°	5	25	2.08
Uc3 Db3	1.5Mpa	90°	5	26	2.08
Uc3 Db3	1.5Mpa	90°	5	27	6.25
Uc3 Db3	1.5Mpa	90°	5	28	2.08
Uc3 Db3	1.5Mpa	90°	5	29	4.66
Uc3 Db3	1.5Mpa	90°	5	30	6.59
Uc3 Db3	1.5Mpa	90°	5	31	71.32
Uc3 Db3	1.5Mpa	90°	5	32	54.17
Uc3 Db3	1.5Mpa	90°	5	33	31.32
Uc3 Db3	1.5Mpa	90°	5	34	40.93
Uc3 Db3	1.5Mpa	90°	5	35	73.18
Uc3 Db3	1.5Mpa	90°	5	36	47.92
Uc3 Db3	1.5Mpa	90°	5	37	50.69
Uc3 Db3	1.5Mpa	90°	5	38	66.7
Uc3 Db3	1.5Mpa	90°	5	39	79.28
Uc3 Db3	1.5Mpa	90°	5	40	50.39
Uc3 Db3	1.5Mpa	90°	5	41	52.46
Uc3 Db3	1.5Mpa	90°	5	42	50.17
Uc3 Db3	1.5Mpa	90°	5	43	50.17
Uc3 Db3	1.5Mpa	90°	5	44	62.81
Uc3 Db3	1.5Mpa	90°	5	45	56.29
Uc3 Db3	1.5Mpa	90°	5	46	175.81
Uc3 Db3	1.5Mpa	90°	5	47	168.2
Uc3 Db3	1.5Mpa	90°	5	48	245.6
Uc3 Db3	1.5Mpa	90°	5	49	108.79
Uc3 Db3	1.5Mpa	90°	5	50	153.83
Uc3 Db3	1.5Mpa	90°	5	51	158.24
Uc3 Db3	1.5Mpa	90°	5	52	94.3
Uc3 Db3	1.5Mpa	90°	5	53	142.22
Uc3 Db3	1.5Mpa	90°	5	54	164.32
Uc3 Db3	1.5Mpa	90°	5	55	183.35
Uc3 Db3	1.5Mpa	90°	5	56	276.1
Uc3 Db3	1.5Mpa	90°	5	57	261.87
Uc3 Db3	1.5Mpa	90°	5	58	200.3
Uc3 Db3	1.5Mpa	90°	5	59	240.58
Uc3 Db3	1.5Mpa	90°	5	60	229.31
Ud2 Dc2	1.5Mpa	90°	5	1	220.82
Ud2 Dc2	1.5Mpa	90°	5	2	112.7
Ud2 Dc2	1.5Mpa	90°	5	3	235.88
Ud2 Dc2	1.5Mpa	90°	5	4	134.6
Ud2 Dc2	1.5Mpa	90°	5	5	215.85
Ud2 Dc2	1.5Mpa	90°	5	6	111.02
Ud2 Dc2	1.5Mpa	90°	5	7	132.39
Ud2 Dc2	1.5Mpa	90°	5	8	108.16
Ud2 Dc2	1.5Mpa	90°	5	9	188.58
Ud2 Dc2	1.5Mpa	90°	5	10	109.73
Ud2 Dc2	1.5Mpa	90°	5	11	112.16
Ud2 Dc2	1.5Mpa	90°	5	12	244.6
Ud2 Dc2	1.5Mpa	90°	5	13	200.45
Ud2 Dc2	1.5Mpa	90°	5	14	108.29
Ud2 Dc2	1.5Mpa	90°	5	15	204.5
Ud2 Dc2	1.5Mpa	90°	5	16	2.08
Ud2 Dc2	1.5Mpa	90°	5	17	8.34
Ud2 Dc2	1.5Mpa	90°	5	18	8.34
Ud2 Dc2	1.5Mpa	90°	5	19	2.08
Ud2 Dc2	1.5Mpa	90°	5	20	2.08
Ud2 Dc2	1.5Mpa	90°	5	21	2.95
Ud2 Dc2	1.5Mpa	90°	5	22	2.95
Ud2 Dc2	1.5Mpa	90°	5	23	2.95
Ud2 Dc2	1.5Mpa	90°	5	24	10.43
Ud2 Dc2	1.5Mpa	90°	5	25	4.66
Ud2 Dc2	1.5Mpa	90°	5	26	2.08
Ud2 Dc2	1.5Mpa	90°	5	27	2.08
Ud2 Dc2	1.5Mpa	90°	5	28	4.66
Ud2 Dc2	1.5Mpa	90°	5	29	4.17
Ud2 Dc2	1.5Mpa	90°	5	30	4.66
Ud2 Dc2	1.5Mpa	90°	5	31	58.38
Ud2 Dc2	1.5Mpa	90°	5	32	41.75
Ud2 Dc2	1.5Mpa	90°	5	33	41.75
Ud2 Dc2	1.5Mpa	90°	5	34	48.14
Ud2 Dc2	1.5Mpa	90°	5	35	41.7
Ud2 Dc2	1.5Mpa	90°	5	36	41.91
Ud2 Dc2	1.5Mpa	90°	5	37	39.83
Ud2 Dc2	1.5Mpa	90°	5	38	38.05
Ud2 Dc2	1.5Mpa	90°	5	39	47.95
Ud2 Dc2	1.5Mpa	90°	5	40	39.83
Ud2 Dc2	1.5Mpa	90°	5	41	58.97
Ud2 Dc2	1.5Mpa	90°	5	42	50.21
Ud2 Dc2	1.5Mpa	90°	5	43	65.17
Ud2 Dc2	1.5Mpa	90°	5	44	43.83
Ud2 Dc2	1.5Mpa	90°	5	45	56.64
Ud2 Dc2	1.5Mpa	90°	5	46	216.26
Ud2 Dc2	1.5Mpa	90°	5	47	101.79
Ud2 Dc2	1.5Mpa	90°	5	48	173.1
Ud2 Dc2	1.5Mpa	90°	5	49	180.89
Ud2 Dc2	1.5Mpa	90°	5	50	168.79
Ud2 Dc2	1.5Mpa	90°	5	51	176.28
Ud2 Dc2	1.5Mpa	90°	5	52	236.73
Ud2 Dc2	1.5Mpa	90°	5	53	254.35
Ud2 Dc2	1.5Mpa	90°	5	54	207.76
Ud2 Dc2	1.5Mpa	90°	5	55	196.73
Ud2 Dc2	1.5Mpa	90°	5	56	141.09
Ud2 Dc2	1.5Mpa	90°	5	57	175.49
Ud2 Dc2	1.5Mpa	90°	5	58	202.33
Ud2 Dc2	1.5Mpa	90°	5	59	164.4
Ud2 Dc2	1.5Mpa	90°	5	60	223.89
Ua2 Dd2	1Mpa	90°	1	1	218.76
Ua2 Dd2	1Mpa	90°	1	2	210.16
Ua2 Dd2	1Mpa	90°	1	3	221.48
Ua2 Dd2	1Mpa	90°	1	4	203.36
Ua2 Dd2	1Mpa	90°	1	5	152.7
Ua2 Dd2	1Mpa	90°	1	6	187.9
Ua2 Dd2	1Mpa	90°	1	7	225.09
Ua2 Dd2	1Mpa	90°	1	8	204.49
Ua2 Dd2	1Mpa	90°	1	9	222.32
Ua2 Dd2	1Mpa	90°	1	10	123.09
Ua2 Dd2	1Mpa	90°	1	11	178.05
Ua2 Dd2	1Mpa	90°	1	12	195.5
Ua2 Dd2	1Mpa	90°	1	13	136.26
Ua2 Dd2	1Mpa	90°	1	14	199.02
Ua2 Dd2	1Mpa	90°	1	15	172.97
Ua2 Dd2	1Mpa	90°	1	16	4.66
Ua2 Dd2	1Mpa	90°	1	17	6.59
Ua2 Dd2	1Mpa	90°	1	18	2.08
Ua2 Dd2	1Mpa	90°	1	19	13.18
Ua2 Dd2	1Mpa	90°	1	20	4.17
Ua2 Dd2	1Mpa	90°	1	21	4.17
Ua2 Dd2	1Mpa	90°	1	22	4.17
Ua2 Dd2	1Mpa	90°	1	23	2.08
Ua2 Dd2	1Mpa	90°	1	24	4.66
Ua2 Dd2	1Mpa	90°	1	25	6.59
Ua2 Dd2	1Mpa	90°	1	26	4.17
Ua2 Dd2	1Mpa	90°	1	27	6.59
Ua2 Dd2	1Mpa	90°	1	28	4.66
Ua2 Dd2	1Mpa	90°	1	29	2.95
Ua2 Dd2	1Mpa	90°	1	30	4.17
Ua2 Dd2	1Mpa	90°	1	31	42.95
Ua2 Dd2	1Mpa	90°	1	32	39.53
Ua2 Dd2	1Mpa	90°	1	33	52.09
Ua2 Dd2	1Mpa	90°	1	34	44.15
Ua2 Dd2	1Mpa	90°	1	35	25.34
Ua2 Dd2	1Mpa	90°	1	36	62.15
Ua2 Dd2	1Mpa	90°	1	37	50.17
Ua2 Dd2	1Mpa	90°	1	38	51.46
Ua2 Dd2	1Mpa	90°	1	39	32.34
Ua2 Dd2	1Mpa	90°	1	40	52.25
Ua2 Dd2	1Mpa	90°	1	41	53.12
Ua2 Dd2	1Mpa	90°	1	42	54.33
Ua2 Dd2	1Mpa	90°	1	43	35.48
Ua2 Dd2	1Mpa	90°	1	44	50.04
Ua2 Dd2	1Mpa	90°	1	45	37.56
Ua2 Dd2	1Mpa	90°	1	46	225.07
Ua2 Dd2	1Mpa	90°	1	47	170.14
Ua2 Dd2	1Mpa	90°	1	48	239.14
Ua2 Dd2	1Mpa	90°	1	49	160.64
Ua2 Dd2	1Mpa	90°	1	50	213.07
Ua2 Dd2	1Mpa	90°	1	51	227.9
Ua2 Dd2	1Mpa	90°	1	52	100.86
Ua2 Dd2	1Mpa	90°	1	53	144.23
Ua2 Dd2	1Mpa	90°	1	54	187.55
Ua2 Dd2	1Mpa	90°	1	55	266.67
Ua2 Dd2	1Mpa	90°	1	56	202.97
Ua2 Dd2	1Mpa	90°	1	57	163.67
Ua2 Dd2	1Mpa	90°	1	58	240.46
Ua2 Dd2	1Mpa	90°	1	59	175.23
Ua2 Dd2	1Mpa	90°	1	60	163.08
Ud3 Dc3	1Mpa	90°	1	1	183.19
Ud3 Dc3	1Mpa	90°	1	2	198.66
Ud3 Dc3	1Mpa	90°	1	3	104.66
Ud3 Dc3	1Mpa	90°	1	4	174
Ud3 Dc3	1Mpa	90°	1	5	131.45
Ud3 Dc3	1Mpa	90°	1	6	111.79
Ud3 Dc3	1Mpa	90°	1	7	102.28
Ud3 Dc3	1Mpa	90°	1	8	170.63
Ud3 Dc3	1Mpa	90°	1	9	197.23
Ud3 Dc3	1Mpa	90°	1	10	124.85
Ud3 Dc3	1Mpa	90°	1	11	261.6
Ud3 Dc3	1Mpa	90°	1	12	225.14
Ud3 Dc3	1Mpa	90°	1	13	173.7
Ud3 Dc3	1Mpa	90°	1	14	144.01
Ud3 Dc3	1Mpa	90°	1	15	175.23
Ud3 Dc3	1Mpa	90°	1	16	11.04
Ud3 Dc3	1Mpa	90°	1	17	4.1
Ud3 Dc3	1Mpa	90°	1	18	9.17
Ud3 Dc3	1Mpa	90°	1	19	6.49
Ud3 Dc3	1Mpa	90°	1	20	4.59
Ud3 Dc3	1Mpa	90°	1	21	4.59
Ud3 Dc3	1Mpa	90°	1	22	2.05
Ud3 Dc3	1Mpa	90°	1	23	4.59
Ud3 Dc3	1Mpa	90°	1	24	2.05
Ud3 Dc3	1Mpa	90°	1	25	6.49
Ud3 Dc3	1Mpa	90°	1	26	6.49
Ud3 Dc3	1Mpa	90°	1	27	4.59
Ud3 Dc3	1Mpa	90°	1	28	8.45
Ud3 Dc3	1Mpa	90°	1	29	4.59
Ud3 Dc3	1Mpa	90°	1	30	4.1
Ud3 Dc3	1Mpa	90°	1	31	51.43
Ud3 Dc3	1Mpa	90°	1	32	47.21
Ud3 Dc3	1Mpa	90°	1	33	39.01
Ud3 Dc3	1Mpa	90°	1	34	71.77
Ud3 Dc3	1Mpa	90°	1	35	47.34
Ud3 Dc3	1Mpa	90°	1	36	67.7
Ud3 Dc3	1Mpa	90°	1	37	34.92
Ud3 Dc3	1Mpa	90°	1	38	45.11
Ud3 Dc3	1Mpa	90°	1	39	75.9
Ud3 Dc3	1Mpa	90°	1	40	51.43
Ud3 Dc3	1Mpa	90°	1	41	53.31
Ud3 Dc3	1Mpa	90°	1	42	53.31
Ud3 Dc3	1Mpa	90°	1	43	47.21
Ud3 Dc3	1Mpa	90°	1	44	55.52
Ud3 Dc3	1Mpa	90°	1	45	45.16
Ud3 Dc3	1Mpa	90°	1	46	262.79
Ud3 Dc3	1Mpa	90°	1	47	208.84
Ud3 Dc3	1Mpa	90°	1	48	242.22
Ud3 Dc3	1Mpa	90°	1	49	143.64
Ud3 Dc3	1Mpa	90°	1	50	169.93
Ud3 Dc3	1Mpa	90°	1	51	158.17
Ud3 Dc3	1Mpa	90°	1	52	118.17
Ud3 Dc3	1Mpa	90°	1	53	223.31
Ud3 Dc3	1Mpa	90°	1	54	140.54
Ud3 Dc3	1Mpa	90°	1	55	116.71
Ud3 Dc3	1Mpa	90°	1	56	140.85
Ud3 Dc3	1Mpa	90°	1	57	116.11
Ud3 Dc3	1Mpa	90°	1	58	198.12
Ud3 Dc3	1Mpa	90°	1	59	202.65
Ud3 Dc3	1Mpa	90°	1	60	216.3
Ua2 Dd2	1Mpa	90°	2	1	212.38
Ua2 Dd2	1Mpa	90°	2	2	218.91
Ua2 Dd2	1Mpa	90°	2	3	190.79
Ua2 Dd2	1Mpa	90°	2	4	314.13
Ua2 Dd2	1Mpa	90°	2	5	302.92
Ua2 Dd2	1Mpa	90°	2	6	166.74
Ua2 Dd2	1Mpa	90°	2	7	111.97
Ua2 Dd2	1Mpa	90°	2	8	205.63
Ua2 Dd2	1Mpa	90°	2	9	260.5
Ua2 Dd2	1Mpa	90°	2	10	298.43
Ua2 Dd2	1Mpa	90°	2	11	139.85
Ua2 Dd2	1Mpa	90°	2	12	115.99
Ua2 Dd2	1Mpa	90°	2	13	191.7
Ua2 Dd2	1Mpa	90°	2	14	160.78
Ua2 Dd2	1Mpa	90°	2	15	305.08
Ua2 Dd2	1Mpa	90°	2	16	12.7
Ua2 Dd2	1Mpa	90°	2	17	11.1
Ua2 Dd2	1Mpa	90°	2	18	2.9
Ua2 Dd2	1Mpa	90°	2	19	8.7
Ua2 Dd2	1Mpa	90°	2	20	2.9
Ua2 Dd2	1Mpa	90°	2	21	4.1
Ua2 Dd2	1Mpa	90°	2	22	7.39
Ua2 Dd2	1Mpa	90°	2	23	10.25
Ua2 Dd2	1Mpa	90°	2	24	4.59
Ua2 Dd2	1Mpa	90°	2	25	7.39
Ua2 Dd2	1Mpa	90°	2	26	4.59
Ua2 Dd2	1Mpa	90°	2	27	5.8
Ua2 Dd2	1Mpa	90°	2	28	2.05
Ua2 Dd2	1Mpa	90°	2	29	2.9
Ua2 Dd2	1Mpa	90°	2	30	2.9
Ua2 Dd2	1Mpa	90°	2	31	67.75
Ua2 Dd2	1Mpa	90°	2	32	59.51
Ua2 Dd2	1Mpa	90°	2	33	55.4
Ua2 Dd2	1Mpa	90°	2	34	67.75
Ua2 Dd2	1Mpa	90°	2	35	80.05
Ua2 Dd2	1Mpa	90°	2	36	80.03
Ua2 Dd2	1Mpa	90°	2	37	51.34
Ua2 Dd2	1Mpa	90°	2	38	73.87
Ua2 Dd2	1Mpa	90°	2	39	73.9
Ua2 Dd2	1Mpa	90°	2	40	63.74
Ua2 Dd2	1Mpa	90°	2	41	61.56
Ua2 Dd2	1Mpa	90°	2	42	49.29
Ua2 Dd2	1Mpa	90°	2	43	47.24
Ua2 Dd2	1Mpa	90°	2	44	73.9
Ua2 Dd2	1Mpa	90°	2	45	43.14
Ua2 Dd2	1Mpa	90°	2	46	233.05
Ua2 Dd2	1Mpa	90°	2	47	119.58
Ua2 Dd2	1Mpa	90°	2	48	103.7
Ua2 Dd2	1Mpa	90°	2	49	239.47
Ua2 Dd2	1Mpa	90°	2	50	275.26
Ua2 Dd2	1Mpa	90°	2	51	148.63
Ua2 Dd2	1Mpa	90°	2	52	163.77
Ua2 Dd2	1Mpa	90°	2	53	197.4
Ua2 Dd2	1Mpa	90°	2	54	216.14
Ua2 Dd2	1Mpa	90°	2	55	182.59
Ua2 Dd2	1Mpa	90°	2	56	116.36
Ua2 Dd2	1Mpa	90°	2	57	175.29
Ua2 Dd2	1Mpa	90°	2	58	126.62
Ua2 Dd2	1Mpa	90°	2	59	127.46
Ua2 Dd2	1Mpa	90°	2	60	166.15
Ud3 Dc3	1Mpa	90°	2	1	126.3
Ud3 Dc3	1Mpa	90°	2	2	186.1
Ud3 Dc3	1Mpa	90°	2	3	192.57
Ud3 Dc3	1Mpa	90°	2	4	141.73
Ud3 Dc3	1Mpa	90°	2	5	84.56
Ud3 Dc3	1Mpa	90°	2	6	100.29
Ud3 Dc3	1Mpa	90°	2	7	97.26
Ud3 Dc3	1Mpa	90°	2	8	127.5
Ud3 Dc3	1Mpa	90°	2	9	132.78
Ud3 Dc3	1Mpa	90°	2	10	260.74
Ud3 Dc3	1Mpa	90°	2	11	172.67
Ud3 Dc3	1Mpa	90°	2	12	139.71
Ud3 Dc3	1Mpa	90°	2	13	207.87
Ud3 Dc3	1Mpa	90°	2	14	244.07
Ud3 Dc3	1Mpa	90°	2	15	126.34
Ud3 Dc3	1Mpa	90°	2	16	8.71
Ud3 Dc3	1Mpa	90°	2	17	3.08
Ud3 Dc3	1Mpa	90°	2	18	11.1
Ud3 Dc3	1Mpa	90°	2	19	9.23
Ud3 Dc3	1Mpa	90°	2	20	4.35
Ud3 Dc3	1Mpa	90°	2	21	4.35
Ud3 Dc3	1Mpa	90°	2	22	8.71
Ud3 Dc3	1Mpa	90°	2	23	6.89
Ud3 Dc3	1Mpa	90°	2	24	6.89
Ud3 Dc3	1Mpa	90°	2	25	3.08
Ud3 Dc3	1Mpa	90°	2	26	3.08
Ud3 Dc3	1Mpa	90°	2	27	8.71
Ud3 Dc3	1Mpa	90°	2	28	4.35
Ud3 Dc3	1Mpa	90°	2	29	3.08
Ud3 Dc3	1Mpa	90°	2	30	4.35
Ud3 Dc3	1Mpa	90°	2	31	42.3
Ud3 Dc3	1Mpa	90°	2	32	35.43
Ud3 Dc3	1Mpa	90°	2	33	34.88
Ud3 Dc3	1Mpa	90°	2	34	59.08
Ud3 Dc3	1Mpa	90°	2	35	34.88
Ud3 Dc3	1Mpa	90°	2	36	32.05
Ud3 Dc3	1Mpa	90°	2	37	40.32
Ud3 Dc3	1Mpa	90°	2	38	47.85
Ud3 Dc3	1Mpa	90°	2	39	66.81
Ud3 Dc3	1Mpa	90°	2	40	33.15
Ud3 Dc3	1Mpa	90°	2	41	40.42
Ud3 Dc3	1Mpa	90°	2	42	38.34
Ud3 Dc3	1Mpa	90°	2	43	81.69
Ud3 Dc3	1Mpa	90°	2	44	56
Ud3 Dc3	1Mpa	90°	2	45	41.54
Ud3 Dc3	1Mpa	90°	2	46	293.27
Ud3 Dc3	1Mpa	90°	2	47	273.01
Ud3 Dc3	1Mpa	90°	2	48	193.65
Ud3 Dc3	1Mpa	90°	2	49	153.93
Ud3 Dc3	1Mpa	90°	2	50	166.19
Ud3 Dc3	1Mpa	90°	2	51	187.65
Ud3 Dc3	1Mpa	90°	2	52	219.25
Ud3 Dc3	1Mpa	90°	2	53	154.46
Ud3 Dc3	1Mpa	90°	2	54	154.13
Ud3 Dc3	1Mpa	90°	2	55	150.8
Ud3 Dc3	1Mpa	90°	2	56	238.37
Ud3 Dc3	1Mpa	90°	2	57	116.39
Ud3 Dc3	1Mpa	90°	2	58	170.07
Ud3 Dc3	1Mpa	90°	2	59	150.75
Ud3 Dc3	1Mpa	90°	2	60	125.69
Ua2 Dd2	1Mpa	90°	3	1	241.13
Ua2 Dd2	1Mpa	90°	3	2	257.85
Ua2 Dd2	1Mpa	90°	3	3	178.75
Ua2 Dd2	1Mpa	90°	3	4	234.67
Ua2 Dd2	1Mpa	90°	3	5	179.61
Ua2 Dd2	1Mpa	90°	3	6	225.35
Ua2 Dd2	1Mpa	90°	3	7	141.73
Ua2 Dd2	1Mpa	90°	3	8	194.23
Ua2 Dd2	1Mpa	90°	3	9	239.84
Ua2 Dd2	1Mpa	90°	3	10	136.72
Ua2 Dd2	1Mpa	90°	3	11	99.04
Ua2 Dd2	1Mpa	90°	3	12	105.62
Ua2 Dd2	1Mpa	90°	3	13	204.41
Ua2 Dd2	1Mpa	90°	3	14	219.23
Ua2 Dd2	1Mpa	90°	3	15	127.08
Ua2 Dd2	1Mpa	90°	3	16	5.89
Ua2 Dd2	1Mpa	90°	3	17	4.66
Ua2 Dd2	1Mpa	90°	3	18	4.66
Ua2 Dd2	1Mpa	90°	3	19	8.33
Ua2 Dd2	1Mpa	90°	3	20	12.5
Ua2 Dd2	1Mpa	90°	3	21	4.66
Ua2 Dd2	1Mpa	90°	3	22	8.33
Ua2 Dd2	1Mpa	90°	3	23	8.33
Ua2 Dd2	1Mpa	90°	3	24	6.59
Ua2 Dd2	1Mpa	90°	3	25	13.98
Ua2 Dd2	1Mpa	90°	3	26	2.08
Ua2 Dd2	1Mpa	90°	3	27	2.08
Ua2 Dd2	1Mpa	90°	3	28	4.66
Ua2 Dd2	1Mpa	90°	3	29	4.17
Ua2 Dd2	1Mpa	90°	3	30	8.59
Ua2 Dd2	1Mpa	90°	3	31	45.88
Ua2 Dd2	1Mpa	90°	3	32	44.19
Ua2 Dd2	1Mpa	90°	3	33	49.04
Ua2 Dd2	1Mpa	90°	3	34	67.83
Ua2 Dd2	1Mpa	90°	3	35	49.52
Ua2 Dd2	1Mpa	90°	3	36	44.97
Ua2 Dd2	1Mpa	90°	3	37	45.5
Ua2 Dd2	1Mpa	90°	3	38	51.46
Ua2 Dd2	1Mpa	90°	3	39	42.95
Ua2 Dd2	1Mpa	90°	3	40	44.19
Ua2 Dd2	1Mpa	90°	3	41	46.26
Ua2 Dd2	1Mpa	90°	3	42	41.67
Ua2 Dd2	1Mpa	90°	3	43	48.64
Ua2 Dd2	1Mpa	90°	3	44	62.54
Ua2 Dd2	1Mpa	90°	3	45	37.73
Ua2 Dd2	1Mpa	90°	3	46	126.73
Ua2 Dd2	1Mpa	90°	3	47	166.18
Ua2 Dd2	1Mpa	90°	3	48	193.67
Ua2 Dd2	1Mpa	90°	3	49	176.51
Ua2 Dd2	1Mpa	90°	3	50	265.97
Ua2 Dd2	1Mpa	90°	3	51	87.03
Ua2 Dd2	1Mpa	90°	3	52	166.63
Ua2 Dd2	1Mpa	90°	3	53	134.71
Ua2 Dd2	1Mpa	90°	3	54	164
Ua2 Dd2	1Mpa	90°	3	55	121.49
Ua2 Dd2	1Mpa	90°	3	56	150.08
Ua2 Dd2	1Mpa	90°	3	57	136.51
Ua2 Dd2	1Mpa	90°	3	58	204.9
Ua2 Dd2	1Mpa	90°	3	59	185.65
Ua2 Dd2	1Mpa	90°	3	60	205.55
Ud3 Dc3	1Mpa	90°	3	1	178.29
Ud3 Dc3	1Mpa	90°	3	2	177.17
Ud3 Dc3	1Mpa	90°	3	3	141.28
Ud3 Dc3	1Mpa	90°	3	4	143.8
Ud3 Dc3	1Mpa	90°	3	5	117.03
Ud3 Dc3	1Mpa	90°	3	6	177.89
Ud3 Dc3	1Mpa	90°	3	7	120.71
Ud3 Dc3	1Mpa	90°	3	8	113.56
Ud3 Dc3	1Mpa	90°	3	9	162.55
Ud3 Dc3	1Mpa	90°	3	10	90.19
Ud3 Dc3	1Mpa	90°	3	11	169.44
Ud3 Dc3	1Mpa	90°	3	12	207.69
Ud3 Dc3	1Mpa	90°	3	13	134.19
Ud3 Dc3	1Mpa	90°	3	14	142.72
Ud3 Dc3	1Mpa	90°	3	15	109.63
Ud3 Dc3	1Mpa	90°	3	16	4.04
Ud3 Dc3	1Mpa	90°	3	17	4.04
Ud3 Dc3	1Mpa	90°	3	18	4.04
Ud3 Dc3	1Mpa	90°	3	19	2.86
Ud3 Dc3	1Mpa	90°	3	20	4.04
Ud3 Dc3	1Mpa	90°	3	21	8.32
Ud3 Dc3	1Mpa	90°	3	22	4.51
Ud3 Dc3	1Mpa	90°	3	23	2.02
Ud3 Dc3	1Mpa	90°	3	24	2.86
Ud3 Dc3	1Mpa	90°	3	25	2.02
Ud3 Dc3	1Mpa	90°	3	26	4.04
Ud3 Dc3	1Mpa	90°	3	27	4.51
Ud3 Dc3	1Mpa	90°	3	28	10.09
Ud3 Dc3	1Mpa	90°	3	29	4.51
Ud3 Dc3	1Mpa	90°	3	30	8.08
Ud3 Dc3	1Mpa	90°	3	31	46.48
Ud3 Dc3	1Mpa	90°	3	32	38.41
Ud3 Dc3	1Mpa	90°	3	33	44.46
Ud3 Dc3	1Mpa	90°	3	34	64.6
Ud3 Dc3	1Mpa	90°	3	35	52.64
Ud3 Dc3	1Mpa	90°	3	36	60.6
Ud3 Dc3	1Mpa	90°	3	37	63.1
Ud3 Dc3	1Mpa	90°	3	38	42.4
Ud3 Dc3	1Mpa	90°	3	39	60.57
Ud3 Dc3	1Mpa	90°	3	40	44.46
Ud3 Dc3	1Mpa	90°	3	41	40.43
Ud3 Dc3	1Mpa	90°	3	42	46.83
Ud3 Dc3	1Mpa	90°	3	43	42.44
Ud3 Dc3	1Mpa	90°	3	44	30.28
Ud3 Dc3	1Mpa	90°	3	45	46.48
Ud3 Dc3	1Mpa	90°	3	46	157.66
Ud3 Dc3	1Mpa	90°	3	47	132.05
Ud3 Dc3	1Mpa	90°	3	48	132.77
Ud3 Dc3	1Mpa	90°	3	49	285.41
Ud3 Dc3	1Mpa	90°	3	50	159.29
Ud3 Dc3	1Mpa	90°	3	51	183.37
Ud3 Dc3	1Mpa	90°	3	52	152.11
Ud3 Dc3	1Mpa	90°	3	53	161.4
Ud3 Dc3	1Mpa	90°	3	54	174.19
Ud3 Dc3	1Mpa	90°	3	55	224.27
Ud3 Dc3	1Mpa	90°	3	56	155.15
Ud3 Dc3	1Mpa	90°	3	57	178.88
Ud3 Dc3	1Mpa	90°	3	58	116.5
Ud3 Dc3	1Mpa	90°	3	59	172.85
Ud3 Dc3	1Mpa	90°	3	60	215.86
Ua2 Dd2	1Mpa	90°	4	1	319.57
Ua2 Dd2	1Mpa	90°	4	2	255.75
Ua2 Dd2	1Mpa	90°	4	3	186.93
Ua2 Dd2	1Mpa	90°	4	4	195.21
Ua2 Dd2	1Mpa	90°	4	5	172.72
Ua2 Dd2	1Mpa	90°	4	6	224.72
Ua2 Dd2	1Mpa	90°	4	7	269.79
Ua2 Dd2	1Mpa	90°	4	8	174.01
Ua2 Dd2	1Mpa	90°	4	9	157.6
Ua2 Dd2	1Mpa	90°	4	10	181.77
Ua2 Dd2	1Mpa	90°	4	11	197.66
Ua2 Dd2	1Mpa	90°	4	12	251.41
Ua2 Dd2	1Mpa	90°	4	13	155.79
Ua2 Dd2	1Mpa	90°	4	14	156.24
Ua2 Dd2	1Mpa	90°	4	15	274.67
Ua2 Dd2	1Mpa	90°	4	16	13.69
Ua2 Dd2	1Mpa	90°	4	17	14.43
Ua2 Dd2	1Mpa	90°	4	18	9.13
Ua2 Dd2	1Mpa	90°	4	19	7.22
Ua2 Dd2	1Mpa	90°	4	20	1.85
Ua2 Dd2	1Mpa	90°	4	21	9.23
Ua2 Dd2	1Mpa	90°	4	22	8.25
Ua2 Dd2	1Mpa	90°	4	23	4.13
Ua2 Dd2	1Mpa	90°	4	24	8.25
Ua2 Dd2	1Mpa	90°	4	25	2.61
Ua2 Dd2	1Mpa	90°	4	26	4.13
Ua2 Dd2	1Mpa	90°	4	27	7.83
Ua2 Dd2	1Mpa	90°	4	28	4.13
Ua2 Dd2	1Mpa	90°	4	29	8.25
Ua2 Dd2	1Mpa	90°	4	30	3.69
Ua2 Dd2	1Mpa	90°	4	31	39.23
Ua2 Dd2	1Mpa	90°	4	32	44.36
Ua2 Dd2	1Mpa	90°	4	33	31.43
Ua2 Dd2	1Mpa	90°	4	34	38.93
Ua2 Dd2	1Mpa	90°	4	35	43.08
Ua2 Dd2	1Mpa	90°	4	36	53.23
Ua2 Dd2	1Mpa	90°	4	37	43.04
Ua2 Dd2	1Mpa	90°	4	38	41.84
Ua2 Dd2	1Mpa	90°	4	39	37.86
Ua2 Dd2	1Mpa	90°	4	40	39.49
Ua2 Dd2	1Mpa	90°	4	41	35.26
Ua2 Dd2	1Mpa	90°	4	42	64.27
Ua2 Dd2	1Mpa	90°	4	43	61.43
Ua2 Dd2	1Mpa	90°	4	44	55.79
Ua2 Dd2	1Mpa	90°	4	45	57.65
Ua2 Dd2	1Mpa	90°	4	46	267.56
Ua2 Dd2	1Mpa	90°	4	47	181.27
Ua2 Dd2	1Mpa	90°	4	48	145.83
Ua2 Dd2	1Mpa	90°	4	49	255.41
Ua2 Dd2	1Mpa	90°	4	50	176.95
Ua2 Dd2	1Mpa	90°	4	51	237.62
Ua2 Dd2	1Mpa	90°	4	52	165.51
Ua2 Dd2	1Mpa	90°	4	53	175.51
Ua2 Dd2	1Mpa	90°	4	54	163.96
Ua2 Dd2	1Mpa	90°	4	55	134.84
Ua2 Dd2	1Mpa	90°	4	56	133.72
Ua2 Dd2	1Mpa	90°	4	57	158.13
Ua2 Dd2	1Mpa	90°	4	58	185.57
Ua2 Dd2	1Mpa	90°	4	59	137.87
Ua2 Dd2	1Mpa	90°	4	60	147.05
Ud3 Dc3	1Mpa	90°	4	1	139.47
Ud3 Dc3	1Mpa	90°	4	2	163.61
Ud3 Dc3	1Mpa	90°	4	3	156.07
Ud3 Dc3	1Mpa	90°	4	4	161.35
Ud3 Dc3	1Mpa	90°	4	5	140.75
Ud3 Dc3	1Mpa	90°	4	6	151.95
Ud3 Dc3	1Mpa	90°	4	7	113.32
Ud3 Dc3	1Mpa	90°	4	8	177.47
Ud3 Dc3	1Mpa	90°	4	9	152.59
Ud3 Dc3	1Mpa	90°	4	10	169.53
Ud3 Dc3	1Mpa	90°	4	11	221.73
Ud3 Dc3	1Mpa	90°	4	12	169.38
Ud3 Dc3	1Mpa	90°	4	13	186.42
Ud3 Dc3	1Mpa	90°	4	14	178.06
Ud3 Dc3	1Mpa	90°	4	15	133.96
Ud3 Dc3	1Mpa	90°	4	16	6.35
Ud3 Dc3	1Mpa	90°	4	17	12.7
Ud3 Dc3	1Mpa	90°	4	18	4.23
Ud3 Dc3	1Mpa	90°	4	19	6.35
Ud3 Dc3	1Mpa	90°	4	20	2.12
Ud3 Dc3	1Mpa	90°	4	21	3
Ud3 Dc3	1Mpa	90°	4	22	8.73
Ud3 Dc3	1Mpa	90°	4	23	2.12
Ud3 Dc3	1Mpa	90°	4	24	8.47
Ud3 Dc3	1Mpa	90°	4	25	4.23
Ud3 Dc3	1Mpa	90°	4	26	4.23
Ud3 Dc3	1Mpa	90°	4	27	4.23
Ud3 Dc3	1Mpa	90°	4	28	4.23
Ud3 Dc3	1Mpa	90°	4	29	2.12
Ud3 Dc3	1Mpa	90°	4	30	2.12
Ud3 Dc3	1Mpa	90°	4	31	51.21
Ud3 Dc3	1Mpa	90°	4	32	57.52
Ud3 Dc3	1Mpa	90°	4	33	58.14
Ud3 Dc3	1Mpa	90°	4	34	61.73
Ud3 Dc3	1Mpa	90°	4	35	67.88
Ud3 Dc3	1Mpa	90°	4	36	47.01
Ud3 Dc3	1Mpa	90°	4	37	42.56
Ud3 Dc3	1Mpa	90°	4	38	52.97
Ud3 Dc3	1Mpa	90°	4	39	64.08
Ud3 Dc3	1Mpa	90°	4	40	53.6
Ud3 Dc3	1Mpa	90°	4	41	72.48
Ud3 Dc3	1Mpa	90°	4	42	66.48
Ud3 Dc3	1Mpa	90°	4	43	34.47
Ud3 Dc3	1Mpa	90°	4	44	60.22
Ud3 Dc3	1Mpa	90°	4	45	56.49
Ud3 Dc3	1Mpa	90°	4	46	242.41
Ud3 Dc3	1Mpa	90°	4	47	155.38
Ud3 Dc3	1Mpa	90°	4	48	151.08
Ud3 Dc3	1Mpa	90°	4	49	235.88
Ud3 Dc3	1Mpa	90°	4	50	152.82
Ud3 Dc3	1Mpa	90°	4	51	157.13
Ud3 Dc3	1Mpa	90°	4	52	243.76
Ud3 Dc3	1Mpa	90°	4	53	161.65
Ud3 Dc3	1Mpa	90°	4	54	166.92
Ud3 Dc3	1Mpa	90°	4	55	188.79
Ud3 Dc3	1Mpa	90°	4	56	115.62
Ud3 Dc3	1Mpa	90°	4	57	152.51
Ud3 Dc3	1Mpa	90°	4	58	216.18
Ud3 Dc3	1Mpa	90°	4	59	163.11
Ud3 Dc3	1Mpa	90°	4	60	159.88
Ua2 Dd2	1Mpa	90°	5	1	161.17
Ua2 Dd2	1Mpa	90°	5	2	242.6
Ua2 Dd2	1Mpa	90°	5	3	177.87
Ua2 Dd2	1Mpa	90°	5	4	144.88
Ua2 Dd2	1Mpa	90°	5	5	234.2
Ua2 Dd2	1Mpa	90°	5	6	141.4
Ua2 Dd2	1Mpa	90°	5	7	158.31
Ua2 Dd2	1Mpa	90°	5	8	238.3
Ua2 Dd2	1Mpa	90°	5	9	167.3
Ua2 Dd2	1Mpa	90°	5	10	197.3
Ua2 Dd2	1Mpa	90°	5	11	168.34
Ua2 Dd2	1Mpa	90°	5	12	200.89
Ua2 Dd2	1Mpa	90°	5	13	157.36
Ua2 Dd2	1Mpa	90°	5	14	159.43
Ua2 Dd2	1Mpa	90°	5	15	203.33
Ua2 Dd2	1Mpa	90°	5	16	4.29
Ua2 Dd2	1Mpa	90°	5	17	3.03
Ua2 Dd2	1Mpa	90°	5	18	3.03
Ua2 Dd2	1Mpa	90°	5	19	6.06
Ua2 Dd2	1Mpa	90°	5	20	3.03
Ua2 Dd2	1Mpa	90°	5	21	3.03
Ua2 Dd2	1Mpa	90°	5	22	6.06
Ua2 Dd2	1Mpa	90°	5	23	6.78
Ua2 Dd2	1Mpa	90°	5	24	3.03
Ua2 Dd2	1Mpa	90°	5	25	3.03
Ua2 Dd2	1Mpa	90°	5	26	6.06
Ua2 Dd2	1Mpa	90°	5	27	6.06
Ua2 Dd2	1Mpa	90°	5	28	3.03
Ua2 Dd2	1Mpa	90°	5	29	4.29
Ua2 Dd2	1Mpa	90°	5	30	3.03
Ua2 Dd2	1Mpa	90°	5	31	60.91
Ua2 Dd2	1Mpa	90°	5	32	57.58
Ua2 Dd2	1Mpa	90°	5	33	48.58
Ua2 Dd2	1Mpa	90°	5	34	57.66
Ua2 Dd2	1Mpa	90°	5	35	54.54
Ua2 Dd2	1Mpa	90°	5	36	51.61
Ua2 Dd2	1Mpa	90°	5	37	55.88
Ua2 Dd2	1Mpa	90°	5	38	54.88
Ua2 Dd2	1Mpa	90°	5	39	60.61
Ua2 Dd2	1Mpa	90°	5	40	57.58
Ua2 Dd2	1Mpa	90°	5	41	39.51
Ua2 Dd2	1Mpa	90°	5	42	39.4
Ua2 Dd2	1Mpa	90°	5	43	51.61
Ua2 Dd2	1Mpa	90°	5	44	45.45
Ua2 Dd2	1Mpa	90°	5	45	42.42
Ua2 Dd2	1Mpa	90°	5	46	169.98
Ua2 Dd2	1Mpa	90°	5	47	258.02
Ua2 Dd2	1Mpa	90°	5	48	154.99
Ua2 Dd2	1Mpa	90°	5	49	154.99
Ua2 Dd2	1Mpa	90°	5	50	211.28
Ua2 Dd2	1Mpa	90°	5	51	139.52
Ua2 Dd2	1Mpa	90°	5	52	230.59
Ua2 Dd2	1Mpa	90°	5	53	145.74
Ua2 Dd2	1Mpa	90°	5	54	197.78
Ua2 Dd2	1Mpa	90°	5	55	258.33
Ua2 Dd2	1Mpa	90°	5	56	198.89
Ua2 Dd2	1Mpa	90°	5	57	140.22
Ua2 Dd2	1Mpa	90°	5	58	124.49
Ua2 Dd2	1Mpa	90°	5	59	88.03
Ua2 Dd2	1Mpa	90°	5	60	106.7
Ud3 Dc3	1Mpa	90°	5	1	183.88
Ud3 Dc3	1Mpa	90°	5	2	157.33
Ud3 Dc3	1Mpa	90°	5	3	177.24
Ud3 Dc3	1Mpa	90°	5	4	185.55
Ud3 Dc3	1Mpa	90°	5	5	142.49
Ud3 Dc3	1Mpa	90°	5	6	145.96
Ud3 Dc3	1Mpa	90°	5	7	117.77
Ud3 Dc3	1Mpa	90°	5	8	89.73
Ud3 Dc3	1Mpa	90°	5	9	149.56
Ud3 Dc3	1Mpa	90°	5	10	70.35
Ud3 Dc3	1Mpa	90°	5	11	99.25
Ud3 Dc3	1Mpa	90°	5	12	109.46
Ud3 Dc3	1Mpa	90°	5	13	197.39
Ud3 Dc3	1Mpa	90°	5	14	173.63
Ud3 Dc3	1Mpa	90°	5	15	115.29
Ud3 Dc3	1Mpa	90°	5	16	2.02
Ud3 Dc3	1Mpa	90°	5	17	8.34
Ud3 Dc3	1Mpa	90°	5	18	9.04
Ud3 Dc3	1Mpa	90°	5	19	7.29
Ud3 Dc3	1Mpa	90°	5	20	2.02
Ud3 Dc3	1Mpa	90°	5	21	2.02
Ud3 Dc3	1Mpa	90°	5	22	10.11
Ud3 Dc3	1Mpa	90°	5	23	9.04
Ud3 Dc3	1Mpa	90°	5	24	8.09
Ud3 Dc3	1Mpa	90°	5	25	6.06
Ud3 Dc3	1Mpa	90°	5	26	4.04
Ud3 Dc3	1Mpa	90°	5	27	2.86
Ud3 Dc3	1Mpa	90°	5	28	4.04
Ud3 Dc3	1Mpa	90°	5	29	2.02
Ud3 Dc3	1Mpa	90°	5	30	4.52
Ud3 Dc3	1Mpa	90°	5	31	38.41
Ud3 Dc3	1Mpa	90°	5	32	34.9
Ud3 Dc3	1Mpa	90°	5	33	48.9
Ud3 Dc3	1Mpa	90°	5	34	53.52
Ud3 Dc3	1Mpa	90°	5	35	43.22
Ud3 Dc3	1Mpa	90°	5	36	62.96
Ud3 Dc3	1Mpa	90°	5	37	51.18
Ud3 Dc3	1Mpa	90°	5	38	67.81
Ud3 Dc3	1Mpa	90°	5	39	34.43
Ud3 Dc3	1Mpa	90°	5	40	45.61
Ud3 Dc3	1Mpa	90°	5	41	40.88
Ud3 Dc3	1Mpa	90°	5	42	54.43
Ud3 Dc3	1Mpa	90°	5	43	58.94
Ud3 Dc3	1Mpa	90°	5	44	68.41
Ud3 Dc3	1Mpa	90°	5	45	38.62
Ud3 Dc3	1Mpa	90°	5	46	267.35
Ud3 Dc3	1Mpa	90°	5	47	217.68
Ud3 Dc3	1Mpa	90°	5	48	127.5
Ud3 Dc3	1Mpa	90°	5	49	191.2
Ud3 Dc3	1Mpa	90°	5	50	207.36
Ud3 Dc3	1Mpa	90°	5	51	155.56
Ud3 Dc3	1Mpa	90°	5	52	126.91
Ud3 Dc3	1Mpa	90°	5	53	147.19
Ud3 Dc3	1Mpa	90°	5	54	163.95
Ud3 Dc3	1Mpa	90°	5	55	120.65
Ud3 Dc3	1Mpa	90°	5	56	143.66
Ud3 Dc3	1Mpa	90°	5	57	135.7
Ud3 Dc3	1Mpa	90°	5	58	105.84
Ud3 Dc3	1Mpa	90°	5	59	94.01
Ud3 Dc3	1Mpa	90°	5	60	147.91
Ub5 Da5	2.5Mpa	90°	1	1	150.18
Ub5 Da5	2.5Mpa	90°	1	2	200.83
Ub5 Da5	2.5Mpa	90°	1	3	176.36
Ub5 Da5	2.5Mpa	90°	1	4	86.77
Ub5 Da5	2.5Mpa	90°	1	5	182.76
Ub5 Da5	2.5Mpa	90°	1	6	137.2
Ub5 Da5	2.5Mpa	90°	1	7	140.49
Ub5 Da5	2.5Mpa	90°	1	8	175.85
Ub5 Da5	2.5Mpa	90°	1	9	143.03
Ub5 Da5	2.5Mpa	90°	1	10	112.77
Ub5 Da5	2.5Mpa	90°	1	11	131.52
Ub5 Da5	2.5Mpa	90°	1	12	131.43
Ub5 Da5	2.5Mpa	90°	1	13	138.04
Ub5 Da5	2.5Mpa	90°	1	14	134.16
Ub5 Da5	2.5Mpa	90°	1	15	103.22
Ub5 Da5	2.5Mpa	90°	1	16	2.08
Ub5 Da5	2.5Mpa	90°	1	17	2.95
Ub5 Da5	2.5Mpa	90°	1	18	4.17
Ub5 Da5	2.5Mpa	90°	1	19	2.95
Ub5 Da5	2.5Mpa	90°	1	20	4.66
Ub5 Da5	2.5Mpa	90°	1	21	4.17
Ub5 Da5	2.5Mpa	90°	1	22	4.17
Ub5 Da5	2.5Mpa	90°	1	23	2.08
Ub5 Da5	2.5Mpa	90°	1	24	2.08
Ub5 Da5	2.5Mpa	90°	1	25	4.17
Ub5 Da5	2.5Mpa	90°	1	26	8.59
Ub5 Da5	2.5Mpa	90°	1	27	4.66
Ub5 Da5	2.5Mpa	90°	1	28	8.33
Ub5 Da5	2.5Mpa	90°	1	29	5.9
Ub5 Da5	2.5Mpa	90°	1	30	7.51
Ub5 Da5	2.5Mpa	90°	1	31	36.39
Ub5 Da5	2.5Mpa	90°	1	32	76.44
Ub5 Da5	2.5Mpa	90°	1	33	41.04
Ub5 Da5	2.5Mpa	90°	1	34	41.51
Ub5 Da5	2.5Mpa	90°	1	35	40.93
Ub5 Da5	2.5Mpa	90°	1	36	47
Ub5 Da5	2.5Mpa	90°	1	37	43.96
Ub5 Da5	2.5Mpa	90°	1	38	48.47
Ub5 Da5	2.5Mpa	90°	1	39	65.26
Ub5 Da5	2.5Mpa	90°	1	40	41.94
Ub5 Da5	2.5Mpa	90°	1	41	49.53
Ub5 Da5	2.5Mpa	90°	1	42	65.89
Ub5 Da5	2.5Mpa	90°	1	43	64.69
Ub5 Da5	2.5Mpa	90°	1	44	42.95
Ub5 Da5	2.5Mpa	90°	1	45	40.93
Ub5 Da5	2.5Mpa	90°	1	46	166.86
Ub5 Da5	2.5Mpa	90°	1	47	146.33
Ub5 Da5	2.5Mpa	90°	1	48	146.66
Ub5 Da5	2.5Mpa	90°	1	49	141.7
Ub5 Da5	2.5Mpa	90°	1	50	138.55
Ub5 Da5	2.5Mpa	90°	1	51	138.92
Ub5 Da5	2.5Mpa	90°	1	52	179.39
Ub5 Da5	2.5Mpa	90°	1	53	202.58
Ub5 Da5	2.5Mpa	90°	1	54	138.31
Ub5 Da5	2.5Mpa	90°	1	55	159.64
Ub5 Da5	2.5Mpa	90°	1	56	118.72
Ub5 Da5	2.5Mpa	90°	1	57	126.11
Ub5 Da5	2.5Mpa	90°	1	58	126.46
Ub5 Da5	2.5Mpa	90°	1	59	133.75
Ub5 Da5	2.5Mpa	90°	1	60	147.17
Ua2 Dd2	2.5Mpa	90°	1	1	137.49
Ua2 Dd2	2.5Mpa	90°	1	2	187.18
Ua2 Dd2	2.5Mpa	90°	1	3	232.28
Ua2 Dd2	2.5Mpa	90°	1	4	102.21
Ua2 Dd2	2.5Mpa	90°	1	5	120.46
Ua2 Dd2	2.5Mpa	90°	1	6	182.01
Ua2 Dd2	2.5Mpa	90°	1	7	188.98
Ua2 Dd2	2.5Mpa	90°	1	8	199.84
Ua2 Dd2	2.5Mpa	90°	1	9	128.88
Ua2 Dd2	2.5Mpa	90°	1	10	116.16
Ua2 Dd2	2.5Mpa	90°	1	11	101.93
Ua2 Dd2	2.5Mpa	90°	1	12	127.56
Ua2 Dd2	2.5Mpa	90°	1	13	100.22
Ua2 Dd2	2.5Mpa	90°	1	14	137.58
Ua2 Dd2	2.5Mpa	90°	1	15	106.62
Ua2 Dd2	2.5Mpa	90°	1	16	2.08
Ua2 Dd2	2.5Mpa	90°	1	17	8.59
Ua2 Dd2	2.5Mpa	90°	1	18	13.98
Ua2 Dd2	2.5Mpa	90°	1	19	8.59
Ua2 Dd2	2.5Mpa	90°	1	20	8.59
Ua2 Dd2	2.5Mpa	90°	1	21	2.08
Ua2 Dd2	2.5Mpa	90°	1	22	2.08
Ua2 Dd2	2.5Mpa	90°	1	23	4.17
Ua2 Dd2	2.5Mpa	90°	1	24	10.62
Ua2 Dd2	2.5Mpa	90°	1	25	4.17
Ua2 Dd2	2.5Mpa	90°	1	26	10.62
Ua2 Dd2	2.5Mpa	90°	1	27	11.22
Ua2 Dd2	2.5Mpa	90°	1	28	4.66
Ua2 Dd2	2.5Mpa	90°	1	29	2.08
Ua2 Dd2	2.5Mpa	90°	1	30	4.17
Ua2 Dd2	2.5Mpa	90°	1	31	51.59
Ua2 Dd2	2.5Mpa	90°	1	32	48.65
Ua2 Dd2	2.5Mpa	90°	1	33	39.81
Ua2 Dd2	2.5Mpa	90°	1	34	44.3
Ua2 Dd2	2.5Mpa	90°	1	35	48.83
Ua2 Dd2	2.5Mpa	90°	1	36	37.57
Ua2 Dd2	2.5Mpa	90°	1	37	36.87
Ua2 Dd2	2.5Mpa	90°	1	38	44.2
Ua2 Dd2	2.5Mpa	90°	1	39	50.45
Ua2 Dd2	2.5Mpa	90°	1	40	35.36
Ua2 Dd2	2.5Mpa	90°	1	41	34.18
Ua2 Dd2	2.5Mpa	90°	1	42	29.62
Ua2 Dd2	2.5Mpa	90°	1	43	43.96
Ua2 Dd2	2.5Mpa	90°	1	44	37.1
Ua2 Dd2	2.5Mpa	90°	1	45	27.17
Ua2 Dd2	2.5Mpa	90°	1	46	238.67
Ua2 Dd2	2.5Mpa	90°	1	47	248.23
Ua2 Dd2	2.5Mpa	90°	1	48	198.08
Ua2 Dd2	2.5Mpa	90°	1	49	132.98
Ua2 Dd2	2.5Mpa	90°	1	50	139.7
Ua2 Dd2	2.5Mpa	90°	1	51	113.24
Ua2 Dd2	2.5Mpa	90°	1	52	160.94
Ua2 Dd2	2.5Mpa	90°	1	53	138.86
Ua2 Dd2	2.5Mpa	90°	1	54	134.73
Ua2 Dd2	2.5Mpa	90°	1	55	96.32
Ua2 Dd2	2.5Mpa	90°	1	56	102.47
Ua2 Dd2	2.5Mpa	90°	1	57	163.13
Ua2 Dd2	2.5Mpa	90°	1	58	214.34
Ua2 Dd2	2.5Mpa	90°	1	59	101.94
Ua2 Dd2	2.5Mpa	90°	1	60	76.46
Ub5 Da5	2.5Mpa	90°	2	1	194.27
Ub5 Da5	2.5Mpa	90°	2	2	150.23
Ub5 Da5	2.5Mpa	90°	2	3	162.3
Ub5 Da5	2.5Mpa	90°	2	4	150.82
Ub5 Da5	2.5Mpa	90°	2	5	115.08
Ub5 Da5	2.5Mpa	90°	2	6	108.35
Ub5 Da5	2.5Mpa	90°	2	7	133.43
Ub5 Da5	2.5Mpa	90°	2	8	158.89
Ub5 Da5	2.5Mpa	90°	2	9	184.21
Ub5 Da5	2.5Mpa	90°	2	10	162.8
Ub5 Da5	2.5Mpa	90°	2	11	133.68
Ub5 Da5	2.5Mpa	90°	2	12	194.76
Ub5 Da5	2.5Mpa	90°	2	13	101.23
Ub5 Da5	2.5Mpa	90°	2	14	243.94
Ub5 Da5	2.5Mpa	90°	2	15	223.96
Ub5 Da5	2.5Mpa	90°	2	16	4.85
Ub5 Da5	2.5Mpa	90°	2	17	4.85
Ub5 Da5	2.5Mpa	90°	2	18	2.43
Ub5 Da5	2.5Mpa	90°	2	19	3.47
Ub5 Da5	2.5Mpa	90°	2	20	12.5
Ub5 Da5	2.5Mpa	90°	2	21	7.76
Ub5 Da5	2.5Mpa	90°	2	22	5.48
Ub5 Da5	2.5Mpa	90°	2	23	1.73
Ub5 Da5	2.5Mpa	90°	2	24	3.47
Ub5 Da5	2.5Mpa	90°	2	25	3.88
Ub5 Da5	2.5Mpa	90°	2	26	6.94
Ub5 Da5	2.5Mpa	90°	2	27	6.25
Ub5 Da5	2.5Mpa	90°	2	28	6.25
Ub5 Da5	2.5Mpa	90°	2	29	1.73
Ub5 Da5	2.5Mpa	90°	2	30	2.45
Ub5 Da5	2.5Mpa	90°	2	31	45.03
Ub5 Da5	2.5Mpa	90°	2	32	32.91
Ub5 Da5	2.5Mpa	90°	2	33	40.6
Ub5 Da5	2.5Mpa	90°	2	34	55.42
Ub5 Da5	2.5Mpa	90°	2	35	56.49
Ub5 Da5	2.5Mpa	90°	2	36	62.87
Ub5 Da5	2.5Mpa	90°	2	37	54.29
Ub5 Da5	2.5Mpa	90°	2	38	56.7
Ub5 Da5	2.5Mpa	90°	2	39	56.18
Ub5 Da5	2.5Mpa	90°	2	40	56.49
Ub5 Da5	2.5Mpa	90°	2	41	50.78
Ub5 Da5	2.5Mpa	90°	2	42	41.7
Ub5 Da5	2.5Mpa	90°	2	43	66.04
Ub5 Da5	2.5Mpa	90°	2	44	53.79
Ub5 Da5	2.5Mpa	90°	2	45	74.6
Ub5 Da5	2.5Mpa	90°	2	46	171.67
Ub5 Da5	2.5Mpa	90°	2	47	135.47
Ub5 Da5	2.5Mpa	90°	2	48	110.86
Ub5 Da5	2.5Mpa	90°	2	49	129.5
Ub5 Da5	2.5Mpa	90°	2	50	136.96
Ub5 Da5	2.5Mpa	90°	2	51	99.23
Ub5 Da5	2.5Mpa	90°	2	52	116.26
Ub5 Da5	2.5Mpa	90°	2	53	172.01
Ub5 Da5	2.5Mpa	90°	2	54	167.83
Ub5 Da5	2.5Mpa	90°	2	55	194.27
Ub5 Da5	2.5Mpa	90°	2	56	149.38
Ub5 Da5	2.5Mpa	90°	2	57	116.63
Ub5 Da5	2.5Mpa	90°	2	58	213.49
Ub5 Da5	2.5Mpa	90°	2	59	85.1
Ub5 Da5	2.5Mpa	90°	2	60	155.91
Ua2 Dd2	2.5Mpa	90°	2	1	175.79
Ua2 Dd2	2.5Mpa	90°	2	2	173.84
Ua2 Dd2	2.5Mpa	90°	2	3	136.03
Ua2 Dd2	2.5Mpa	90°	2	4	157.07
Ua2 Dd2	2.5Mpa	90°	2	5	161.53
Ua2 Dd2	2.5Mpa	90°	2	6	179.28
Ua2 Dd2	2.5Mpa	90°	2	7	176.4
Ua2 Dd2	2.5Mpa	90°	2	8	224.21
Ua2 Dd2	2.5Mpa	90°	2	9	182.2
Ua2 Dd2	2.5Mpa	90°	2	10	165.19
Ua2 Dd2	2.5Mpa	90°	2	11	117.9
Ua2 Dd2	2.5Mpa	90°	2	12	181.89
Ua2 Dd2	2.5Mpa	90°	2	13	164.43
Ua2 Dd2	2.5Mpa	90°	2	14	146
Ua2 Dd2	2.5Mpa	90°	2	15	199.51
Ua2 Dd2	2.5Mpa	90°	2	16	2.39
Ua2 Dd2	2.5Mpa	90°	2	17	7.56
Ua2 Dd2	2.5Mpa	90°	2	18	5.34
Ua2 Dd2	2.5Mpa	90°	2	19	7.56
Ua2 Dd2	2.5Mpa	90°	2	20	5.34
Ua2 Dd2	2.5Mpa	90°	2	21	5.34
Ua2 Dd2	2.5Mpa	90°	2	22	5.34
Ua2 Dd2	2.5Mpa	90°	2	23	7.16
Ua2 Dd2	2.5Mpa	90°	2	24	9.56
Ua2 Dd2	2.5Mpa	90°	2	25	2.39
Ua2 Dd2	2.5Mpa	90°	2	26	2.39
Ua2 Dd2	2.5Mpa	90°	2	27	2.39
Ua2 Dd2	2.5Mpa	90°	2	28	5.34
Ua2 Dd2	2.5Mpa	90°	2	29	11.94
Ua2 Dd2	2.5Mpa	90°	2	30	3.38
Ua2 Dd2	2.5Mpa	90°	2	31	43.08
Ua2 Dd2	2.5Mpa	90°	2	32	37.78
Ua2 Dd2	2.5Mpa	90°	2	33	39.55
Ua2 Dd2	2.5Mpa	90°	2	34	53.7
Ua2 Dd2	2.5Mpa	90°	2	35	41.79
Ua2 Dd2	2.5Mpa	90°	2	36	61.25
Ua2 Dd2	2.5Mpa	90°	2	37	43.86
Ua2 Dd2	2.5Mpa	90°	2	38	36.4
Ua2 Dd2	2.5Mpa	90°	2	39	39.55
Ua2 Dd2	2.5Mpa	90°	2	40	55.94
Ua2 Dd2	2.5Mpa	90°	2	41	58.32
Ua2 Dd2	2.5Mpa	90°	2	42	40.83
Ua2 Dd2	2.5Mpa	90°	2	43	69.67
Ua2 Dd2	2.5Mpa	90°	2	44	45.34
Ua2 Dd2	2.5Mpa	90°	2	45	59.02
Ua2 Dd2	2.5Mpa	90°	2	46	198.89
Ua2 Dd2	2.5Mpa	90°	2	47	171.6
Ua2 Dd2	2.5Mpa	90°	2	48	158.17
Ua2 Dd2	2.5Mpa	90°	2	49	153.45
Ua2 Dd2	2.5Mpa	90°	2	50	166.73
Ua2 Dd2	2.5Mpa	90°	2	51	198.64
Ua2 Dd2	2.5Mpa	90°	2	52	208.13
Ua2 Dd2	2.5Mpa	90°	2	53	188.24
Ua2 Dd2	2.5Mpa	90°	2	54	165.19
Ua2 Dd2	2.5Mpa	90°	2	55	123.23
Ua2 Dd2	2.5Mpa	90°	2	56	114
Ua2 Dd2	2.5Mpa	90°	2	57	142.99
Ua2 Dd2	2.5Mpa	90°	2	58	135.15
Ua2 Dd2	2.5Mpa	90°	2	59	152.32
Ua2 Dd2	2.5Mpa	90°	2	60	119.97
Ub5 Da5	2.5Mpa	90°	3	1	199.04
Ub5 Da5	2.5Mpa	90°	3	2	179.38
Ub5 Da5	2.5Mpa	90°	3	3	175.52
Ub5 Da5	2.5Mpa	90°	3	4	137.33
Ub5 Da5	2.5Mpa	90°	3	5	135.11
Ub5 Da5	2.5Mpa	90°	3	6	232.45
Ub5 Da5	2.5Mpa	90°	3	7	188.68
Ub5 Da5	2.5Mpa	90°	3	8	151.14
Ub5 Da5	2.5Mpa	90°	3	9	270.12
Ub5 Da5	2.5Mpa	90°	3	10	227.13
Ub5 Da5	2.5Mpa	90°	3	11	134.91
Ub5 Da5	2.5Mpa	90°	3	12	91.35
Ub5 Da5	2.5Mpa	90°	3	13	137.03
Ub5 Da5	2.5Mpa	90°	3	14	111.53
Ub5 Da5	2.5Mpa	90°	3	15	176.36
Ub5 Da5	2.5Mpa	90°	3	16	14.73
Ub5 Da5	2.5Mpa	90°	3	17	12.43
Ub5 Da5	2.5Mpa	90°	3	18	14.87
Ub5 Da5	2.5Mpa	90°	3	19	2.89
Ub5 Da5	2.5Mpa	90°	3	20	2.89
Ub5 Da5	2.5Mpa	90°	3	21	9.13
Ub5 Da5	2.5Mpa	90°	3	22	10.21
Ub5 Da5	2.5Mpa	90°	3	23	6.46
Ub5 Da5	2.5Mpa	90°	3	24	4.57
Ub5 Da5	2.5Mpa	90°	3	25	8.66
Ub5 Da5	2.5Mpa	90°	3	26	2.04
Ub5 Da5	2.5Mpa	90°	3	27	6.46
Ub5 Da5	2.5Mpa	90°	3	28	4.09
Ub5 Da5	2.5Mpa	90°	3	29	2.04
Ub5 Da5	2.5Mpa	90°	3	30	2.89
Ub5 Da5	2.5Mpa	90°	3	31	69.59
Ub5 Da5	2.5Mpa	90°	3	32	61.33
Ub5 Da5	2.5Mpa	90°	3	33	56.1
Ub5 Da5	2.5Mpa	90°	3	34	43.34
Ub5 Da5	2.5Mpa	90°	3	35	60.12
Ub5 Da5	2.5Mpa	90°	3	36	55.77
Ub5 Da5	2.5Mpa	90°	3	37	51.73
Ub5 Da5	2.5Mpa	90°	3	38	46.59
Ub5 Da5	2.5Mpa	90°	3	39	47.7
Ub5 Da5	2.5Mpa	90°	3	40	35.27
Ub5 Da5	2.5Mpa	90°	3	41	49.42
Ub5 Da5	2.5Mpa	90°	3	42	48.09
Ub5 Da5	2.5Mpa	90°	3	43	58.14
Ub5 Da5	2.5Mpa	90°	3	44	41.11
Ub5 Da5	2.5Mpa	90°	3	45	43.29
Ub5 Da5	2.5Mpa	90°	3	46	163.42
Ub5 Da5	2.5Mpa	90°	3	47	209.5
Ub5 Da5	2.5Mpa	90°	3	48	124.69
Ub5 Da5	2.5Mpa	90°	3	49	124.65
Ub5 Da5	2.5Mpa	90°	3	50	98.75
Ub5 Da5	2.5Mpa	90°	3	51	135.84
Ub5 Da5	2.5Mpa	90°	3	52	151.34
Ub5 Da5	2.5Mpa	90°	3	53	152.57
Ub5 Da5	2.5Mpa	90°	3	54	119.62
Ub5 Da5	2.5Mpa	90°	3	55	133.06
Ub5 Da5	2.5Mpa	90°	3	56	200.54
Ub5 Da5	2.5Mpa	90°	3	57	106.22
Ub5 Da5	2.5Mpa	90°	3	58	186.32
Ub5 Da5	2.5Mpa	90°	3	59	270.21
Ub5 Da5	2.5Mpa	90°	3	60	123.2
Ua2 Dd2	2.5Mpa	90°	3	1	214.67
Ua2 Dd2	2.5Mpa	90°	3	2	123.9
Ua2 Dd2	2.5Mpa	90°	3	3	184.38
Ua2 Dd2	2.5Mpa	90°	3	4	111.82
Ua2 Dd2	2.5Mpa	90°	3	5	71.76
Ua2 Dd2	2.5Mpa	90°	3	6	107.14
Ua2 Dd2	2.5Mpa	90°	3	7	120.22
Ua2 Dd2	2.5Mpa	90°	3	8	139.31
Ua2 Dd2	2.5Mpa	90°	3	9	188.82
Ua2 Dd2	2.5Mpa	90°	3	10	176.36
Ua2 Dd2	2.5Mpa	90°	3	11	155.27
Ua2 Dd2	2.5Mpa	90°	3	12	171.14
Ua2 Dd2	2.5Mpa	90°	3	13	148.02
Ua2 Dd2	2.5Mpa	90°	3	14	141.81
Ua2 Dd2	2.5Mpa	90°	3	15	180
Ua2 Dd2	2.5Mpa	90°	3	16	2.09
Ua2 Dd2	2.5Mpa	90°	3	17	2.95
Ua2 Dd2	2.5Mpa	90°	3	18	2.95
Ua2 Dd2	2.5Mpa	90°	3	19	2.08
Ua2 Dd2	2.5Mpa	90°	3	20	4.17
Ua2 Dd2	2.5Mpa	90°	3	21	4.66
Ua2 Dd2	2.5Mpa	90°	3	22	6.59
Ua2 Dd2	2.5Mpa	90°	3	23	2.08
Ua2 Dd2	2.5Mpa	90°	3	24	4.17
Ua2 Dd2	2.5Mpa	90°	3	25	2.08
Ua2 Dd2	2.5Mpa	90°	3	26	4.17
Ua2 Dd2	2.5Mpa	90°	3	27	4.17
Ua2 Dd2	2.5Mpa	90°	3	28	5.9
Ua2 Dd2	2.5Mpa	90°	3	29	6.59
Ua2 Dd2	2.5Mpa	90°	3	30	4.17
Ua2 Dd2	2.5Mpa	90°	3	31	46.85
Ua2 Dd2	2.5Mpa	90°	3	32	56.9
Ua2 Dd2	2.5Mpa	90°	3	33	53.27
Ua2 Dd2	2.5Mpa	90°	3	34	34.19
Ua2 Dd2	2.5Mpa	90°	3	35	41.27
Ua2 Dd2	2.5Mpa	90°	3	36	50.89
Ua2 Dd2	2.5Mpa	90°	3	37	50.19
Ua2 Dd2	2.5Mpa	90°	3	38	39.82
Ua2 Dd2	2.5Mpa	90°	3	39	37.11
Ua2 Dd2	2.5Mpa	90°	3	40	35.5
Ua2 Dd2	2.5Mpa	90°	3	41	52.59
Ua2 Dd2	2.5Mpa	90°	3	42	51.6
Ua2 Dd2	2.5Mpa	90°	3	43	42.77
Ua2 Dd2	2.5Mpa	90°	3	44	38.43
Ua2 Dd2	2.5Mpa	90°	3	45	48.83
Ua2 Dd2	2.5Mpa	90°	3	46	109.09
Ua2 Dd2	2.5Mpa	90°	3	47	170.71
Ua2 Dd2	2.5Mpa	90°	3	48	129.94
Ua2 Dd2	2.5Mpa	90°	3	49	159.44
Ua2 Dd2	2.5Mpa	90°	3	50	118.03
Ua2 Dd2	2.5Mpa	90°	3	51	131.37
Ua2 Dd2	2.5Mpa	90°	3	52	225.61
Ua2 Dd2	2.5Mpa	90°	3	53	177.11
Ua2 Dd2	2.5Mpa	90°	3	54	181.21
Ua2 Dd2	2.5Mpa	90°	3	55	183.96
Ua2 Dd2	2.5Mpa	90°	3	56	201.56
Ua2 Dd2	2.5Mpa	90°	3	57	209.99
Ua2 Dd2	2.5Mpa	90°	3	58	115.34
Ua2 Dd2	2.5Mpa	90°	3	59	106.27
Ua2 Dd2	2.5Mpa	90°	3	60	135.27
Ub5 Da5	2.5Mpa	90°	4	1	221.1
Ub5 Da5	2.5Mpa	90°	4	2	143.6
Ub5 Da5	2.5Mpa	90°	4	3	202.17
Ub5 Da5	2.5Mpa	90°	4	4	126.95
Ub5 Da5	2.5Mpa	90°	4	5	109.94
Ub5 Da5	2.5Mpa	90°	4	6	123.7
Ub5 Da5	2.5Mpa	90°	4	7	171.32
Ub5 Da5	2.5Mpa	90°	4	8	183.6
Ub5 Da5	2.5Mpa	90°	4	9	118.28
Ub5 Da5	2.5Mpa	90°	4	10	171.22
Ub5 Da5	2.5Mpa	90°	4	11	153.16
Ub5 Da5	2.5Mpa	90°	4	12	140.26
Ub5 Da5	2.5Mpa	90°	4	13	133.67
Ub5 Da5	2.5Mpa	90°	4	14	64.85
Ub5 Da5	2.5Mpa	90°	4	15	141.84
Ub5 Da5	2.5Mpa	90°	4	16	6.43
Ub5 Da5	2.5Mpa	90°	4	17	2.03
Ub5 Da5	2.5Mpa	90°	4	18	2.03
Ub5 Da5	2.5Mpa	90°	4	19	6.43
Ub5 Da5	2.5Mpa	90°	4	20	4.55
Ub5 Da5	2.5Mpa	90°	4	21	4.07
Ub5 Da5	2.5Mpa	90°	4	22	2.03
Ub5 Da5	2.5Mpa	90°	4	23	2.88
Ub5 Da5	2.5Mpa	90°	4	24	2.03
Ub5 Da5	2.5Mpa	90°	4	25	4.07
Ub5 Da5	2.5Mpa	90°	4	26	4.07
Ub5 Da5	2.5Mpa	90°	4	27	4.55
Ub5 Da5	2.5Mpa	90°	4	28	2.88
Ub5 Da5	2.5Mpa	90°	4	29	4.55
Ub5 Da5	2.5Mpa	90°	4	30	2.88
Ub5 Da5	2.5Mpa	90°	4	31	43.24
Ub5 Da5	2.5Mpa	90°	4	32	60.4
Ub5 Da5	2.5Mpa	90°	4	33	33.36
Ub5 Da5	2.5Mpa	90°	4	34	30.23
Ub5 Da5	2.5Mpa	90°	4	35	27.36
Ub5 Da5	2.5Mpa	90°	4	36	46.11
Ub5 Da5	2.5Mpa	90°	4	37	36.21
Ub5 Da5	2.5Mpa	90°	4	38	41.93
Ub5 Da5	2.5Mpa	90°	4	39	46.83
Ub5 Da5	2.5Mpa	90°	4	40	56.55
Ub5 Da5	2.5Mpa	90°	4	41	39.49
Ub5 Da5	2.5Mpa	90°	4	42	43.24
Ub5 Da5	2.5Mpa	90°	4	43	32.8
Ub5 Da5	2.5Mpa	90°	4	44	41.73
Ub5 Da5	2.5Mpa	90°	4	45	41.73
Ub5 Da5	2.5Mpa	90°	4	46	113.98
Ub5 Da5	2.5Mpa	90°	4	47	154.18
Ub5 Da5	2.5Mpa	90°	4	48	126.77
Ub5 Da5	2.5Mpa	90°	4	49	97.58
Ub5 Da5	2.5Mpa	90°	4	50	112.57
Ub5 Da5	2.5Mpa	90°	4	51	153.66
Ub5 Da5	2.5Mpa	90°	4	52	161.87
Ub5 Da5	2.5Mpa	90°	4	53	216.53
Ub5 Da5	2.5Mpa	90°	4	54	237.03
Ub5 Da5	2.5Mpa	90°	4	55	107.93
Ub5 Da5	2.5Mpa	90°	4	56	135.67
Ub5 Da5	2.5Mpa	90°	4	57	201.03
Ub5 Da5	2.5Mpa	90°	4	58	82.59
Ub5 Da5	2.5Mpa	90°	4	59	125.66
Ub5 Da5	2.5Mpa	90°	4	60	140.26
Ua2 Dd2	2.5Mpa	90°	4	1	214.67
Ua2 Dd2	2.5Mpa	90°	4	2	123.9
Ua2 Dd2	2.5Mpa	90°	4	3	184.38
Ua2 Dd2	2.5Mpa	90°	4	4	111.82
Ua2 Dd2	2.5Mpa	90°	4	5	71.76
Ua2 Dd2	2.5Mpa	90°	4	6	107.14
Ua2 Dd2	2.5Mpa	90°	4	7	120.22
Ua2 Dd2	2.5Mpa	90°	4	8	139.31
Ua2 Dd2	2.5Mpa	90°	4	9	188.82
Ua2 Dd2	2.5Mpa	90°	4	10	176.36
Ua2 Dd2	2.5Mpa	90°	4	11	155.27
Ua2 Dd2	2.5Mpa	90°	4	12	171.14
Ua2 Dd2	2.5Mpa	90°	4	13	148.02
Ua2 Dd2	2.5Mpa	90°	4	14	141.81
Ua2 Dd2	2.5Mpa	90°	4	15	180
Ua2 Dd2	2.5Mpa	90°	4	16	2.09
Ua2 Dd2	2.5Mpa	90°	4	17	2.95
Ua2 Dd2	2.5Mpa	90°	4	18	2.95
Ua2 Dd2	2.5Mpa	90°	4	19	2.08
Ua2 Dd2	2.5Mpa	90°	4	20	4.17
Ua2 Dd2	2.5Mpa	90°	4	21	4.66
Ua2 Dd2	2.5Mpa	90°	4	22	6.59
Ua2 Dd2	2.5Mpa	90°	4	23	2.08
Ua2 Dd2	2.5Mpa	90°	4	24	4.17
Ua2 Dd2	2.5Mpa	90°	4	25	2.08
Ua2 Dd2	2.5Mpa	90°	4	26	4.17
Ua2 Dd2	2.5Mpa	90°	4	27	4.17
Ua2 Dd2	2.5Mpa	90°	4	28	5.9
Ua2 Dd2	2.5Mpa	90°	4	29	6.59
Ua2 Dd2	2.5Mpa	90°	4	30	4.17
Ua2 Dd2	2.5Mpa	90°	4	31	46.85
Ua2 Dd2	2.5Mpa	90°	4	32	56.9
Ua2 Dd2	2.5Mpa	90°	4	33	53.27
Ua2 Dd2	2.5Mpa	90°	4	34	34.19
Ua2 Dd2	2.5Mpa	90°	4	35	41.27
Ua2 Dd2	2.5Mpa	90°	4	36	50.89
Ua2 Dd2	2.5Mpa	90°	4	37	50.19
Ua2 Dd2	2.5Mpa	90°	4	38	39.82
Ua2 Dd2	2.5Mpa	90°	4	39	37.11
Ua2 Dd2	2.5Mpa	90°	4	40	35.5
Ua2 Dd2	2.5Mpa	90°	4	41	52.59
Ua2 Dd2	2.5Mpa	90°	4	42	51.6
Ua2 Dd2	2.5Mpa	90°	4	43	42.77
Ua2 Dd2	2.5Mpa	90°	4	44	38.43
Ua2 Dd2	2.5Mpa	90°	4	45	48.83
Ua2 Dd2	2.5Mpa	90°	4	46	109.09
Ua2 Dd2	2.5Mpa	90°	4	47	170.71
Ua2 Dd2	2.5Mpa	90°	4	48	129.94
Ua2 Dd2	2.5Mpa	90°	4	49	159.44
Ua2 Dd2	2.5Mpa	90°	4	50	118.03
Ua2 Dd2	2.5Mpa	90°	4	51	131.37
Ua2 Dd2	2.5Mpa	90°	4	52	225.61
Ua2 Dd2	2.5Mpa	90°	4	53	177.11
Ua2 Dd2	2.5Mpa	90°	4	54	181.21
Ua2 Dd2	2.5Mpa	90°	4	55	183.96
Ua2 Dd2	2.5Mpa	90°	4	56	201.56
Ua2 Dd2	2.5Mpa	90°	4	57	209.99
Ua2 Dd2	2.5Mpa	90°	4	58	115.34
Ua2 Dd2	2.5Mpa	90°	4	59	106.27
Ua2 Dd2	2.5Mpa	90°	4	60	135.27
Ub5 Da5	2.5Mpa	90°	5	1	189.6
Ub5 Da5	2.5Mpa	90°	5	2	139.36
Ub5 Da5	2.5Mpa	90°	5	3	170.91
Ub5 Da5	2.5Mpa	90°	5	4	229.51
Ub5 Da5	2.5Mpa	90°	5	5	240.71
Ub5 Da5	2.5Mpa	90°	5	6	182.31
Ub5 Da5	2.5Mpa	90°	5	7	165.14
Ub5 Da5	2.5Mpa	90°	5	8	209.29
Ub5 Da5	2.5Mpa	90°	5	9	158.74
Ub5 Da5	2.5Mpa	90°	5	10	173.23
Ub5 Da5	2.5Mpa	90°	5	11	69.02
Ub5 Da5	2.5Mpa	90°	5	12	148.61
Ub5 Da5	2.5Mpa	90°	5	13	113.36
Ub5 Da5	2.5Mpa	90°	5	14	166.21
Ub5 Da5	2.5Mpa	90°	5	15	174.48
Ub5 Da5	2.5Mpa	90°	5	16	4.17
Ub5 Da5	2.5Mpa	90°	5	17	2.95
Ub5 Da5	2.5Mpa	90°	5	18	4.17
Ub5 Da5	2.5Mpa	90°	5	19	6.25
Ub5 Da5	2.5Mpa	90°	5	20	2.08
Ub5 Da5	2.5Mpa	90°	5	21	2.08
Ub5 Da5	2.5Mpa	90°	5	22	2.95
Ub5 Da5	2.5Mpa	90°	5	23	4.17
Ub5 Da5	2.5Mpa	90°	5	24	4.17
Ub5 Da5	2.5Mpa	90°	5	25	2.08
Ub5 Da5	2.5Mpa	90°	5	26	2.08
Ub5 Da5	2.5Mpa	90°	5	27	4.17
Ub5 Da5	2.5Mpa	90°	5	28	2.08
Ub5 Da5	2.5Mpa	90°	5	29	4.66
Ub5 Da5	2.5Mpa	90°	5	30	7.51
Ub5 Da5	2.5Mpa	90°	5	31	56.07
Ub5 Da5	2.5Mpa	90°	5	32	53.04
Ub5 Da5	2.5Mpa	90°	5	33	57.22
Ub5 Da5	2.5Mpa	90°	5	34	45.08
Ub5 Da5	2.5Mpa	90°	5	35	48.83
Ub5 Da5	2.5Mpa	90°	5	36	56.3
Ub5 Da5	2.5Mpa	90°	5	37	43.96
Ub5 Da5	2.5Mpa	90°	5	38	47.24
Ub5 Da5	2.5Mpa	90°	5	39	46.83
Ub5 Da5	2.5Mpa	90°	5	40	53.13
Ub5 Da5	2.5Mpa	90°	5	41	55.49
Ub5 Da5	2.5Mpa	90°	5	42	42.96
Ub5 Da5	2.5Mpa	90°	5	43	57.63
Ub5 Da5	2.5Mpa	90°	5	44	43.36
Ub5 Da5	2.5Mpa	90°	5	45	53.25
Ub5 Da5	2.5Mpa	90°	5	46	156.18
Ub5 Da5	2.5Mpa	90°	5	47	152.84
Ub5 Da5	2.5Mpa	90°	5	48	280.55
Ub5 Da5	2.5Mpa	90°	5	49	130.51
Ub5 Da5	2.5Mpa	90°	5	50	145.42
Ub5 Da5	2.5Mpa	90°	5	51	141.13
Ub5 Da5	2.5Mpa	90°	5	52	191.12
Ub5 Da5	2.5Mpa	90°	5	53	115.83
Ub5 Da5	2.5Mpa	90°	5	54	149.7
Ub5 Da5	2.5Mpa	90°	5	55	175.42
Ub5 Da5	2.5Mpa	90°	5	56	123.03
Ub5 Da5	2.5Mpa	90°	5	57	166.99
Ub5 Da5	2.5Mpa	90°	5	58	133.97
Ub5 Da5	2.5Mpa	90°	5	59	84.99
Ub5 Da5	2.5Mpa	90°	5	60	120.4
Ua2 Dd2	2.5Mpa	90°	5	1	178.29
Ua2 Dd2	2.5Mpa	90°	5	2	132.35
Ua2 Dd2	2.5Mpa	90°	5	3	185.48
Ua2 Dd2	2.5Mpa	90°	5	4	131.28
Ua2 Dd2	2.5Mpa	90°	5	5	109.94
Ua2 Dd2	2.5Mpa	90°	5	6	127.47
Ua2 Dd2	2.5Mpa	90°	5	7	101
Ua2 Dd2	2.5Mpa	90°	5	8	176.55
Ua2 Dd2	2.5Mpa	90°	5	9	147.18
Ua2 Dd2	2.5Mpa	90°	5	10	117.09
Ua2 Dd2	2.5Mpa	90°	5	11	61.63
Ua2 Dd2	2.5Mpa	90°	5	12	135.27
Ua2 Dd2	2.5Mpa	90°	5	13	138.48
Ua2 Dd2	2.5Mpa	90°	5	14	157.67
Ua2 Dd2	2.5Mpa	90°	5	15	120.37
Ua2 Dd2	2.5Mpa	90°	5	16	5.72
Ua2 Dd2	2.5Mpa	90°	5	17	4.52
Ua2 Dd2	2.5Mpa	90°	5	18	6.06
Ua2 Dd2	2.5Mpa	90°	5	19	10.89
Ua2 Dd2	2.5Mpa	90°	5	20	10.11
Ua2 Dd2	2.5Mpa	90°	5	21	10.89
Ua2 Dd2	2.5Mpa	90°	5	22	6.06
Ua2 Dd2	2.5Mpa	90°	5	23	2.02
Ua2 Dd2	2.5Mpa	90°	5	24	4.04
Ua2 Dd2	2.5Mpa	90°	5	25	6.06
Ua2 Dd2	2.5Mpa	90°	5	26	4.04
Ua2 Dd2	2.5Mpa	90°	5	27	4.04
Ua2 Dd2	2.5Mpa	90°	5	28	2.02
Ua2 Dd2	2.5Mpa	90°	5	29	2.02
Ua2 Dd2	2.5Mpa	90°	5	30	4.52
Ua2 Dd2	2.5Mpa	90°	5	31	47.96
Ua2 Dd2	2.5Mpa	90°	5	32	44.41
Ua2 Dd2	2.5Mpa	90°	5	33	50.69
Ua2 Dd2	2.5Mpa	90°	5	34	43
Ua2 Dd2	2.5Mpa	90°	5	35	61.15
Ua2 Dd2	2.5Mpa	90°	5	36	41.7
Ua2 Dd2	2.5Mpa	90°	5	37	50.24
Ua2 Dd2	2.5Mpa	90°	5	38	44.91
Ua2 Dd2	2.5Mpa	90°	5	39	51.05
Ua2 Dd2	2.5Mpa	90°	5	40	46.22
Ua2 Dd2	2.5Mpa	90°	5	41	43.76
Ua2 Dd2	2.5Mpa	90°	5	42	48.96
Ua2 Dd2	2.5Mpa	90°	5	43	51.58
Ua2 Dd2	2.5Mpa	90°	5	44	51.8
Ua2 Dd2	2.5Mpa	90°	5	45	36.01
Ua2 Dd2	2.5Mpa	90°	5	46	204.35
Ua2 Dd2	2.5Mpa	90°	5	47	202.49
Ua2 Dd2	2.5Mpa	90°	5	48	134.99
Ua2 Dd2	2.5Mpa	90°	5	49	121.63
Ua2 Dd2	2.5Mpa	90°	5	50	145.31
Ua2 Dd2	2.5Mpa	90°	5	51	226.99
Ua2 Dd2	2.5Mpa	90°	5	52	185.71
Ua2 Dd2	2.5Mpa	90°	5	53	134.74
Ua2 Dd2	2.5Mpa	90°	5	54	133.09
Ua2 Dd2	2.5Mpa	90°	5	55	123.29
Ua2 Dd2	2.5Mpa	90°	5	56	196.3
Ua2 Dd2	2.5Mpa	90°	5	57	85.8
Ua2 Dd2	2.5Mpa	90°	5	58	111.28
Ua2 Dd2	2.5Mpa	90°	5	59	128.17
Ua2 Dd2	2.5Mpa	90°	5	60	102.24
Ud3 Dc3	2Mpa	90°	1	1	146.85
Ud3 Dc3	2Mpa	90°	1	2	128.74
Ud3 Dc3	2Mpa	90°	1	3	123.18
Ud3 Dc3	2Mpa	90°	1	4	133.36
Ud3 Dc3	2Mpa	90°	1	5	190.07
Ud3 Dc3	2Mpa	90°	1	6	182.38
Ud3 Dc3	2Mpa	90°	1	7	96.79
Ud3 Dc3	2Mpa	90°	1	8	96.79
Ud3 Dc3	2Mpa	90°	1	9	118.37
Ud3 Dc3	2Mpa	90°	1	10	119.65
Ud3 Dc3	2Mpa	90°	1	11	153.79
Ud3 Dc3	2Mpa	90°	1	12	75.82
Ud3 Dc3	2Mpa	90°	1	13	72.91
Ud3 Dc3	2Mpa	90°	1	14	80.28
Ud3 Dc3	2Mpa	90°	1	15	276.69
Ud3 Dc3	2Mpa	90°	1	16	5.05
Ud3 Dc3	2Mpa	90°	1	17	7.14
Ud3 Dc3	2Mpa	90°	1	18	3.57
Ud3 Dc3	2Mpa	90°	1	19	10.42
Ud3 Dc3	2Mpa	90°	1	20	5.65
Ud3 Dc3	2Mpa	90°	1	21	7.14
Ud3 Dc3	2Mpa	90°	1	22	10.1
Ud3 Dc3	2Mpa	90°	1	23	7.14
Ud3 Dc3	2Mpa	90°	1	24	7.99
Ud3 Dc3	2Mpa	90°	1	25	7.58
Ud3 Dc3	2Mpa	90°	1	26	2.53
Ud3 Dc3	2Mpa	90°	1	27	5.05
Ud3 Dc3	2Mpa	90°	1	28	2.53
Ud3 Dc3	2Mpa	90°	1	29	5.65
Ud3 Dc3	2Mpa	90°	1	30	3.57
Ud3 Dc3	2Mpa	90°	1	31	37.73
Ud3 Dc3	2Mpa	90°	1	32	39.46
Ud3 Dc3	2Mpa	90°	1	33	44.7
Ud3 Dc3	2Mpa	90°	1	34	42.95
Ud3 Dc3	2Mpa	90°	1	35	46.45
Ud3 Dc3	2Mpa	90°	1	36	25.36
Ud3 Dc3	2Mpa	90°	1	37	31.55
Ud3 Dc3	2Mpa	90°	1	38	40.4
Ud3 Dc3	2Mpa	90°	1	39	30.29
Ud3 Dc3	2Mpa	90°	1	40	30.87
Ud3 Dc3	2Mpa	90°	1	41	31.55
Ud3 Dc3	2Mpa	90°	1	42	35.08
Ud3 Dc3	2Mpa	90°	1	43	33.75
Ud3 Dc3	2Mpa	90°	1	44	40.12
Ud3 Dc3	2Mpa	90°	1	45	34.76
Ud3 Dc3	2Mpa	90°	1	46	193.62
Ud3 Dc3	2Mpa	90°	1	47	119.62
Ud3 Dc3	2Mpa	90°	1	48	171.72
Ud3 Dc3	2Mpa	90°	1	49	77.76
Ud3 Dc3	2Mpa	90°	1	50	160.9
Ud3 Dc3	2Mpa	90°	1	51	109.62
Ud3 Dc3	2Mpa	90°	1	52	125.72
Ud3 Dc3	2Mpa	90°	1	53	124.69
Ud3 Dc3	2Mpa	90°	1	54	81.57
Ud3 Dc3	2Mpa	90°	1	55	137.75
Ud3 Dc3	2Mpa	90°	1	56	131.34
Ud3 Dc3	2Mpa	90°	1	57	108.21
Ud3 Dc3	2Mpa	90°	1	58	120.39
Ud3 Dc3	2Mpa	90°	1	59	166.83
Ud3 Dc3	2Mpa	90°	1	60	92.08
Uc5 Db5	2Mpa	90°	1	1	158.59
Uc5 Db5	2Mpa	90°	1	2	138.59
Uc5 Db5	2Mpa	90°	1	3	138.31
Uc5 Db5	2Mpa	90°	1	4	97.47
Uc5 Db5	2Mpa	90°	1	5	89.68
Uc5 Db5	2Mpa	90°	1	6	131.57
Uc5 Db5	2Mpa	90°	1	7	163.68
Uc5 Db5	2Mpa	90°	1	8	209.54
Uc5 Db5	2Mpa	90°	1	9	131.43
Uc5 Db5	2Mpa	90°	1	10	125.9
Uc5 Db5	2Mpa	90°	1	11	207.98
Uc5 Db5	2Mpa	90°	1	12	171.66
Uc5 Db5	2Mpa	90°	1	13	208.34
Uc5 Db5	2Mpa	90°	1	14	149.75
Uc5 Db5	2Mpa	90°	1	15	109.32
Uc5 Db5	2Mpa	90°	1	16	4.17
Uc5 Db5	2Mpa	90°	1	17	4.66
Uc5 Db5	2Mpa	90°	1	18	4.17
Uc5 Db5	2Mpa	90°	1	19	6.25
Uc5 Db5	2Mpa	90°	1	20	9.32
Uc5 Db5	2Mpa	90°	1	21	9.32
Uc5 Db5	2Mpa	90°	1	22	4.66
Uc5 Db5	2Mpa	90°	1	23	14.74
Uc5 Db5	2Mpa	90°	1	24	11.22
Uc5 Db5	2Mpa	90°	1	25	2.08
Uc5 Db5	2Mpa	90°	1	26	7.51
Uc5 Db5	2Mpa	90°	1	27	4.66
Uc5 Db5	2Mpa	90°	1	28	2.08
Uc5 Db5	2Mpa	90°	1	29	2.08
Uc5 Db5	2Mpa	90°	1	30	4.66
Uc5 Db5	2Mpa	90°	1	31	37.28
Uc5 Db5	2Mpa	90°	1	32	30.77
Uc5 Db5	2Mpa	90°	1	33	42.97
Uc5 Db5	2Mpa	90°	1	34	41.37
Uc5 Db5	2Mpa	90°	1	35	40.47
Uc5 Db5	2Mpa	90°	1	36	24.3
Uc5 Db5	2Mpa	90°	1	37	27.98
Uc5 Db5	2Mpa	90°	1	38	30.06
Uc5 Db5	2Mpa	90°	1	39	29.83
Uc5 Db5	2Mpa	90°	1	40	31.26
Uc5 Db5	2Mpa	90°	1	41	31.74
Uc5 Db5	2Mpa	90°	1	42	31.74
Uc5 Db5	2Mpa	90°	1	43	35.86
Uc5 Db5	2Mpa	90°	1	44	40.47
Uc5 Db5	2Mpa	90°	1	45	24.3
Uc5 Db5	2Mpa	90°	1	46	186.63
Uc5 Db5	2Mpa	90°	1	47	148.15
Uc5 Db5	2Mpa	90°	1	48	154.88
Uc5 Db5	2Mpa	90°	1	49	104.19
Uc5 Db5	2Mpa	90°	1	50	178.13
Uc5 Db5	2Mpa	90°	1	51	119.55
Uc5 Db5	2Mpa	90°	1	52	95.91
Uc5 Db5	2Mpa	90°	1	53	127.08
Uc5 Db5	2Mpa	90°	1	54	214.62
Uc5 Db5	2Mpa	90°	1	55	138.11
Uc5 Db5	2Mpa	90°	1	56	96.04
Uc5 Db5	2Mpa	90°	1	57	154.71
Uc5 Db5	2Mpa	90°	1	58	205.42
Uc5 Db5	2Mpa	90°	1	59	213.73
Uc5 Db5	2Mpa	90°	1	60	141.24
Ud3 Dc3	2Mpa	90°	2	1	214.9
Ud3 Dc3	2Mpa	90°	2	2	188.68
Ud3 Dc3	2Mpa	90°	2	3	187.49
Ud3 Dc3	2Mpa	90°	2	4	107.67
Ud3 Dc3	2Mpa	90°	2	5	173.81
Ud3 Dc3	2Mpa	90°	2	6	135.76
Ud3 Dc3	2Mpa	90°	2	7	130.51
Ud3 Dc3	2Mpa	90°	2	8	181.32
Ud3 Dc3	2Mpa	90°	2	9	122.71
Ud3 Dc3	2Mpa	90°	2	10	97.9
Ud3 Dc3	2Mpa	90°	2	11	92.75
Ud3 Dc3	2Mpa	90°	2	12	147.15
Ud3 Dc3	2Mpa	90°	2	13	231.84
Ud3 Dc3	2Mpa	90°	2	14	119.8
Ud3 Dc3	2Mpa	90°	2	15	139.81
Ud3 Dc3	2Mpa	90°	2	16	6.99
Ud3 Dc3	2Mpa	90°	2	17	5.52
Ud3 Dc3	2Mpa	90°	2	18	7.81
Ud3 Dc3	2Mpa	90°	2	19	2.47
Ud3 Dc3	2Mpa	90°	2	20	11.04
Ud3 Dc3	2Mpa	90°	2	21	5.52
Ud3 Dc3	2Mpa	90°	2	22	7.81
Ud3 Dc3	2Mpa	90°	2	23	2.47
Ud3 Dc3	2Mpa	90°	2	24	12.35
Ud3 Dc3	2Mpa	90°	2	25	5.52
Ud3 Dc3	2Mpa	90°	2	26	2.47
Ud3 Dc3	2Mpa	90°	2	27	2.47
Ud3 Dc3	2Mpa	90°	2	28	2.47
Ud3 Dc3	2Mpa	90°	2	29	7.81
Ud3 Dc3	2Mpa	90°	2	30	7.81
Ud3 Dc3	2Mpa	90°	2	31	52.36
Ud3 Dc3	2Mpa	90°	2	32	45.86
Ud3 Dc3	2Mpa	90°	2	33	72.64
Ud3 Dc3	2Mpa	90°	2	34	52.92
Ud3 Dc3	2Mpa	90°	2	35	79.86
Ud3 Dc3	2Mpa	90°	2	36	43.68
Ud3 Dc3	2Mpa	90°	2	37	70.25
Ud3 Dc3	2Mpa	90°	2	38	49.42
Ud3 Dc3	2Mpa	90°	2	39	51.88
Ud3 Dc3	2Mpa	90°	2	40	50.88
Ud3 Dc3	2Mpa	90°	2	41	52.11
Ud3 Dc3	2Mpa	90°	2	42	48.14
Ud3 Dc3	2Mpa	90°	2	43	48.18
Ud3 Dc3	2Mpa	90°	2	44	34.06
Ud3 Dc3	2Mpa	90°	2	45	47.33
Ud3 Dc3	2Mpa	90°	2	46	140.18
Ud3 Dc3	2Mpa	90°	2	47	159.57
Ud3 Dc3	2Mpa	90°	2	48	149.07
Ud3 Dc3	2Mpa	90°	2	49	120
Ud3 Dc3	2Mpa	90°	2	50	141.4
Ud3 Dc3	2Mpa	90°	2	51	167.28
Ud3 Dc3	2Mpa	90°	2	52	158.15
Ud3 Dc3	2Mpa	90°	2	53	138.58
Ud3 Dc3	2Mpa	90°	2	54	163.38
Ud3 Dc3	2Mpa	90°	2	55	165.34
Ud3 Dc3	2Mpa	90°	2	56	139.66
Ud3 Dc3	2Mpa	90°	2	57	106.59
Ud3 Dc3	2Mpa	90°	2	58	89.85
Ud3 Dc3	2Mpa	90°	2	59	226.27
Ud3 Dc3	2Mpa	90°	2	60	171.84
Uc5 Db5	2Mpa	90°	2	1	196.99
Uc5 Db5	2Mpa	90°	2	2	133.29
Uc5 Db5	2Mpa	90°	2	3	143.33
Uc5 Db5	2Mpa	90°	2	4	152.86
Uc5 Db5	2Mpa	90°	2	5	109.57
Uc5 Db5	2Mpa	90°	2	6	147.7
Uc5 Db5	2Mpa	90°	2	7	165.01
Uc5 Db5	2Mpa	90°	2	8	139.5
Uc5 Db5	2Mpa	90°	2	9	162.2
Uc5 Db5	2Mpa	90°	2	10	189.06
Uc5 Db5	2Mpa	90°	2	11	107.43
Uc5 Db5	2Mpa	90°	2	12	103.7
Uc5 Db5	2Mpa	90°	2	13	123.22
Uc5 Db5	2Mpa	90°	2	14	156.03
Uc5 Db5	2Mpa	90°	2	15	105.45
Uc5 Db5	2Mpa	90°	2	16	2.05
Uc5 Db5	2Mpa	90°	2	17	10.46
Uc5 Db5	2Mpa	90°	2	18	2.05
Uc5 Db5	2Mpa	90°	2	19	3.93
Uc5 Db5	2Mpa	90°	2	20	3.51
Uc5 Db5	2Mpa	90°	2	21	3.93
Uc5 Db5	2Mpa	90°	2	22	5.56
Uc5 Db5	2Mpa	90°	2	23	1.76
Uc5 Db5	2Mpa	90°	2	24	3.51
Uc5 Db5	2Mpa	90°	2	25	5.27
Uc5 Db5	2Mpa	90°	2	26	1.76
Uc5 Db5	2Mpa	90°	2	27	3.51
Uc5 Db5	2Mpa	90°	2	28	1.76
Uc5 Db5	2Mpa	90°	2	29	5.56
Uc5 Db5	2Mpa	90°	2	30	1.76
Uc5 Db5	2Mpa	90°	2	31	26.42
Uc5 Db5	2Mpa	90°	2	32	23.12
Uc5 Db5	2Mpa	90°	2	33	32.07
Uc5 Db5	2Mpa	90°	2	34	31.83
Uc5 Db5	2Mpa	90°	2	35	22.85
Uc5 Db5	2Mpa	90°	2	36	28.34
Uc5 Db5	2Mpa	90°	2	37	29.93
Uc5 Db5	2Mpa	90°	2	38	28.17
Uc5 Db5	2Mpa	90°	2	39	24.6
Uc5 Db5	2Mpa	90°	2	40	31.63
Uc5 Db5	2Mpa	90°	2	41	28.12
Uc5 Db5	2Mpa	90°	2	42	33.58
Uc5 Db5	2Mpa	90°	2	43	28.34
Uc5 Db5	2Mpa	90°	2	44	19.33
Uc5 Db5	2Mpa	90°	2	45	28.17
Uc5 Db5	2Mpa	90°	2	46	124.2
Uc5 Db5	2Mpa	90°	2	47	63.88
Uc5 Db5	2Mpa	90°	2	48	176.62
Uc5 Db5	2Mpa	90°	2	49	69.1
Uc5 Db5	2Mpa	90°	2	50	125.3
Uc5 Db5	2Mpa	90°	2	51	155.18
Uc5 Db5	2Mpa	90°	2	52	89.72
Uc5 Db5	2Mpa	90°	2	53	118.08
Uc5 Db5	2Mpa	90°	2	54	76.87
Uc5 Db5	2Mpa	90°	2	55	93.61
Uc5 Db5	2Mpa	90°	2	56	107.96
Uc5 Db5	2Mpa	90°	2	57	136.27
Uc5 Db5	2Mpa	90°	2	58	64.66
Uc5 Db5	2Mpa	90°	2	59	178.55
Uc5 Db5	2Mpa	90°	2	60	195.5
Ud3 Dc3	2Mpa	90°	3	1	143.36
Ud3 Dc3	2Mpa	90°	3	2	139.44
Ud3 Dc3	2Mpa	90°	3	3	172.74
Ud3 Dc3	2Mpa	90°	3	4	142.16
Ud3 Dc3	2Mpa	90°	3	5	99.51
Ud3 Dc3	2Mpa	90°	3	6	148.12
Ud3 Dc3	2Mpa	90°	3	7	108.87
Ud3 Dc3	2Mpa	90°	3	8	90.54
Ud3 Dc3	2Mpa	90°	3	9	197.99
Ud3 Dc3	2Mpa	90°	3	10	97.52
Ud3 Dc3	2Mpa	90°	3	11	86.82
Ud3 Dc3	2Mpa	90°	3	12	109.12
Ud3 Dc3	2Mpa	90°	3	13	113.55
Ud3 Dc3	2Mpa	90°	3	14	91.1
Ud3 Dc3	2Mpa	90°	3	15	88.08
Ud3 Dc3	2Mpa	90°	3	16	2.06
Ud3 Dc3	2Mpa	90°	3	17	4.61
Ud3 Dc3	2Mpa	90°	3	18	4.61
Ud3 Dc3	2Mpa	90°	3	19	4.12
Ud3 Dc3	2Mpa	90°	3	20	6.19
Ud3 Dc3	2Mpa	90°	3	21	4.61
Ud3 Dc3	2Mpa	90°	3	22	7.43
Ud3 Dc3	2Mpa	90°	3	23	4.61
Ud3 Dc3	2Mpa	90°	3	24	4.12
Ud3 Dc3	2Mpa	90°	3	25	4.61
Ud3 Dc3	2Mpa	90°	3	26	2.92
Ud3 Dc3	2Mpa	90°	3	27	2.92
Ud3 Dc3	2Mpa	90°	3	28	4.61
Ud3 Dc3	2Mpa	90°	3	29	4.61
Ud3 Dc3	2Mpa	90°	3	30	4.12
Ud3 Dc3	2Mpa	90°	3	31	48.53
Ud3 Dc3	2Mpa	90°	3	32	50.56
Ud3 Dc3	2Mpa	90°	3	33	52.85
Ud3 Dc3	2Mpa	90°	3	34	31.88
Ud3 Dc3	2Mpa	90°	3	35	30.81
Ud3 Dc3	2Mpa	90°	3	36	35.97
Ud3 Dc3	2Mpa	90°	3	37	33.45
Ud3 Dc3	2Mpa	90°	3	38	35.97
Ud3 Dc3	2Mpa	90°	3	39	27.05
Ud3 Dc3	2Mpa	90°	3	40	39.42
Ud3 Dc3	2Mpa	90°	3	41	37.4
Ud3 Dc3	2Mpa	90°	3	42	27.01
Ud3 Dc3	2Mpa	90°	3	43	41.64
Ud3 Dc3	2Mpa	90°	3	44	43.66
Ud3 Dc3	2Mpa	90°	3	45	43.66
Ud3 Dc3	2Mpa	90°	3	46	116
Ud3 Dc3	2Mpa	90°	3	47	88.56
Ud3 Dc3	2Mpa	90°	3	48	100.77
Ud3 Dc3	2Mpa	90°	3	49	112.35
Ud3 Dc3	2Mpa	90°	3	50	84.39
Ud3 Dc3	2Mpa	90°	3	51	55.73
Ud3 Dc3	2Mpa	90°	3	52	80.73
Ud3 Dc3	2Mpa	90°	3	53	77.69
Ud3 Dc3	2Mpa	90°	3	54	74.65
Ud3 Dc3	2Mpa	90°	3	55	134.86
Ud3 Dc3	2Mpa	90°	3	56	127.18
Ud3 Dc3	2Mpa	90°	3	57	149.26
Ud3 Dc3	2Mpa	90°	3	58	76.9
Ud3 Dc3	2Mpa	90°	3	59	118.11
Ud3 Dc3	2Mpa	90°	3	60	82.68
Uc5 Db5	2Mpa	90°	3	1	201.58
Uc5 Db5	2Mpa	90°	3	2	109.21
Uc5 Db5	2Mpa	90°	3	3	134.41
Uc5 Db5	2Mpa	90°	3	4	175.8
Uc5 Db5	2Mpa	90°	3	5	163.41
Uc5 Db5	2Mpa	90°	3	6	191.7
Uc5 Db5	2Mpa	90°	3	7	175.43
Uc5 Db5	2Mpa	90°	3	8	188.53
Uc5 Db5	2Mpa	90°	3	9	94.59
Uc5 Db5	2Mpa	90°	3	10	134.09
Uc5 Db5	2Mpa	90°	3	11	127.31
Uc5 Db5	2Mpa	90°	3	12	96.67
Uc5 Db5	2Mpa	90°	3	13	133.87
Uc5 Db5	2Mpa	90°	3	14	165.12
Uc5 Db5	2Mpa	90°	3	15	98.76
Uc5 Db5	2Mpa	90°	3	16	2.05
Uc5 Db5	2Mpa	90°	3	17	4.11
Uc5 Db5	2Mpa	90°	3	18	4.11
Uc5 Db5	2Mpa	90°	3	19	10.47
[truncated: 881 more rows]
